# Supplementary material for: Blindsight relies on a functional connection between hMT+ and the lateral geniculate nucleus, not the pulvinar
Source: PLoS Biol. 2018 Jul 25;16(7):e2005769. doi: 10.1371/journal.pbio.2005769 (PMC6078309; doi:10.1371/journal.pbio.2005769)
Supplement: S2 Data — Each tab represents data for one participant. This data underlies Fig 2. BOLD, blood oxygen level–dependent; ROI, region of interest. (XLSX) [file pbio.2005769.s009.xlsx]

## Sheet: C1
	Fig 2A: Left LGN	Fig 2A: Right LGN	Fig 2B: Right V5	Fig 2B: Left V5	Fig 2A: Right V1	Fig 2A: Left V1
265 data points	1.03344	4.20481	-24.2526	-34.1516	33.2386	4.72952
530	-21.8164	-24.9042	-6.97236	-15.8663	-26.4643	-18.2205
8.83333	-1.4128	10.3708	2.18671	-13.2173	-50.3804	-35.4479
265 vols	-11.3141	-17.7232	2.09863	-11.5811	0.31991	-22.0569
	3.01892	12.5362	6.56161	35.4588	29.1087	20.7866
	25.3124	-75.4521	13.0171	10.6588	-31.1973	-1.87567
	-24.3088	-1.93052	-12.2472	6.85916	-39.7986	-18.549
	0.402765	-22.1133	1.76557	4.98591	28.1869	25.8215
	-7.44256	6.73807	-5.29836	11.3169	33.0044	36.5373
	-36.4531	51.7664	-18.4322	-28.9144	-65.1721	-16.4896
	-58.2843	-12.88	7.76026	-5.03913	-41.1947	-21.5442
	-39.3099	-62.7419	21.9462	31.4039	-19.0248	5.74222
	-4.97451	20.0244	-0.0228202	-15.448	-20.9618	9.42398
	-50.3731	-22.1937	-23.9213	-19.1299	-23.5385	-38.6116
	16.9153	-117.811	-11.5126	-25.2487	-24.8054	-58.3808
	-2.15744	0.0349855	-8.75375	-29.0357	-34.0109	-18.4295
	62.3664	-22.5834	-5.69727	-14.1191	-4.70052	-17.0578
	28.5193	-3.24235	1.58903	-27.0592	-21.9367	-17.1754
	59.3394	12.6667	14.5152	3.72526	1.65401	0.329081
	18.0722	7.36648	26.0229	-8.24328	-10.9793	-7.17312
	-35.2651	60.4753	17.0939	29.6374	20.4822	-8.47762
	0.110225	39.2913	38.2612	20.3482	2.95788	-1.29942
	-18.2772	48.9237	26.8943	10.813	14.9498	6.96895
	28.9228	-35.0528	-2.52861	21.1101	54.0092	31.3087
	16.2404	-0.650817	-31.9376	-6.92448	77.484	12.3404
	21.1814	-54.609	-15.502	-12.2833	-1.18226	-11.1764
	-5.87826	-1.3212	35.6789	8.40506	26.4641	-13.0134
	91.9494	37.1097	7.68329	3.30004	-11.5277	-10.7814
	-24.3046	17.9737	-27.7509	-2.64581	-17.2901	-1.95291
	-19.6875	-49.5796	-42.7221	-49.6147	3.88097	-12.8709
	-40.1923	-11.7582	5.57446	7.06089	-12.4914	-22.8507
	5.32554	56.1873	27.3802	25.357	-24.6239	-11.0484
	1.35849	35.3078	11.9264	35.1809	2.5885	30.3829
	33.9005	38.9884	2.08374	15.4414	64.4909	59.9626
	68.8152	-20.1095	-2.50804	-18.6324	21.2101	32.356
	-6.62571	-17.5042	-19.7224	-33.3582	-18.6696	-11.6418
	17.9132	16.9022	-16.9889	23.4797	3.90573	-1.10682
	0.928225	-59.1422	-14.0262	-28.7501	-17.898	5.71953
	-74.6045	12.1534	1.03885	-5.16142	7.02015	-39.3587
	44.0367	-25.6759	12.8339	10.3681	-19.0517	0.834525
	-58.732	34.0137	1.77446	3.60195	-23.3617	1.18153
	-72.4636	-26.0731	0.576986	6.41501	-13.7867	-9.61687
	-10.8133	24.5693	-4.68242	-31.5022	-44.8638	2.24632
	1.90002	41.4012	-4.01508	-19.4383	-27.5024	-13.4594
	53.3333	36.8344	-23.6948	-3.77958	-35.5058	-29.2005
	13.0735	19.2827	14.7632	37.5628	11.243	6.2361
	-37.1912	-5.85054	-8.59295	-7.66039	12.8265	-12.3053
	-6.91054	-14.3173	-8.57374	-17.1971	41.2388	21.9613
	14.3317	-9.90994	-30.3465	-7.70241	-11.008	7.32442
	-16.5265	-4.30425	-38.1238	-29.1438	-52.1132	-42.5083
	-0.632815	-69.2608	7.34393	-8.31685	-46.0827	11.8777
	-23.944	5.01645	8.76212	36.9085	5.83832	50.8162
	60.5156	84.7113	9.865	12.1743	46.7275	36.6252
	49.8345	-67.4466	14.669	11.4707	74.5532	18.5791
	3.356	7.74377	1.20369	0.517576	25.5806	-13.2064
	4.98718	10.4207	-28.1349	-19.1054	0.600693	0.04164
	-33.4779	-10.2973	-12.1918	-18.2059	-29.9893	12.386
	-19.4441	-7.93249	12.7888	24.8968	11.9969	-19.9015
	-5.93265	10.1276	-6.91923	23.2401	25.727	20.3326
	-32.3445	-31.7019	15.9394	-18.5743	-38.6116	-15.7953
	31.6352	18.6	-5.36977	30.002	-2.26127	17.4493
	52.204	-39.8289	30.8837	43.1339	-8.86654	16.1562
	-19.0319	-42.4343	43.1926	37.3776	14.6316	17.7
	7.64948	39.46	15.6358	8.45636	19.5917	8.92117
	21.7723	-22.0884	15.0039	-5.36278	0.834197	23.1895
	-29.1868	38.8135	-26.7615	5.48438	19.2725	-13.6486
	-21.9255	13.6007	23.9541	1.11769	25.8634	2.77103
	-14.3235	21.2253	18.415	6.81557	48.2644	1.63492
	-17.2179	14.5804	-11.0255	-12.0788	-13.4668	6.42822
	46.6306	-22.7781	-11.3583	8.42803	-19.4923	-22.5725
	3.51956	-28.1692	17.605	-2.26997	-44.7642	-38.4808
	-54.2311	-4.62307	-1.56399	-4.53555	-43.9376	-41.3592
	4.3179	-5.25754	-24.4308	-40.7467	-27.266	-13.8902
	-8.15007	-8.46598	-7.76901	-29.0279	-30.3161	-23.4061
	10.1893	44.0548	18.345	3.28232	51.5236	25.6505
	20.7458	-57.6549	-8.69469	11.2222	50.2109	15.5833
	-90.2058	39.6901	17.2929	32.6165	26.4787	16.6761
	-64.1374	-36.2864	16.8626	3.5786	-17.6439	-12.2271
	51.3338	-64.2427	-5.57421	-7.11023	30.9235	-20.9397
	-3.51683	0.63655	9.79187	-9.04856	-6.62187	-11.3674
	-1.69959	-27.5838	-12.793	-18.549	-10.4954	-9.30191
	30.0045	48.3105	1.04748	-8.9165	62.5425	9.17525
	9.31556	15.7695	-26.6338	-4.35209	10.5105	-10.4054
	-41.9514	58.4157	35.7312	9.65976	51.547	31.8505
	7.89068	9.22449	5.09946	1.98489	13.3742	18.4448
	-17.2368	4.28515	9.04146	-22.7278	-15.3597	-10.69
	-58.2077	-40.41	-44.1806	-29.2629	-72.6465	-51.3858
	-16.8099	-0.839534	-31.0287	-29.978	-63.0649	-48.8357
	16.328	-16.1673	-0.0693154	3.67521	-24.6259	25.2875
	-2.91496	-13.8471	5.47096	2.04032	-5.32283	-16.972
	73.556	6.05483	-7.46818	19.1237	-9.39431	9.59483
	63.9828	98.281	50.0014	51.613	73.2448	49.7209
	30.4654	31.0243	29.4326	48.4408	126.696	117.039
	26.6403	-20.9093	11.0994	39.1473	54.0601	59.1797
	28.7831	72.2801	-19.2482	-6.18765	-4.62261	40.1911
	42.3874	15.8443	-41.9002	-16.2763	-43.1488	-24.574
	47.411	-41.8767	-30.6774	-8.97985	-18.2003	-20.5162
	-34.7368	7.44158	5.03473	23.5235	43.628	15.1509
	-45.239	-57.9865	14.0757	-16.0289	-32.3319	-1.96387
	-9.69201	-11.8406	-21.6665	-61.4557	-94.945	-30.3785
	-8.20987	16.2359	-22.5844	-50.426	-65.8328	-21.3288
	15.8391	1.07784	27.2159	-23.753	-37.7653	-49.8875
	-7.48275	40.8864	16.2227	22.5414	-4.92812	22.472
	-12.8087	-4.19879	22.0358	57.7099	81.396	57.5552
	64.6646	21.3003	21.5771	42.5108	84.9349	65.6547
	-66.453	16.8439	-23.8274	9.30537	69.6165	-0.227532
	31.039	4.92922	18.5187	-8.70637	33.2902	-25.5158
	-23.1378	-42.2408	-14.6313	1.59679	29.6194	8.14922
	-64.4643	32.1508	-25.0584	-11.8343	-3.3455	-38.4689
	51.2944	65.4098	-7.33963	-35.4075	-48.3625	-33.7101
	-73.1293	-6.20195	4.75368	-8.95571	-16.4911	-10.0457
	44.2359	-21.9582	-12.6293	1.73052	-19.6782	-2.3837
	-26.3324	55.8849	-19.534	-14.3741	-49.3393	-32.4631
	-30.314	-76.5609	-21.6946	-29.2175	-42.7239	-45.3047
	-16.0971	-47.7451	-22.5961	-14.9206	-40.0229	-10.4634
	-32.0906	-32.0159	-4.72762	-9.60623	-54.1594	-23.0835
	31.5589	1.9935	-4.20113	-17.0602	-70.6398	-38.7487
	9.02223	-48.7262	-11.3585	-28.532	-54.9792	-32.2183
	50.2553	23.5844	-4.36313	-14.7025	-41.7392	2.11546
	85.4692	13.9726	21.1716	19.6184	-14.3338	23.4892
	-27.9779	-29.2356	20.2606	32.1744	25.0795	40.6768
	-56.2143	-46.2602	21.0559	42.8913	27.4285	55.8398
	12.6552	41.4883	12.6396	38.0675	29.0517	19.706
	25.1073	-57.5234	4.6867	21.7741	47.2919	17.4529
	9.04988	16.578	0.528418	10.0724	25.8187	-9.41763
	11.3503	10.8794	-29.3968	-35.1538	-1.37427	-29.4295
	6.14757	-34.9497	-18.5502	-28.1885	-41.5104	-13.0879
	5.39638	31.8216	6.81723	1.8561	-12.2692	-10.6177
	-23.2571	21.7261	21.7079	41.4667	55.0487	42.4133
	1.60936	0.0769799	29.4607	38.334	51.3904	69.5845
	4.81525	-47.6685	0.204824	8.09652	-8.3982	14.007
	-12.1749	9.88949	-4.70354	14.5928	-45.0852	-13.4769
	-44.994	-37.9438	-8.16822	-20.4549	-13.9476	-45.8717
	15.3939	23.32	8.71031	-20.8185	-2.98338	-8.84372
	17.7858	30.2131	0.527381	5.58037	15.8051	44.7446
	-34.1397	-16.6051	22.2114	24.922	-24.7774	-18.7129
	12.0884	62.2602	-2.16451	-14.9567	-0.966078	-25.2852
	29.9842	-2.04976	-1.33542	-49.2761	3.85525	-16.079
	-45.329	60.1425	-30.1337	-6.87068	74.983	11.8143
	16.8449	-9.16694	2.44292	14.9061	82.5306	29.2377
	-23.9102	-65.981	-29.7525	-35.7104	-5.29943	5.2714
	3.8559	5.47794	-15.1387	-29.5305	-46.0657	-24.0343
	-27.5007	-9.25409	-12.243	-16.0866	-76.5483	-23.9733
	-36.1021	28.5121	15.3097	-2.08994	16.8176	2.22155
	31.076	9.25743	7.85741	26.295	63.8118	0.835256
	-15.2011	-9.44393	-2.22099	-7.08812	-26.9114	-2.75945
	-30.9481	21.0433	-11.6347	-35.3234	3.50094	3.99986
	8.23037	-42.391	44.947	39.6047	63.6618	59.6001
	48.9621	-24.3644	30.1865	47.2989	33.7396	37.613
	16.5796	4.39966	-2.73389	5.84235	-9.84446	-1.82168
	-5.15316	34.5968	10.7647	-33.3121	4.92209	-18.0067
	-57.5846	5.03772	-25.4893	-22.0682	-5.74428	-10.7571
	-14.3802	5.93161	4.71417	-8.71427	12.8198	-14.2545
	-12.0614	5.71982	9.20184	23.9503	19.7674	-9.18912
	16.3309	-38.6385	15.1678	15.8588	5.73243	-2.16176
	-36.6318	24.1536	23.7224	-5.26082	-16.5019	2.72459
	18.9506	-0.779483	0.621554	8.95088	-5.72146	-13.793
	28.3008	41.5835	-9.41082	-4.8104	-36.3199	-51.2348
	18.2986	44.5821	-6.37898	-9.85531	-22.1768	-13.0602
	24.8657	-7.38306	-5.00454	16.1849	-2.86717	-15.8158
	-12.8691	-48.855	5.85061	-1.38789	15.1695	-7.34484
	-36.9068	-39.9803	-3.78024	4.19734	-18.0252	-5.53986
	-9.38841	-5.35843	-6.1384	8.10344	5.26652	11.832
	-62.1023	27.0161	-2.87083	14.7478	-2.2293	10.1971
	61.6593	-61.498	-31.1177	-3.21854	8.14643	-0.176177
	-31.534	44.3829	-28.9366	-12.7259	-17.9302	8.61747
	36.7626	-60.3205	-12.8887	-26.4312	-23.4975	-15.9314
	-42.6757	-20.1481	-26.5393	-40.9511	-78.119	-51.338
	-0.666257	-5.9587	24.8418	-9.37725	-70.3935	-42.3815
	55.3645	17.118	24.9886	27.4947	39.8084	44.0255
	49.4596	24.1818	5.42783	43.8202	43.9971	50.6809
	-47.3204	9.91859	-5.50504	2.44174	26.7745	25.7575
	-37.0183	-12.713	-3.93456	15.7267	56.7392	11.2366
	42.7641	-19.54	10.7581	-20.837	-22.0829	-27.3525
	-17.7884	21.0712	-15.9437	15.3032	16.0269	17.4031
	-24.9178	-0.834695	19.271	32.3406	57.5201	24.8052
	-24.4852	9.68621	23.0684	28.0814	69.4603	38.823
	41.1318	14.9393	-14.8863	5.07517	8.87605	10.0381
	1.69912	-23.1097	5.21435	-29.2265	-29.7101	-19.256
	36.5091	-17.941	5.05297	-17.1037	-39.1321	3.49691
	26.4515	41.2954	-17.5131	7.55511	9.66621	3.62916
	10.3586	34.82	7.25263	8.70156	-10.8317	-6.97243
	20.8145	28.3079	-13.6735	-26.59	-16.6979	-31.3767
	-3.12538	-20.0731	-26.3462	-7.92212	-47.1058	-28.1276
	-15.6436	-27.8108	-2.02593	8.97556	5.1568	14.7224
	-24.8593	-21.8127	16.8826	-5.1295	32.1768	12.4097
	20.0766	16.5346	9.80691	-12.4453	4.95222	-6.26069
	-69.8358	-17.7217	8.3407	-17.8265	-38.8147	-34.4599
	8.15645	-45.1736	-0.252039	0.880852	-21.2974	-0.0281633
	-11.3715	13.4403	22.4422	10.604	37.9633	0.845188
	17.1209	40.4066	-16.2053	17.4628	27.2727	16.5313
	-17.6582	8.34886	1.79055	-8.6361	-6.03806	-17.0677
	-24.4378	38.4331	-29.8735	-21.0426	-17.2354	-27.139
	-4.85856	-6.05732	5.35448	-20.3058	-57.1213	-11.7594
	13.4011	-2.96799	13.9937	15.4237	-10.4421	-44.8305
	-11.6008	26.0126	24.1521	9.52917	32.7633	59.2548
	16.2209	3.63718	4.88536	5.79394	13.0326	20.9626
	-98.8024	52.2047	-28.0084	-20.4837	-2.85997	19.2588
	-6.78578	-1.45619	5.77398	-11.5052	-17.3871	-10.2618
	43.0401	-12.1017	-0.764556	29.6223	20.2433	20.324
	36.2833	82.1263	11.1121	12.5175	-11.3151	-4.12885
	49.8431	-59.9156	31.7323	34.0461	16.1364	22.6558
	17.4901	-11.8047	21.9711	8.59924	15.1849	23.8077
	55.3925	13.0959	-26.9359	-2.80048	27.9767	31.0811
	-46.2973	-8.68915	-19.1575	-22.0416	-9.23502	-6.93709
	3.8417	-2.95836	-4.06854	5.87023	33.9754	11.3578
	-19.5012	30.643	15.5265	32.8602	64.0179	36.1165
	22.7122	12.4021	-2.257	-17.3854	-10.1297	-4.00607
	-51.8359	-15.4598	-21.8252	-32.3249	-2.7257	-12.177
	-38.1911	27.8434	-6.07348	-15.5225	-33.676	-42.5342
	77.5986	-10.4249	-36.4129	-41.9005	-86.9196	-52.4646
	4.93804	-81.6629	-19.1034	-15.0028	-62.8903	-26.8858
	-28.7057	1.30298	-13.5019	-9.90913	-10.155	-4.68401
	5.79131	-9.53074	29.5229	21.8149	-4.79462	29.8774
	22.8228	-18.7488	-4.50119	26.3099	17.1408	27.2152
	35.3462	19.19	6.87938	10.6991	2.80607	20.5855
	15.4066	-14.5672	-3.37925	3.6426	-61.5959	-6.50404
	38.3456	-51.447	30.4879	16.4934	14.6624	14.8666
	33.8042	64.0715	40.6572	58.2005	142.222	83.4686
	-38.9347	18.8211	13.1476	32.4948	108.491	64.5012
	-36.2215	4.59457	-16.5268	-15.626	41.0927	11.061
	-44.2049	40.1534	-17.7337	-0.70457	-0.315216	-25.9705
	-30.8322	-41.1414	-4.91009	8.66527	-91.7709	-38.6287
	-16.5182	-27.2551	-4.49483	29.743	-12.3655	9.56443
	-4.69181	-37.4536	1.83065	7.07991	-14.1488	6.84769
	-16.2299	34.3285	-3.48131	-19.29	-54.7027	22.9504
	-0.0288454	-41.5778	0.249369	-11.667	-46.3454	-30.3113
	-33.4785	0.785098	-2.79713	-11.5647	-10.6503	-17.6501
	69.5941	9.16106	-1.37548	-21.4423	-15.4759	-15.5749
	-31.7537	-14.4495	-0.557716	-4.10851	-19.1554	10.5487
	-15.4976	8.63368	-3.98989	-10.9673	-27.8227	-11.4213
	14.5853	-31.3157	6.65875	-15.8415	-23.8164	-2.63174
	-16.1083	13.5238	3.1897	9.32647	2.94078	9.84514
	-69.8219	-51.3846	-8.42366	-23.4504	-58.4921	-24.7157
	21.6136	-13.7943	-11.7074	-16.163	-33.1014	-13.5319
	39.0866	63.913	33.7645	17.7187	43.8165	24.0997
	61.9738	-15.3673	22.8969	40.1399	91.7205	56.0683
	-28.2241	-37.1376	-2.18336	-10.6211	-0.507478	13.8225
	-2.98853	-7.50095	-39.3996	-45.9045	-49.9607	5.95117
	-77.0677	-46.0548	-30.9436	-58.035	-66.1859	-69.5906
	-56.9872	-39.0416	17.3046	-8.261	-2.01341	-22.4655
	123.99	60.8469	35.0799	15.0161	80.5807	10.7771
	8.12955	-14.0939	2.1404	5.29316	5.14599	-21.6254
	45.9039	24.6365	-20.9989	-37.1456	-12.1577	-29.184
	-0.968258	4.12785	6.36615	-6.71047	28.7249	-24.5277
	72.0861	21.8667	29.1751	26.8696	5.02386	45.5326
	53.9734	37.1416	12.6287	32.2302	57.1579	40.555
	-38.3973	-55.7486	-25.9777	-35.2581	-12.9634	-35.3268
	-18.5794	-16.4058	-10.3125	0.900494	-43.9125	-44.3032
	-66.1901	15.5418	7.3524	-2.12268	-20.403	12.8696
	-36.0921	49.5278	14.7813	9.75288	-19.8455	-20.1741
	55.8571	65.3383	15.4281	-4.50836	-37.6955	15.0697
	-1.28119	-90.1176	18.0172	24.3017	88.856	9.35495
	32.0286	92.9525	57.6356	87.3459	153.403	93.4482
	-0.728065	51.0041	-16.0394	52.106	83.8564	23.6597
	1.25055	13.1582	-16.3775	10.4114	8.53156	-7.57695
	25.8718	24.1494	1.20743	-28.8969	11.2491	-6.08761
	-2.31675	29.7114	3.90955	6.99728	22.4973	-28.0265
	23.8551	-26.2817	-10.3796	21.7578	-14.2056	18.5908
	25.8413	-10.1864	-38.049	-32.4545	-58.2855	-31.2068
	17.1431	47.0034	-43.0615	-44.9288	-80.8036	-54.02
	14.0654	13.4375	7.05971	-2.3907	-38.0093	-21.7868
	32.5978	-33.9297	18.0967	32.2581	34.9767	10.464
	-12.751	11.4344	26.7499	23.6515	43.8509	35.3896
	-47.1952	-22.3165	-17.0396	-14.5034	14.6718	11.2061

## Sheet: C2
	Fig 2A: Left LGN	Fig 2A: Right LGN	Fig 2B: Right V5	Fig 2B: Left V5	Fig 2A: Right V1	Fig 2A: Left V1
395 data points	41.9132	22.0562	24.9164	31.3483	17.8337	47.1853
790	-39.0994	-32.9345	15.014	-0.731288	13.3388	11.3381
13.1667	-59.2196	30.5728	-26.0747	-16.3693	-21.0272	-12.512
395 vols	-10.0635	-14.415	-45.2073	-35.4184	-8.58407	-47.3187
	21.6542	16.2926	18.9762	4.5517	51.5864	35.565
	49.4757	-14.9455	39.2718	21.9872	18.8011	-28.875
	-11.0226	26.9225	6.25573	3.66208	25.7702	-14.9279
	20.0573	-8.51324	38.7313	40.9462	-4.96663	4.07725
	-10.7578	19.3248	-7.51842	-31.0668	-43.6592	-67.3534
	-2.95183	-80.5567	-20.4102	-23.0517	-30.3226	-39.1871
	-56.533	-24.7588	-47.0729	-7.71768	-23.2125	-27.942
	51.3209	29.3865	44.0411	26.3806	6.5648	55.3996
	31.2916	50.6111	12.3704	35.5723	26.0893	44.9938
	-16.3759	-10.9562	21.9072	10.237	11.4275	8.63155
	-11.8837	2.15106	-12.0045	1.10342	7.19669	14.427
	-3.00295	-48.2792	-16.9752	-10.9679	-21.1568	-30.3396
	-40.5275	-21.025	-43.4135	-22.5675	4.3678	-28.9771
	50.4921	28.253	23.3599	5.19476	32.3029	-45.8876
	-50.812	-38.963	-30.8365	-23.4809	-10.6209	-25.8577
	-9.43487	-19.9857	2.7577	-0.365248	-3.7195	-9.1092
	-19.9035	20.3816	-14.9105	-6.71581	-8.45396	-14.4828
	-3.39651	15.438	-7.37804	-23.9404	-9.90532	-38.3974
	-18.3297	-1.95611	8.49187	-11.4229	-16.9134	-21.2529
	-43.4673	-7.91607	-12.406	-1.26142	-9.73043	15.2375
	23.7303	-35.269	15.6265	6.19098	10.11	4.006
	-14.6757	-15.613	-9.99236	-1.36112	3.01057	-28.1603
	-11.4283	-28.1724	-30.7719	-13.2407	-26.5873	-10.0181
	26.5068	79.8536	9.80554	7.84128	20.3089	26.3254
	0.285695	46.0188	6.2443	-22.4764	-12.3026	25.5824
	27.6888	32.9587	-23.9185	-1.23444	-17.5329	13.4587
	18.8852	-23.0209	-37.7288	-22.9789	-6.60397	-31.7636
	17.5856	32.0402	-14.1032	-1.37923	-30.8824	-12.2083
	10.3166	23.7296	9.65753	26.8559	-13.4201	49.0667
	-27.8544	-20.0758	58.0279	54.1543	-15.3724	34.8554
	7.3632	-22.8352	-16.4004	7.52818	-18.4559	18.5706
	-23.7813	-32.8501	0.620182	-3.30517	-13.908	16.5553
	-26.7635	-25.1033	9.65977	0.31399	26.6463	35.7927
	-27.9721	4.47197	5.98685	12.2772	10.2187	54.5942
	2.92483	25.47	-2.56773	-3.53456	61.2443	-3.641
	-3.07522	32.9148	8.18178	-1.16543	-9.73916	5.11548
	16.4231	-13.6418	6.13948	7.78019	28.024	4.60392
	-16.8631	-4.84418	1.39219	-0.498677	-6.70895	20.0002
	27.4822	-37.4168	9.02348	-23.87	-23.0612	13.8749
	-17.9	6.98833	-28.651	-26.9636	-46.8041	-2.33805
	57.4748	5.59651	-10.1706	-23.8137	-6.48175	-23.4972
	-23.1833	1.92435	14.4678	12.1062	21.8499	-12.3223
	-32.954	-2.56082	34.7499	11.8946	18.1082	39.5395
	-9.32344	-12.3468	-8.93873	3.48622	-31.0638	-48.5591
	18.4966	-36.0525	9.71536	4.25215	-54.6492	-35.1562
	-31.0327	-13.5581	31.9857	-2.31108	-21.4004	-30.3466
	17.5212	104.124	28.9015	18.0388	33.8283	17.5832
	47.122	68.2957	29.108	39.5996	88.5157	68.9121
	34.3888	30.2108	12.5912	18.3357	27.6145	9.29135
	-32.0953	-55.231	-23.8517	-22.2959	20.2709	-48.2593
	-30.4622	-49.6691	-43.0264	-16.4568	14.5276	-38.0597
	-27.5698	4.96215	0.323949	-14.3555	-10.7622	8.41818
	-7.59118	-16.5258	40.0337	20.42	49.6194	-0.950393
	82.648	-7.43399	4.60263	31.0686	16.0655	26.4398
	-1.70927	-20.9812	16.6159	-8.72965	6.22176	-26.6209
	1.01565	18.7816	19.4939	-4.99011	-21.8064	-17.0847
	20.507	56.6617	-32.5948	-16.0001	-18.196	-30.5503
	-36.9992	12.8128	-19.2483	4.62203	-4.71016	12.2864
	20.0246	-12.8344	4.78455	17.5986	-24.6473	7.72663
	-4.99489	21.8276	46.797	14.0689	-2.79553	12.0056
	7.34034	37.3124	32.0838	29.0261	15.1779	-13.8122
	11.726	-22.2181	16.0671	2.91891	13.7247	-19.9185
	11.9759	-46.5658	6.62851	5.83755	21.5468	22.062
	-11.1166	-44.4931	-47.1582	-26.4402	-12.0972	-5.50474
	-34.3719	-30.759	-13.3614	-17.7392	-5.23013	29.8162
	-13.439	-36.535	-57.2396	-20.5356	10.054	25.5129
	-71.9196	-31.9219	-58.2449	-11.3717	-54.4513	1.79448
	0.054782	0.905024	-54.0852	-37.3621	-44.4325	-30.4445
	-7.54754	-3.95807	-19.9252	-1.5697	-21.9001	-29.9002
	34.5771	10.7391	20.0647	5.24228	-9.65295	62.0138
	37.8627	9.71375	-20.8596	-1.58695	-28.7711	-32.1251
	5.12793	-3.74567	18.8243	-1.57117	-18.7175	-31.5271
	-15.0986	31.4173	37.8856	12.2966	29.4319	101.891
	11.1074	23.6897	52.7719	45.2448	49.5767	49.2764
	-76.8348	-20.4093	14.6247	-4.5445	24.3683	-2.9541
	-0.814226	49.1801	12.1842	8.43929	-33.0337	21.8511
	-36.6285	46.642	13.2861	35.6311	64.9726	69.4858
	45.7959	24.8025	2.19243	7.52905	21.3447	39.8987
	0.86825	-7.56425	-19.8976	-6.27994	36.5374	49.6762
	39.2866	35.8507	-15.9255	4.82407	-29.2121	-49.1945
	-5.89706	-40.9138	-19.8105	-33.4507	-45.866	-43.7339
	31.7493	-14.2384	-3.80372	-2.79081	-12.0458	-9.79755
	-8.83433	12.1665	-34.9452	-22.159	-23.3393	-68.6958
	37.8483	0.661625	11.4536	1.55744	-30.1597	9.48662
	-43.3306	19.6042	10.7696	-2.90701	15.2246	-38.391
	-7.46006	-26.4038	1.83231	-9.30501	23.9864	9.18735
	-1.20439	-32.8711	-16.1242	-23.6559	-37.7523	-9.83145
	-18.0468	21.2311	-2.04295	-15.8855	-23.8597	3.64084
	8.4053	-12.0842	-23.1361	7.75384	17.8412	11.6433
	26.4918	-48.174	9.6435	9.93189	8.8188	0.466463
	23.0432	36.1186	-4.37222	21.9375	15.9522	40.8093
	-3.51606	23.6851	18.3951	42.4802	35.4811	67.5153
	-2.62942	-19.0854	29.4407	3.56591	13.0863	2.4178
	-2.4277	-70.5061	-38.2867	-10.4372	-22.1452	-66.8173
	-15.781	23.4571	12.2794	-19.636	-6.58751	-55.8897
	21.0151	-33.8117	21.7689	-6.98216	47.4335	6.39648
	-16.1228	15.1407	20.2701	-6.56034	7.77697	-1.78116
	55.5104	-31.673	36.9618	19.5974	28.9287	18.5965
	-19.1628	9.06688	49.4905	10.8146	34.2062	17.1211
	5.32104	28.5947	11.8362	9.71823	29.2318	33.5121
	7.97483	71.4179	10.6162	3.72177	6.75484	-18.6351
	-2.98438	78.5233	28.7091	26.2433	15.6779	14.4631
	-11.0818	47.212	-13.125	-4.94383	1.40379	-33.3317
	19.367	-37.8385	-13.2881	-23.3941	-3.93683	4.76384
	14.7047	28.2218	2.70622	-25.6351	7.52141	-8.60179
	5.59357	9.14967	-19.4464	-13.3063	-14.2707	-38.1637
	-8.37505	20.7895	2.767	12.7926	-0.901155	46.9104
	3.08196	-17.8836	3.40324	8.68972	8.43036	21.805
	9.28667	-53.1689	5.76986	19.6585	-8.68632	15.4117
	-24.9184	-29.3524	-1.80231	2.04227	-14.5198	-10.9203
	-28.2259	9.75913	-11.1021	-12.969	-53.7424	-62.3299
	-42.4276	-29.0571	-51.8914	-16.8598	-32.196	-13.9258
	26.9656	-15.4124	-12.871	10.3312	-19.8521	-2.43749
	11.3658	-9.69498	-26.6151	-50.1427	-51.2762	-99.8487
	-10.8299	-0.871076	1.13332	-13.8054	-39.2895	-10.1938
	-8.48943	-30.0527	-5.64325	3.84954	-1.43356	23.1436
	19.6634	8.53089	-10.0138	-5.95924	-26.6921	3.93463
	-22.9883	1.97311	-30.2257	-13.7249	-48.6618	-8.46347
	-20.8547	9.8101	2.75046	4.77119	21.9034	-8.28216
	-33.9745	-20.8285	41.6368	22.4826	13.2498	21.9907
	23.8086	22.7247	77.0297	42.0881	14.5303	4.52719
	-4.01329	-18.7068	7.85812	-3.6411	-12.8935	-36.481
	41.9694	8.94872	0.448272	3.4149	-6.07313	-22.8485
	18.938	-3.6755	-0.524718	-0.0645848	24.9709	27.8766
	11.6723	45.1432	12.0653	18.9926	60.1505	14.7666
	29.8987	9.87717	14.6336	17.2971	40.6428	72.7269
	39.4492	12.2733	20.3265	29.6613	46.4478	82.7247
	51.748	31.6278	-33.6098	-3.39114	-38.6335	7.72558
	28.4268	-1.57963	-18.4309	-23.5866	-2.73481	13.7343
	15.1817	-44.3149	-51.4474	-9.10252	-0.674904	-10.3625
	-35.5781	15.4056	-1.41294	4.24992	11.5271	11.5673
	-80.0929	15.5877	-33.3059	-1.09191	9.09971	7.46301
	-1.9336	-4.94314	-2.09252	-15.3603	-27.4085	-2.32071
	-22.1913	-10.6945	-24.2191	-2.82003	-23.3457	-21.2234
	-23.7226	-42.4081	-5.32208	13.3813	14.301	-20.8867
	6.79091	-25.2318	15.0407	-0.0116564	24.8837	11.8037
	13.2824	66.0903	50.6508	15.2597	34.7152	42.4227
	-29.1955	-41.0381	7.22137	16.1483	-25.0035	1.1209
	-15.1106	-38.7286	-22.0076	-13.6422	-44.2693	-56.201
	7.15697	-14.6238	1.99231	-11.8767	11.643	-21.631
	-21.6277	0.420544	27.9668	-3.23691	1.41166	8.21603
	-39.6616	-32.1279	-43.7387	-16.1289	-24.0537	-61.403
	-30.8385	-22.1206	-4.15654	-15.7581	-9.92722	-28.4902
	-38.7368	18.0898	-6.54535	-22.6457	11.7036	-14.4352
	-23.2632	3.72867	-7.26147	-26.2144	17.8161	14.4125
	21.8815	-27.5721	-12.5361	7.03942	1.76185	15.0386
	17.3474	-4.33012	26.5142	13.2451	8.9018	2.0241
	39.361	64.6616	2.46183	7.34456	-9.27008	-20.481
	-13.1418	-32.4973	10.3207	-8.00256	-21.2466	-5.84538
	-36.7599	-20.7211	23.6206	1.22628	-20.5314	11.0938
	5.82487	-41.0692	-11.5152	0.443915	-16.6475	-41.4403
	42.7235	22.6312	11.4624	4.65854	15.1068	-50.0763
	5.34791	-20.3909	27.9983	15.4124	18.3714	25.0856
	13.799	58.0413	6.1017	13.1106	-8.21208	49.5667
	0.419992	-34.755	-33.286	2.22172	-17.7194	14.0456
	33.374	47.5524	-0.861893	8.13928	16.6534	6.08826
	7.74739	-6.30801	29.8526	35.8835	29.4254	87.8851
	-2.31571	-1.35126	10.5175	34.0608	72.2093	56.6811
	-1.52381	29.7587	6.25745	6.01816	9.9079	49.4733
	16.5086	-1.10716	-58.9121	-34.1309	-53.1741	-38.3487
	-43.7601	-15.6457	-52.7596	-44.2271	-14.4193	-50.6374
	60.0381	-20.2253	-44.2941	-24.7058	21.3268	-23.3723
	27.2332	12.2681	12.82	31.5783	52.35	14.6194
	21.3497	63.8409	105.13	64.2453	61.3565	95.3689
	8.95755	-13.4575	13.7313	13.6494	-35.5802	2.45349
	-37.3614	-10.7699	-44.9379	-21.8696	-83.0406	-56.2289
	18.6017	-30.3537	-12.6597	-15.372	-31.9081	-47.2736
	11.8016	-35.7256	-35.224	-41.4832	-27.0839	-66.4064
	-18.6229	49.3777	0.494848	-34.0428	-17.4762	-12.4211
	-13.4027	-20.6784	-0.848966	14.7948	25.9492	-25.5977
	15.5702	27.0587	2.33032	-12.6252	-11.326	-65.6751
	-43.2266	-29.87	-2.1494	4.56124	20.9016	8.00862
	-28.3196	-39.0983	30.7917	18.3611	40.9798	32.5852
	32.1467	68.812	29.0179	32.1259	48.3377	76.5201
	46.1697	56.4445	40.0641	30.6184	-4.11632	-4.12221
	14.695	-54.8491	-12.7679	-34.3154	-17.122	-33.104
	-32.7188	-18.4103	-32.1294	-17.4607	-25.7913	9.04662
	-10.1418	-26.239	-43.8973	-37.8374	-14.4617	-22.8559
	2.53987	3.52694	-32.7663	-20.7452	-21.828	2.67217
	-9.27549	-52.3649	-7.02834	6.0023	-29.7845	12.6314
	-3.07235	10.0799	22.6532	10.6312	-35.5079	-6.14158
	-14.9504	16.8004	15.0095	-5.0408	-43.8951	-10.0128
	-8.00376	43.6168	15.224	18.0776	-43.87	30.9468
	43.1032	7.19218	19.2536	-4.44022	56.0304	-6.60054
	14.8354	29.6142	37.1181	7.77703	31.1053	33.7878
	3.41529	-19.2431	3.63122	33.2779	45.7657	21.4908
	-15.0635	45.0511	3.25058	-7.319	-20.4753	-28.3001
	-1.6187	-29.0382	-39.7015	-3.14116	7.72155	44.5053
	-16.5613	-34.5275	-10.4764	-5.98041	-22.3959	-28.1919
	-22.5114	2.55878	-0.779323	3.82965	-12.0701	1.87429
	-28.6027	-18.9999	-2.0886	20.6823	-25.9769	14.3476
	-10.708	-25.1155	-5.73123	-8.06654	-13.3841	-17.1328
	-12.8305	-38.1557	-13.3748	-39.3329	-29.3509	-43
	35.464	38.9072	-17.5288	25.2891	53.7502	33.8398
	51.3677	55.1564	23.7003	8.02945	35.5429	27.016
	5.31133	61.1709	38.3631	42.9361	88.2162	83.3475
	-30.5805	-18.8062	-18.3377	-7.26967	6.75459	-20.7259
	4.35231	-65.5192	-31.3056	-4.71607	-2.24802	-36.8421
	18.7783	41.8803	-4.23692	-11.5042	19.691	8.60003
	-19.3679	59.3047	-15.092	-9.37481	13.5664	-10.8382
	14.8276	-25.161	20.068	5.97868	6.79165	47.1296
	5.41088	8.32883	-26.8575	-0.480723	18.1176	-22.0654
	-4.66353	-31.8083	-4.73948	-8.45662	-21.5947	22.7869
	-34.7436	-53.8006	-5.77315	0.363301	11.2118	-13.6691
	26.2471	-25.3171	-38.6688	-24.52	-26.5013	-56.7566
	37.788	-55.2753	2.66863	-13.2391	20.4849	22.2828
	1.90613	-22.9718	38.0784	58.2835	11.9694	37.6653
	37.2759	33.9414	77.5741	15.5739	16.6158	21.4717
	11.2326	60.8473	49.8669	42.5536	53.1804	72.3031
	30.9291	56.6262	-6.33874	-17.379	-5.35423	26.2264
	-42.7757	44.7113	-69.7943	-47.4385	-85.6426	-65.8938
	29.3258	19.9092	-18.6551	-22.2139	-6.62555	13.7142
	-33.3437	-33.1656	-31.556	-23.274	-12.9772	-16.514
	-15.5554	-55.1023	13.1451	-18.5328	-36.4767	-7.66656
	-39.3826	-37.113	-15.5098	-27.18	-38.823	-69.2949
	-11.3338	-53.9341	-33.2512	-24.5972	-51.7023	-50.3371
	-60.2007	3.65963	-14.7864	-14.4439	-40.0901	-2.67825
	-62.3885	52.0482	-15.7128	7.42176	-34.5797	-62.4067
	-8.55534	7.64194	19.9068	19.465	8.44041	31.6011
	1.03891	-28.9714	18.2763	0.434177	7.06921	-49.3516
	43.4206	-26.1804	-28.4651	-8.64771	-22.1284	-29.4508
	-7.40818	-27.275	-12.5215	15.6413	1.60254	-14.0849
	72.561	7.28776	24.9056	2.63459	32.3416	-5.21926
	42.0634	-52.0808	26.3401	22.4296	16.4625	-13.2266
	12.0496	18.4794	102.134	35.7417	4.22749	32.4428
	6.05665	41.73	25.1431	39.9432	52.4953	56.5222
	17.6135	28.0881	28.4059	33.7359	24.0762	3.2102
	-43.0332	-13.3699	-24.3037	13.8701	1.15193	29.1143
	39.5414	47.656	-36.1398	-17.5915	10.5812	-29.6359
	-0.0342512	50.839	29.4044	-8.10413	20.9837	-11.1863
	13.5762	1.77654	14.9212	17.8481	26.1667	38.8336
	12.6879	81.7275	26.0641	4.32093	58.0627	3.46715
	5.91644	-23.7687	12.2191	-11.8121	17.7286	3.36988
	-61.3907	5.24253	4.74377	-1.66954	-47.1383	-25.1226
	-5.68761	-18.2035	-33.8538	-33.1188	15.741	-34.2762
	32.4082	47.2275	-4.10194	16.2816	-3.28685	47.3184
	27.0432	-12.0838	1.51543	4.94531	-21.9716	30.7247
	29.0735	-3.6118	2.57244	6.0316	14.6641	19.8297
	45.9999	-14.991	11.9635	22.1058	-7.82516	16.6284
	-58.9419	45.5671	37.7736	27.6979	21.8935	48.2042
	25.7755	20.8695	18.2747	10.6123	4.21146	46.4878
	3.28245	-51.7183	-11.6896	4.83914	23.9235	33.1458
	-15.6918	-27.4038	-30.3568	-15.5427	-59.2889	-44.3458
	4.92103	-22.5824	-48.6118	-60.438	-91.6811	-52.6113
	-18.4071	11.7348	-55.7275	-35.535	-50.8026	-47.9899
	-48.5336	-66.866	-25.9724	-6.00327	4.57372	-0.451008
	-70.2754	22.1326	30.0994	31.5574	47.4244	44.9584
	-6.25897	36.7015	34.8193	43.5368	-33.5011	60.5044
	-18.0325	38.781	3.67785	20.8899	4.17389	26.9462
	3.11228	-1.24698	4.84025	0.656864	-3.82009	33.3418
	-11.8196	-50.5022	-22.6667	-11.8899	21.5364	-3.25061
	-6.59535	35.3388	-16.5503	10.6787	-5.21087	14.2389
	22.2288	-18.0829	-36.9558	-21.5299	-11.3609	-7.22522
	34.8069	19.5679	-23.1871	-4.39944	-13.1531	21.0303
	-11.4254	-17.3729	-18.7902	-22.403	-6.62368	-31.6003
	-41.4348	3.29574	18.9149	-1.36783	-1.01068	45.036
	28.3266	15.18	-4.70854	2.63079	-33.6516	-20.7031
	-30.985	-44.6418	9.57913	-9.09429	-14.0105	-42.8193
	-0.676192	1.07015	25.5031	-12.8141	-14.6601	-59.7311
	2.94426	-21.5208	24.3511	4.14142	11.8566	5.92461
	35.993	25.2404	43.6126	2.00706	51.8358	-32.0669
	-32.4207	-16.9802	12.0182	2.08346	14.9323	-15.1494
	12.4031	-0.902634	42.3416	31.9414	49.1249	15.2456
	17.7101	14.0135	33.3067	11.3355	23.408	25.0737
	27.5757	7.57046	-6.1174	-4.91675	6.1696	12.8289
	-2.72356	53.2183	-33.4665	-28.0205	21.6786	-13.7458
	18.2945	-46.0505	-75.368	-45.9511	-46.4648	-37.0099
	-90.567	-14.6988	-45.0628	-32.6294	-25.3976	-34.3059
	31.5934	-3.82597	-31.4955	-40.0723	-18.6082	-50.1153
	26.0615	9.88374	5.71486	-3.84943	28.7678	-13.3558
	8.55174	2.65025	28.0717	25.9327	2.38501	41.4211
	-21.3642	-50.1767	45.9496	18.7911	26.8841	28.6611
	-16.9309	7.38927	11.1253	13.5518	-22.1453	18.2037
	-19.5867	26.3381	-10.4095	3.48634	-37.5159	9.18466
	4.30513	-71.7187	-18.254	-5.70376	-1.29128	-37.2172
	4.25281	-17.831	10.8572	24.2755	33.1466	31.7409
	61.5995	-34.8347	-14.2227	4.29156	5.28792	6.91494
	22.4729	27.2494	22.1024	28.8599	29.339	20.8459
	-5.43185	-49.2087	-19.3449	10.0182	-2.03383	8.66844
	-16.2148	-16.1153	-27.3506	-22.917	-33.6076	-28.6688
	23.9555	-18.5128	-38.0277	-7.64952	12.5417	-18.9513
	-9.49218	26.1786	36.4602	23.6019	-1.8214	15.6894
	-0.814235	36.5667	45.9911	20.3645	9.15539	31.5426
	30.7809	27.17	-3.99215	-12.4741	-14.634	-27.1336
	-68.5141	-97.0644	-56.0331	-43.8706	-43.1158	-81.5802
	-31.9972	-64.6389	-14.5994	-24.3441	-49.4615	-35.8774
	50.5039	32.7425	-1.64702	-7.96944	-24.1217	-44.3215
	13.1474	-47.2125	-21.5421	-3.32872	-6.15757	-12.2344
	-45.1871	65.2689	22.1316	-1.55024	-13.0633	-0.368952
	-1.57818	14.5256	12.2897	16.7476	-9.18633	19.4086
	-59.8284	-2.69169	28.1552	13.4423	50.536	7.22144
	-32.1009	80.6965	4.08162	22.7075	-18.3978	11.2554
	36.1266	6.28173	-17.8429	12.526	-5.43466	31.2305
	52.4849	-21.4328	-41.4037	-18.5988	4.30867	-44.2156
	10.9403	-24.7614	0.795764	-6.2669	29.2208	4.59013
	5.62117	45.0382	33.4641	28.1485	53.6118	32.2717
	5.71303	38.4433	55.2293	43.4081	33.0647	56.5981
	-6.91115	52.3412	22.9703	17.617	52.3509	36.9677
	-0.477137	22.3871	8.25176	21.2137	-14.3884	-2.47092
	-9.62228	-72.4529	20.2811	23.0798	42.6804	5.26381
	3.34531	6.96779	14.525	-8.83101	-8.37445	21.8704
	-17.0781	-8.60783	-30.5676	-24.7618	-39.3068	5.24505
	-1.29215	-28.5883	-40.8267	-12.9097	-51.7484	-9.15515
	-11.1612	-55.1928	-14.0588	-19.954	-16.9025	33.9041
	3.51054	31.8592	-1.63334	15.2976	17.7498	34.7799
	-9.17055	8.52314	7.39333	-1.71206	8.3057	17.4214
	-1.76634	7.83213	-13.1366	-3.75275	6.65877	-3.33274
	-17.5032	13.8295	-21.2775	0.0132705	4.39679	-43.7834
	-22.7212	-18.4798	7.38105	-6.63325	21.8817	-10.6526
	0.152891	-18.4815	51.602	33.1316	27.9359	50.0006
	68.306	-4.87756	40.5015	6.67786	9.41641	29.2918
	26.9178	8.68293	16.7196	-5.79789	-14.7904	-6.77573
	-19.7844	26.8564	-0.20003	12.0572	-30.9238	48.2427
	-21.6135	12.4151	-28.9107	-32.8411	-22.4095	-33.7209
	-37.1359	-6.12881	-28.9571	-39.368	-75.4724	-32.6075
	34.944	-2.59155	-23.193	-30.1234	-57.7931	-24.6332
	24.2537	93.2959	-6.95458	23.6285	39.6132	17.4079
	-1.82858	33.6934	27.7794	51.208	54.5009	79.3178
	47.3921	5.07281	-23.6276	8.63109	-35.2551	23.2078
	-6.9073	-33.6123	-40.2572	-24.9782	-35.7305	-32.0199
	-3.22597	33.0466	-26.071	-35.6304	-24.047	0.0141166
	-4.36922	-15.9277	6.42377	5.3895	-5.91931	17.7252
	31.8841	-37.1871	6.99606	5.40181	15.7676	7.05208
	46.964	-0.890224	23.8987	-2.78331	2.92214	-1.19206
	-46.7978	-4.41727	-23.3695	5.12708	-21.624	-52.4321
	1.40746	55.3695	50.8717	36.8452	19.6992	69.5885
	-25.2169	-7.27407	17.4675	4.71673	17.9356	-44.1624
	24.4286	15.5021	-11.1969	-11.8377	0.0549202	-38.9895
	-32.9809	-58.6679	-16.6651	-9.42183	2.73129	-44.3961
	3.44288	-38.1337	-3.8708	5.14872	-2.15516	-23.6179
	27.2967	-46.2696	28.3482	-14.8198	27.6536	-8.08113
	5.60114	46.9669	-15.8057	-7.69737	17.6015	12.8766
	-7.52247	-12.372	-8.31187	-4.72578	17.5993	43.5047
	-10.434	-27.3612	9.40943	-1.05414	-9.96327	29.8213
	-38.8895	1.34595	-8.11023	-5.60711	-46.7984	-8.74641
	-27.9113	-21.5027	8.99544	-8.16732	-0.617067	-41.3358
	23.6661	27.6038	7.56606	22.2236	-12.5603	5.19888
	9.1571	4.57951	-9.88239	-20.6446	12.1891	-57.5652
	-0.80846	28.8781	-22.9915	10.9387	-10.3641	61.4245
	-18.2988	-25.8444	-13.7973	-15.6621	6.44777	-9.11929
	24.7268	-28.2719	-6.01719	-22.2121	-28.0527	-46.7151
	22.5284	-49.8845	-37.5747	-21.7517	2.75452	7.52979
	38.1341	-1.82355	5.07417	-9.99923	-19.5344	15.7205
	14.9838	40.3324	-8.60183	11.4888	13.8014	-10.6005
	-73.9575	39.4071	57.5827	15.3344	79.3784	61.9594
	-9.85841	50.4685	11.4795	5.47418	53.8297	-9.97933
	11.4974	5.72299	-67.9456	-38.6626	15.6907	15.9089
	13.4351	-39.3269	-51.415	-43.4029	-4.93044	-57.7756
	-35.6105	-6.47259	-16.1497	-8.01533	17.2594	-25.4824
	-25.2445	6.03184	13.9494	10.235	-7.39007	-7.83012
	-22.2597	44.4391	42.9156	36.7045	26.8757	31.1389
	36.8801	-21.5421	44.38	31.6788	73.2789	4.65385
	11.7785	-32.1195	36.9379	6.87426	-14.1662	0.19749
	43.5214	-18.8224	23.8631	11.5152	13.2115	-9.13504
	-6.76754	58.9945	70.0602	38.0113	23.8222	40.1943
	-45.7368	-30.7608	18.2842	0.749963	-20.0826	-48.2603
	45.384	-17.6712	-10.7593	7.07548	12.7696	-4.29431
	-24.4978	24.172	7.54748	6.92107	-22.211	17.7178
	-4.36435	-10.8214	-14.9722	5.8485	29.4282	50.4447
	17.121	18.0635	-0.484059	-4.86495	29.2806	-18.0883
	-5.2219	12.434	-44.1012	-27.0582	-31.4845	-19.1542
	-1.96655	-57.5091	-47.3535	-10.454	-63.3556	-31.9848
	27.5356	-8.66022	-48.3121	1.9195	-18.7742	-4.86778
	-25.1491	-25.7482	-21.2823	-8.43313	-51.4531	16.7845
	-1.06799	-60.4008	-30.0349	-12.7797	-84.4593	-31.3806
	31.6936	-60.7819	6.53248	-9.23852	-33.0977	-45.267
	-41.0713	-24.1754	-0.123933	11.624	-46.7782	7.26974
	-27.8434	-0.38739	46.8257	20.3884	-18.5621	8.68594
	22.2191	24.7228	21.7558	-4.05041	-7.83926	-21.3902
	7.51144	39.5514	-7.69477	7.57487	-3.4762	14.8992
	-59.6303	-28.2615	30.7845	16.6791	20.4617	38.5734
	12.8206	40.6477	-3.02395	15.6462	62.3028	38.0482
	5.69516	8.69364	29.2739	12.4834	59.7887	38.1233
	28.9039	-3.11827	-12.1002	16.5376	11.6161	68.0481
	8.44126	-31.0775	-9.90821	20.5278	33.5748	-13.6455
	47.3355	14.793	52.0164	20.6438	38.0872	-15.554
	78.1347	40.0535	33.4767	1.53032	-9.98798	-1.85826
	-19.9779	24.6574	-14.4487	-7.39222	38.1215	-22.316
	-16.4088	39.7699	-5.43964	-24.307	-31.7928	-15.0733
	-6.39005	33.7661	-13.4928	-33.4491	-4.58509	-49.8984
	-35.3854	11.3571	-5.11974	-40.8235	4.62022	-4.80438
	22.6959	39.4252	-17.6765	-14.253	3.66144	10.0195
	-9.0363	27.2144	-17.9547	-27.3353	-4.7678	-6.66396
	-0.353597	-35.3048	-1.85004	-21.61	-33.8087	-83.6643
	-32.6832	7.04612	3.73318	4.99842	1.19999	11.044
	17.6589	-21.9905	23.1436	-8.63237	22.1717	38.2223
	73.5106	-2.42614	-13.6555	6.38889	9.49484	-15.3028
	34.6593	31.9076	37.7015	19.4211	44.2732	11.8588
	-24.8224	37.0733	-4.54997	-22.0199	-22.8899	23.7371
	-14.3023	-25.441	-46.3899	-22.8655	-16.8159	-56.3274
	-18.8004	-2.40969	-2.73015	8.28257	-0.690137	-17.2847

## Sheet: C3
	Fig 2A: Left LGN	Fig 2A: Right LGN	Fig 2B: Right V5	Fig 2B: Left V5	Fig 2A: Right V1	Fig 2A: Left V1
395 data points	-55.173	27.937	-12.8016	9.7212	22.6904	19.5949
790	-20.3584	-3.33332	21.8783	-4.68654	52.7769	16.5508
13.1667	7.16278	-4.18362	-5.92372	-18.5134	-14.6906	-15.5748
395 vols	42.2779	-26.8132	-38.5917	-26.1627	-12.4015	-31.0402
	90.8004	-12.6971	-14.8952	19.9822	-21.3343	-13.7777
	-18.5774	-19.1133	26.3217	-2.69914	-91.0258	-36.3049
	11.1736	35.2704	51.0153	22.713	101.753	10.3636
	-11.6468	-35.5634	22.3591	-0.860376	16.7008	-3.61246
	28.0419	-15.9466	-15.7663	-12.2952	-49.8651	-31.3302
	-20.6014	-0.0479988	3.59893	3.79614	73.9995	11.8625
	-40.046	8.356	-23.796	-2.93897	5.20552	8.34171
	-54.3421	28.4411	16.1176	26.0928	-17.0673	-1.90185
	-23.2935	51.5005	5.3724	15.4985	35.698	17.6471
	19.233	-20.3586	-19.4478	-33.0787	-16.1114	-8.95059
	-0.580672	14.397	46.9121	39.468	21.2288	46.9002
	-20.7353	-1.93615	40.2589	20.0751	17.5373	-1.23315
	15.5717	-42.0254	-28.2494	-10.813	20.9572	21.0222
	-2.08035	-58.4738	12.5431	41.9967	-1.38107	-0.978809
	-23.7158	29.5831	9.37657	1.3892	-87.5669	-46.7421
	2.20888	-58.5667	-2.09249	-11.9479	36.4353	-48.2444
	-44.6449	31.5639	-33.875	-40.5733	59.9143	7.36143
	-42.845	-9.25426	-5.22951	-20.5513	20.6995	-9.24443
	-15.0391	-53.4851	-40.0678	-44.4105	-22.4182	-42.181
	-48.3799	5.77462	-29.9045	-34.2729	-19.6909	-47.0783
	-6.86132	14.5599	-9.79603	-2.00831	-4.58133	-1.38635
	119.083	24.4274	4.73741	24.7965	41.2022	25.74
	25.1433	3.3884	39.7713	13.6591	60.6575	16.5312
	-1.49419	25.4907	5.7986	-2.50636	-12.3697	-19.6959
	28.6632	0.355468	13.1313	-0.11016	-77.8222	-34.5531
	-0.71133	-12.7604	-8.52529	13.5559	9.73607	18.3812
	26.9631	24.5872	25.3394	22.1081	49.9267	-0.726421
	-16.6897	-60.3061	30.5173	14.1285	53.5985	7.66794
	-17.5696	66.0414	11.4927	-8.98738	-21.3132	17.8677
	-13.294	5.8249	-35.1255	-8.37819	51.5304	8.30263
	-25.6022	31.3163	-1.00677	6.69367	73.049	6.14826
	-25.6481	-35.7876	-2.36926	-1.87655	-28.2355	-17.1269
	2.49605	2.14083	-2.40488	11.849	-8.55115	-11.5341
	37.1883	8.5115	0.0408509	13.4842	-27.286	10.3725
	-22.4685	1.35288	-24.8274	-24.3267	37.8138	22.7347
	-58.2988	29.7624	-24.425	-14.981	-73.4653	-7.71221
	42.8537	-7.27336	-3.45869	14.2005	42.7529	-2.581
	8.2787	20.1883	16.1436	25.7878	53.0839	20.809
	-21.2656	-36.8484	4.30241	9.02874	76.3477	61.019
	9.13352	20.118	34.0391	12.9666	46.9992	6.50128
	51.8853	-58.8166	-16.9917	6.91157	-94.9978	-7.3817
	-33.76	-20.864	-12.203	-19.2296	-94.0278	6.56033
	-59.0359	32.3329	-14.0529	-7.85086	-78.2522	-1.8287
	1.28134	-18.1101	22.1887	7.19086	16.9085	-3.69116
	-55.6224	8.27734	-14.8753	5.18342	-24.4058	-3.04569
	12.4113	-8.81578	-31.3165	-11.5624	-22.3627	7.64803
	-30.8779	-16.0389	35.9884	-14.0787	20.535	20.6509
	35.7176	-16.466	-35.3616	-10.827	-52.9217	-37.0172
	7.67762	39.3975	-4.1575	-11.7873	-32.4273	21.08
	8.68731	36.4427	26.188	7.66609	40.9878	1.3372
	-32.7331	-33.7659	-22.8282	-24.4078	-28.8959	-13.9742
	74.0918	-35.8539	10.423	-11.5881	-13.1656	12.2849
	63.9007	0.829074	6.81476	23.0508	-38.3538	-1.0988
	5.33261	43.7334	24.3213	19.6482	17.2896	6.51747
	3.94765	-55.7755	-12.2429	7.77027	38.1509	35.2424
	2.18786	-11.7317	7.15338	-5.70849	-90.9488	-15.4319
	-31.4826	-32.12	-21.463	-15.2787	-8.09794	-11.4319
	-3.99469	-37.0863	10.9371	23.0599	-26.7367	6.6144
	43.0036	-6.88683	24.8666	8.42077	-69.1103	18.2405
	-13.7563	27.0746	28.2998	38.1052	-9.46519	5.08312
	35.2393	34.3466	-7.93432	-11.1624	43.2121	18.0584
	26.629	12.7384	-14.3786	-3.788	3.55066	-15.6381
	-3.5217	-0.167683	-25.2633	-12.0697	-23.3726	1.3198
	-45.6958	32.3264	16.3597	9.76728	9.49627	8.04904
	7.24835	21.4331	-9.41319	-10.2709	53.0673	1.40329
	6.16175	-18.1447	20.4387	9.34348	40.305	23.4532
	1.83266	17.5292	-3.77224	-3.14029	36.0141	-23.1872
	-9.08086	6.51275	-3.60117	8.05995	39.9968	19.727
	1.97212	39.2659	-7.30151	-3.54296	29.5412	10.6685
	-8.85979	-25.8347	-4.0176	-7.39596	-5.08975	-36.2925
	19.2645	0.981031	-16.0954	-14.2528	5.26675	-37.3017
	-28.541	-73.0732	-33.7921	-17.2523	-42.9231	-32.3549
	5.7984	53.0411	21.8152	10.0024	21.6306	9.12366
	26.735	11.2777	-4.4233	-19.0417	9.8769	7.88592
	-32.2674	36.1344	14.0814	-7.9034	17.9842	-36.0933
	-31.7644	25.3261	-1.75226	4.26691	-26.8355	5.57133
	-35.0373	21.8223	16.9228	-7.16278	-21.513	9.17126
	34.4501	-42.3363	-45.7042	-34.6345	-9.50396	-42.6403
	-5.69794	59.4262	-37.5038	0.978296	37.1701	51.0908
	93.7207	-34.9286	0.50417	19.1219	68.333	31.4601
	-2.12545	-58.276	10.4607	9.54788	3.68838	-10.381
	49.3921	-12.4576	18.302	8.54631	-27.6712	4.38064
	-24.6806	51.7789	21.4417	-4.41337	46.6787	-9.90187
	1.36692	-19.4425	-20.7065	-16.1824	-45.9584	-7.42205
	63.1508	-33.3992	-3.65385	17.9902	-59.0202	-9.76769
	31.4269	-6.6835	38.2021	24.1892	36.7909	53.2758
	44.1982	53.8972	42.9359	37.6446	82.418	42.9663
	59.0098	-40.7879	-5.21416	13.4199	0.17178	-1.07693
	-79.5791	-24.0845	-39.099	-31.8618	-30.3606	-9.93893
	-20.7027	9.42909	-5.6637	-2.38845	9.21056	-10.6817
	-36.8289	-1.04458	2.57097	-2.04625	-28.4787	12.1106
	-25.2866	3.949	-17.8771	0.979022	-57.4039	-31.4586
	-31.8665	-43.0859	1.09019	-5.70256	28.9065	-12.5475
	36.6061	-43.9398	10.6211	2.92953	-35.5925	-16.4503
	-23.9522	-15.9093	-18.9394	-30.1569	-76.8127	-22.3133
	-9.38513	14.8289	-13.7057	-22.7616	-42.6997	-11.1637
	-5.62291	3.83231	8.21149	4.07337	-9.33589	-10.0597
	-71.8789	-1.11322	23.433	3.5815	19.7526	26.8596
	2.5959	72.8931	12.8702	32.4116	35.3732	21.7515
	-40.9596	40.5345	-36.6064	-8.946	58.7973	13.9555
	-23.7528	34.7067	-33.321	-26.6457	19.6489	-22.3875
	-22.7637	-10.2683	-24.0694	-10.9632	-90.6876	-30.1315
	27.6889	46.2277	-21.9473	-10.8902	-76.9672	9.08819
	-15.5859	15.3223	-12.3572	-20.7088	8.42063	-32.4251
	-0.725646	-44.1032	-8.11386	7.87818	-3.55296	-53.7098
	16.456	-13.8699	57.3293	29.8183	46.0101	44.1773
	30.0958	-12.332	26.8797	7.52468	97.5628	32.5486
	-6.37827	17.1049	3.52546	-3.95955	62.4287	-24.8284
	78.0863	-36.8225	-12.2509	-7.63093	8.25556	-34.7837
	66.2175	-12.3449	30.0857	25.5901	-19.8128	-3.79786
	-7.43966	7.07293	-7.65486	-0.969469	23.401	44.66
	-38.698	-6.75683	6.4233	-17.6638	7.26229	13.1627
	38.7363	-14.5437	-11.4518	0.390528	6.73485	-42.3317
	-22.9814	-36.1935	17.4357	-1.74275	-27.7122	12.4567
	-18.8755	-26.1012	-11.8041	5.83637	-52.577	-8.00772
	2.01563	16.6296	16.5824	-12.0355	-44.2219	-0.68956
	-30.5917	0.580143	1.8315	-7.17546	19.4384	-2.52523
	0.940647	11.0372	16.6928	33.1273	39.8985	2.84567
	-30.5774	26.6907	24.409	5.36761	-34.1286	11.7728
	-13.435	-29.3518	7.16778	11.9746	-54.4926	-10.6101
	-14.4449	-37.6503	33.8058	28.104	14.5939	12.6096
	-58.8919	74.074	50.4612	31.3174	28.7975	26.7301
	-11.1422	-17.8456	-9.6981	-2.9635	14.6684	25.9997
	34.052	64.2495	-9.64911	-18.8972	-68.2773	-35.619
	38.1183	-34.2236	3.11268	2.11565	-43.6965	-10.3033
	-6.64191	17.7372	7.84676	8.66767	41.942	-3.4766
	-30.5359	3.41473	-6.83128	-23.5583	-17.2426	1.59041
	-23.1448	-2.83612	2.38943	17.2384	11.3122	16.4597
	26.5213	-2.28382	-10.1085	0.531094	37.0608	2.28045
	8.21116	5.99843	-30.5834	-22.5147	2.82698	16.5122
	60.5449	-23.9842	7.58029	9.21505	34.6297	-5.08554
	-13.8299	-10.514	-32.5955	-20.4118	-26.5154	12.1223
	-6.68308	-22.5513	-11.5154	-30.3431	-9.42411	-5.45112
	40.0235	37.5539	-15.5614	-32.5171	-37.4905	-13.9802
	3.51045	-3.7881	-15.4604	-11.7186	-18.3267	-2.08609
	41.357	-4.97593	4.46148	8.65884	48.9943	11.5502
	-52.6792	-38.3726	13.2297	21.2939	17.7453	9.28679
	-19.2237	2.98091	7.15423	26.0744	18.0802	-1.08838
	28.5887	-22.6803	7.14923	-5.1138	72.1095	27.2473
	-14.3846	-8.0442	15.5413	13.146	-6.86623	32.4515
	18.4141	17.7448	-15.2907	-3.59008	-18.0713	-19.8858
	28.0505	8.85496	-3.57428	-14.8549	18.9069	13.7886
	7.85449	-25.4498	-62.1044	-30.506	-58.2529	-21.4551
	-33.8677	-32.5259	-5.20412	7.88172	-62.6397	-17.7473
	10.584	28.5548	-26.1259	-10.9345	7.88866	22.5018
	-60.1844	7.68018	17.1722	2.7756	39.4505	-6.5404
	39.9753	25.6135	4.0593	14.752	-6.32853	1.44672
	-18.1295	-4.13354	-15.3405	0.766041	-97.0908	-34.0578
	5.98435	30.7842	-2.03301	6.37595	-44.7808	12.1799
	3.97497	0.0157117	-35.6608	-8.66414	-21.1625	7.93097
	-33.1772	-36.7826	-2.0265	9.49354	-20.6542	-5.57032
	-22.7993	-43.1659	-8.74293	-20.1059	-18.3316	7.99752
	27.7151	83.6104	-22.4282	-14.5038	-55.0633	-21.3107
	-4.41713	-28.6019	-24.1805	-15.4277	15.4349	-1.16858
	32.5737	-51.6949	4.77908	4.04807	36.7407	12.6673
	52.9249	23.6287	20.5424	2.0459	46.5863	42.0466
	-12.4026	18.1767	0.837492	-8.28777	6.23495	4.70951
	46.6409	-1.31157	28.9755	17.8397	43.2506	30.4233
	11.1268	44.3184	30.9154	40.171	6.1103	53.1842
	-0.111471	8.92348	78.2992	79.0646	-18.7979	0.960715
	-15.9916	-95.3553	-6.07102	-11.6672	-10.5596	3.46889
	-6.74766	48.7775	-20.2884	-24.5435	-84.4879	-28.4274
	8.05765	2.87394	-22.211	-12.3564	-8.41294	-28.2457
	33.2082	-17.8192	-2.5706	4.92888	-5.95078	21.5546
	26.4411	5.80654	29.1313	41.9906	53.3927	22.2724
	42.2996	29.0174	30.8403	4.60759	43.2044	-4.46499
	-80.6571	-13.792	0.847029	-4.65068	14.182	-17.785
	-68.8102	15.9634	6.46691	3.56107	-17.2601	-33.2438
	-24.3747	-2.79236	1.9197	11.9822	15.2193	47.004
	-21.1461	11.0851	11.7402	14.1502	70.5565	21.5437
	38.4836	74.297	7.15958	5.79477	95.5006	2.93744
	-19.5546	25.1157	-24.8888	-27.9923	5.0548	12.1858
	25.4223	6.12199	-40.0581	-36.3067	31.0356	-28.1419
	-15.6389	20.6088	-22.7592	-16.4426	3.59777	-20.2618
	-13.499	-47.0564	3.05944	-24.6887	-67.3564	-19.3633
	40.8915	19.1172	42.4923	12.3241	-15.1331	-18.5321
	6.79394	-65.317	39.6731	34.5389	-21.6548	3.19665
	39.2033	-4.42906	41.3498	37.0016	-13.1375	-25.5818
	-72.5047	-36.8168	9.36449	-19.4601	9.77707	-56.6909
	-44.5418	52.3764	26.0794	0.398166	-73.0917	36.5563
	35.8607	-51.5506	-8.28666	-10.6517	-50.1384	-50.0626
	68.1154	29.7947	-15.2678	-12.1966	-43.7395	-40.2733
	-63.6548	-4.01485	-18.1291	-7.82488	29.2218	17.1608
	-71.7111	28.2936	11.8479	6.04873	-1.93604	-20.4481
	-35.5028	-42.2907	-5.66041	4.76443	9.16159	-11.0047
	39.4517	57.4852	-35.6475	-30.357	22.9652	7.14676
	43.1354	-14.6164	-18.3952	-29.273	3.15615	11.6736
	14.9892	-16.9668	-30.1161	-7.0885	34.3336	18.5164
	-16.9912	36.0785	22.6659	21.3589	98.3383	32.5596
	7.79674	-39.36	17.9145	23.8827	69.2781	21.9328
	18.3021	-4.29757	-10.7401	-24.5289	-9.1591	30.4349
	-62.1033	1.33917	-36.2894	-22.0742	29.1142	40.9765
	-2.76594	27.5061	-18.0805	-2.00468	-7.9493	-9.34502
	10.5331	-30.2073	-2.46636	-9.85233	-52.1976	2.35813
	48.9305	22.3547	-17.0221	-26.7405	-20.6906	4.14126
	-1.46155	18.4331	-22.4772	-24.4216	-35.5722	2.08869
	48.9816	-36.1987	-29.7707	-15.701	-44.2738	1.92453
	-31.9671	-18.6039	-10.305	2.36957	28.1412	-7.52823
	-12.4085	9.02623	9.37676	32.7934	-1.9876	33.7784
	-30.9932	-30.3048	27.8952	27.9019	-17.4605	7.21964
	-36.4532	56.8805	22.9212	10.2472	-3.59813	-24.4801
	-46.5943	-48.7932	12.0606	3.76991	-109.544	-12.4825
	6.01489	4.30304	18.2919	-1.86603	-118.148	-2.84353
	0.836937	-32.0729	12.0232	24.6242	17.2251	-46.4881
	-25.5021	-18.1417	25.2262	-9.11783	4.95964	-14.4813
	17.5593	-37.6233	4.35019	13.5029	-30.0924	23.4955
	57.2967	21.9274	-0.512011	13.6689	-12.9683	-24.857
	42.3608	-26.7128	28.1071	20.6505	9.59413	11.4348
	20.1242	12.2522	0.914439	24.3703	64.2563	16.6745
	13.186	-40.8717	-20.6788	-13.5596	-25.9366	-9.89211
	-53.5851	-1.78147	-32.2319	-30.0425	-32.7105	-41.9017
	-23.8764	-5.84776	-25.2428	-11.2801	-16.3378	-22.1997
	24.0622	66.3904	14.7307	9.09816	9.2397	1.72024
	-6.82775	39.6334	43.2244	32.2046	72.9947	22.8385
	51.7873	26.8837	36.9013	20.4517	102.774	31.539
	53.9187	9.18185	-11.9361	3.9813	47.2785	33.2062
	-33.7478	-20.5714	-8.8892	-2.10754	16.4871	-23.6568
	-20.3997	-47.5981	-11.5449	-31.5641	-35.0925	-60.0131
	-84.9668	-23.3265	-14.6057	-13.9449	-26.8427	-18.0579
	-33.169	-6.19108	-10.2645	-13.6001	-112.818	-5.38116
	58.6494	-22.0862	-31.7166	-36.5541	-73.7874	-26.4147
	53.5559	-2.20352	-21.289	-17.9625	-27.8559	-10.5072
	13.1576	-4.7146	-7.15597	12.413	-58.8011	-3.88573
	-4.79134	40.8542	11.9259	4.07592	18.8191	-8.3576
	6.822	-24.8878	-31.0379	-33.5602	33.8764	0.443321
	44.4163	-41.6615	-10.7911	-3.31943	-0.429753	-15.8105
	-38.4798	27.4314	-19.1041	-9.53117	18.2658	24.0476
	-11.7745	4.79099	-14.5407	6.76027	7.51318	-19.1993
	54.7966	2.48832	-17.8328	-25.8721	13.2232	26.7498
	29.8171	-11.1758	-32.8372	-10.3548	-9.91114	13.8764
	48.9283	-17.8631	25.7205	53.7282	135.762	72.328
	20.0166	-4.96494	47.5981	24.176	63.2332	55.9556
	-13.7698	16.4185	18.7064	-13.5931	15.5671	28.8128
	-42.2324	51.8911	5.34516	14.0151	118.102	6.23337
	-23.5728	55.0738	22.3789	39.922	-40.4755	15.2619
	-3.81713	15.4242	-3.77577	5.46674	1.20399	-1.01593
	13.651	37.924	-24.901	-14.759	46.2272	31.3844
	-2.94685	0.57037	2.13594	0.518943	20.8839	40.1406
	29.6785	-56.9366	-3.00909	-35.7139	-65.6612	-13.9274
	21.9487	-21.8152	12.9514	-14.7877	10.5567	-8.43056
	15.6644	-31.4872	-7.88162	-17.4608	-15.0086	-8.40021
	18.0656	-34.3463	5.75439	18.5066	9.03907	2.1589
	-59.2819	58.5674	19.0311	26.8781	-7.7232	-24.1568
	-3.40457	13.575	2.79319	-6.28793	-48.7283	-48.0435
	-36.2986	14.9766	-38.218	-31.3971	10.1688	7.7431
	74.872	-15.0281	-18.9466	-12.9064	-35.3461	-39.6001
	-9.50475	6.24554	0.94719	-12.9901	-52.6377	-21.4334
	-73.7011	-63.158	20.8807	4.15802	-31.7564	0.393924
	-42.8923	12.486	-2.57037	-5.43484	-43.7268	-32.2597
	16.5604	12.7627	35.8543	1.1493	3.58047	-16.0447
	-26.0101	23.6623	-0.816569	22.887	23.6816	-1.14641
	-9.66106	19.8639	16.5371	19.9711	-74.5595	-3.39903
	-37.8848	-22.3277	28.626	39.0713	-33.458	3.16936
	-17.8121	14.6836	6.04025	13.5659	-51.2747	18.3237
	66.566	45.3653	9.6625	17.0873	8.55203	-6.63398
	-63.0677	72.4913	10.7056	4.73874	32.3851	3.78383
	-9.8692	-31.6114	8.29942	-6.00343	-1.47172	11.8981
	-44.6261	6.52765	0.178698	-24.2541	-17.4571	5.44608
	11.662	16.1797	10.7611	11.2036	36.3054	0.225368
	24.7927	-43.3238	9.18705	23.4845	-0.0933148	16.7386
	-14.9434	4.30947	11.8387	4.42531	20.9305	-4.42601
	-51.754	-32.317	-4.36251	-0.503492	19.1588	-3.45676
	30.1752	19.8972	-13.4587	-6.97012	-50.7312	-16.5078
	-0.328179	63.1162	1.66458	10.9767	12.4092	20.6053
	19.5872	31.5817	33.4087	17.7132	19.4285	1.41745
	3.70509	-20.0862	-24.5614	-5.69786	-45.6654	4.27955
	24.8782	-43.8617	-1.49612	12.5433	35.7141	3.83418
	68.3371	-22.9987	0.996888	13.7684	36.0796	15.9707
	4.6279	-61.5233	-14.7143	-2.25474	62.9172	19.6389
	-24.3499	11.6277	-22.1299	-29.1703	53.4324	17.5095
	-37.7794	24.1928	-10.6477	-10.9475	67.5221	19.9884
	33.7891	-53.7705	-35.3827	-40.9988	17.3419	-41.0062
	90.2104	40.3271	-20.5493	-38.7053	-34.3804	-31.4166
	-93.7459	-26.716	-30.532	-23.9922	-18.9625	-0.26036
	50.9679	6.37367	4.95759	-0.916781	-0.031895	0.780387
	113.2	-5.81341	32.8446	0.550282	28.991	-10.1894
	16.3653	-5.14395	10.9444	13.8203	18.6128	-5.42805
	-6.38725	6.75013	7.35164	1.33502	-34.3903	15.5358
	21.6796	52.8769	-24.0107	-13.8824	-47.1554	-8.08266
	30.2828	-85.981	-6.09713	2.40741	14.4798	-20.5708
	-19.4014	-18.5881	11.907	31.7782	-49.9943	-36.4707
	-67.4765	38.9773	25.407	0.573062	10.4809	-7.85704
	94.594	-51.3241	-25.9568	-19.2943	-77.091	-31.0059
	-8.26909	-30.0536	15.0485	40.6175	-42.5679	1.28787
	-72.8597	-34.3964	-8.34006	1.91665	-20.5265	-19.1423
	-41.6912	-47.9495	33.1274	38.886	7.03906	35.0687
	22.9101	44.78	-36.8819	-49.0135	29.6512	19.5032
	43.6303	-13.6831	13.4141	11.8638	-13.1954	24.3605
	-47.2446	61.9076	-17.6393	3.53196	45.8846	51.9053
	-61.4243	0.19559	-62.4271	-33.0347	14.3493	-11.8509
	-0.997209	5.7149	-16.0719	-27.9566	-66.0033	-26.814
	-29.2089	-12.8138	-17.8702	-13.0934	-115.101	-20.8926
	-13.5317	-17.0872	-27.4834	-39.0888	-98.9974	-41.3103
	-33.2812	-33.7027	-17.9337	-5.25957	12.7198	17.9636
	-24.8826	13.5695	15.7659	21.6514	40.5633	10.4288
	50.4488	-10.954	37.8153	20.3257	55.1479	31.4703
	-51.8689	-15.1908	8.02718	0.555393	25.6747	30.4965
	34.4528	-3.10937	0.141437	-15.36	-3.00104	12.6643
	-12.8636	13.7269	-21.0911	-8.32542	-9.09495	-10.0585
	1.53374	29.6628	-1.59363	12.0465	-48.5494	-0.0743258
	65.0208	83.8093	19.4281	36.4144	52.2191	46.1225
	23.9944	43.6363	25.9787	25.199	51.9819	21.4765
	-22.0796	-7.51403	1.31205	3.41387	-2.52782	21.8675
	-78.8665	15.1274	-7.24948	-7.98973	34.4801	10.8185
	3.80327	-66.5074	-24.2416	-22.0267	1.08947	-17.2973
	25.3006	47.7413	33.4028	6.67222	15.913	6.89394
	-5.11224	-11.4818	33.5187	25.4666	-20.0062	36.5502
	-35.256	48.5348	5.04419	12.1091	-46.5642	32.3836
	-33.5992	17.5635	4.0369	33.4732	19.8882	-2.63319
	54.4681	-7.08563	-11.244	-0.773135	26.3222	-13.5126
	6.14658	4.05521	22.3636	2.93735	-46.5647	-35.6844
	-15.7491	-59.3227	5.40119	-25.4813	-94.8619	-39.944
	-94.5955	-10.9948	5.55421	11.4061	-55.5215	-10.9673
	5.19106	45.8529	40.8602	36.7987	38.756	-11.3004
	-17.4835	50.9964	57.2388	48.3482	19.359	-3.39483
	82.4965	-2.55231	20.6158	-14.0584	-15.9847	29.7992
	29.1422	-40.4615	-27.9489	-52.277	40.8479	-1.18356
	1.75916	-19.8552	-2.86717	-4.71176	47.9861	0.601955
	47.2506	28.0764	-34.1627	-14.5451	43.0785	21.8866
	55.6812	10.3371	-30.614	7.3928	8.95187	51.8028
	-1.50321	-21.2776	-35.4045	-29.7237	-44.9784	-18.5446
	-22.8677	21.5782	-39.7701	-4.79256	54.9324	14.781
	-4.01878	21.9148	60.2495	48.7436	73.1589	11.6533
	22.4761	-36.7456	43.2719	36.2124	4.28102	-35.4122
	-43.7854	-35.0118	23.6482	5.24381	3.46539	-4.3195
	-87.5872	-50.125	-17.7413	-45.4564	-124.295	-47.1494
	45.826	30.6626	-27.9405	-18.0926	-46.205	-41.4838
	-19.0282	53.2749	3.93535	2.37599	76.0559	-20.6972
	40.5353	-38.8686	7.2089	8.09579	85.0532	-14.814
	-68.7437	1.8333	-11.5966	-48.941	-14.5801	0.15895
	-11.0729	-18.9698	-49.3424	-44.1027	-62.4437	-21.3026
	11.391	21.9348	1.59202	-15.0279	-74.0229	-22.4604
	0.950433	-74.6649	-5.98414	26.766	-17.7996	21.1084
	34.6482	-79.4752	17.965	-3.28405	-50.3441	-18.1175
	27.5152	20.3889	-21.9646	-21.0063	-15.2333	-48.4645
	63.4263	60.8291	1.74624	6.74538	22.833	27.3215
	-0.241555	-24.9657	11.0226	34.1739	24.5214	0.722844
	1.9524	35.9415	25.37	23.7016	47.6255	-5.09182
	-30.0184	-41.1797	14.3972	31.6617	36.4767	-11.1944
	38.1256	-15.7082	18.6798	-4.09174	-8.22214	25.2258
	-3.18032	-40.6913	5.40321	-33.2931	66.882	27.2449
	27.2941	-6.86058	-22.7502	-33.1394	-4.09879	-41.8438
	18.2542	40.673	-42.3936	-39.8344	-24.1759	-31.756
	-47.6958	-14.8838	-13.4786	-29.5983	-15.1642	-19.5817
	-50.9825	17.9259	5.43084	11.8311	9.87332	26.0178
	-60.1673	46.1389	11.1636	28.831	68.8353	21.9209
	-30.2462	-39.2306	19.0586	28.462	62.6378	9.5061
	40.3627	-35.4512	-60.9297	-37.0795	-35.3932	-4.47939
	32.4082	-33.3469	-11.4629	11.6108	-33.8955	26.8512
	40.3813	36.3764	3.28427	11.1222	29.8381	30.1707
	14.4784	-43.1866	-3.29629	-5.22653	22.8783	19.7662
	-7.16626	-5.65764	32.2987	33.5693	52.3405	27.272
	16.3808	50.1968	5.06984	17.4336	-36.3007	38.0133
	-49.0389	80.4155	9.62176	0.695675	11.9985	33.3097
	-99.0465	-64.7896	-15.7061	-9.20758	-36.2803	-20.9418
	43.9792	69.748	-27.2092	-17.9441	-69.4108	-21.5385
	54.1323	-24.5544	-30.8374	-14.2724	-91.1357	-12.6063
	8.62857	-23.8526	2.15155	9.86642	-18.3141	0.890896
	19.9196	-54.6583	29.2296	18.0219	43.8837	2.02924
	50.4611	28.2151	32.8134	18.3674	-8.22515	19.3083
	-8.38472	29.8102	1.7436	5.27671	-37.272	21.6064
	-17.8477	30.9763	6.45359	29.2428	52.756	10.701
	10.5699	-31.6449	-2.14449	-18.3934	-24.9604	16.4799
	-53.7192	31.6525	-9.08059	-22.0649	-47.5537	-12.6672
	-31.0457	31.2724	5.84588	6.18872	-54.6349	1.8661
	38.0656	8.93764	-0.181388	8.49479	13.4256	-37.3437
	-25.4276	5.82398	-25.187	-25.5838	-34.5174	13.0648
	-17.9561	44.7624	-25.734	-10.4941	-10.8727	-13.7583
	-14.9006	8.62358	16.5182	-0.639059	-3.31047	3.2327
	-13.5589	18.6725	3.5567	9.94033	18.9485	3.91752
	-4.52617	-11.0749	32.2645	27.8901	72.2593	19.0097
	31.5417	-53.0668	-7.53732	15.3047	9.35249	27.0433
	40.0702	23.2379	-14.6664	-7.36514	-0.299553	-25.7962
	44.0755	22.8717	-0.729106	3.37799	-42.3764	-42.5541
	-14.8332	22.1097	24.7835	18.0966	-77.5312	1.40234
	-35.3115	11.7416	13.2078	-15.2897	-11.5252	-26.6443
	21.092	57.9765	3.22201	-5.37801	96.8077	6.03909
	24.3238	-10.2051	10.7732	19.6592	134.809	19.4179
	61.2399	11.556	29.8517	0.423339	66.3137	30.5088
	-23.314	-31.4865	-29.9601	-12.7073	8.64353	-11.6712
	-77.3049	-31.4764	-47.1064	-24.1737	-5.84148	6.34554
	32.0783	37.3038	17.7451	12.7131	68.6077	25.4211
	-21.3102	-35.4968	40.8077	15.646	22.4371	-1.75067
	30.0915	24.165	9.63887	-3.17449	-7.01009	-26.2808
	19.1355	30.6888	-4.72754	-2.87957	11.0138	-5.55749
	12.9433	-11.4579	25.794	-2.9781	9.88069	-22.0168
	-28.0329	4.53345	-29.6939	-37.1249	-70.5495	-39.2071
	-17.8134	11.3137	0.313877	16.0288	-1.38004	-20.2436
	-16.944	17.5565	-6.33757	17.5891	36.6407	-10.4087
	-11.287	-27.1013	20.2071	24.6616	40.4263	40.1561
	30.1289	-8.73392	-10.929	-31.3958	-14.0681	5.0234

## Sheet: C4
	Fig 2A: Left LGN	Fig 2A: Right LGN	Fig 2B: Right V5	Fig 2B: Left V5	Fig 2A: Right V1	Fig 2A: Left V1
395 data points	37.6919	44.07	-16.8652	-1.61299	-60.4254	-21.2165
790	-39.191	-116.684	-10.3152	-7.68318	-6.9662	-19.7761
13.1667	90.8117	11.3983	7.78083	-18.3334	33.9624	4.59516
395 vols	-31.3417	94.759	36.264	-1.21742	7.08221	37.6861
	-58.4176	100.018	8.68141	-1.7782	56.0223	3.17637
	-29.3323	-83.5209	-20.1863	7.80915	41.0548	-1.05449
	-28.1042	-5.14826	-7.53679	20.3402	15.1017	2.42921
	17.3214	-13.3542	-16.0274	18.8	27.762	4.71325
	-58.3164	29.2968	-1.40103	50.396	-11.84	23.7123
	-3.93911	-37.9181	80.2068	-171.719	-71.9313	-9.98816
	47.4125	-54.4568	30.5402	94.7746	70.9953	6.34794
	-8.43081	-84.1687	-29.0162	11.2633	-36.2114	-46.6791
	-95.9224	-15.4525	-50.2029	-13.1635	-80.143	-69.9552
	-28.4172	-28.8787	-8.3968	0.727302	-96.1358	-56.27
	-15.2735	42.8009	-12.9334	-7.52642	21.3238	3.82753
	32.0521	38.0178	12.673	-16.8763	-29.6816	-36.4065
	-10.036	81.2738	-19.9497	-14.7855	10.7849	-31.4172
	12.5713	-82.7275	-13.9349	-17.0527	-9.50547	-64.8833
	-45.3926	2.12666	-27.317	-28.9406	-18.8963	6.39232
	26.2114	17.3378	-46.4767	-29.1459	-27.1861	9.83848
	-62.9736	-34.8761	-17.3135	-32.4765	3.20626	-16.7479
	36.3353	41.6193	-3.96158	-20.999	-10.2695	9.38811
	-56.9534	26.5375	16.5057	-2.16604	34.5222	13.4586
	26.4652	-51.9495	-8.03159	3.55826	-89.3134	-13.3168
	25.2404	46.7183	-21.8891	-16.5718	-12.1296	-15.0415
	-64.5822	7.12603	-39.9998	-12.937	15.153	53.2271
	49.05	-15.7306	14.7883	-7.06818	31.3491	-18.7744
	6.70635	29.5008	2.08368	25.9264	33.8571	34.9699
	-4.48828	-29.3345	5.96888	15.1896	-21.1865	10.843
	38.4967	-5.48287	-16.5621	0.130935	7.80182	-37.5679
	-68.2224	-27.0983	6.42103	-5.03161	1.46355	-43.9218
	45.3727	63.4307	18.5533	0.735637	2.45819	-27.7997
	62.7209	21.134	48.4353	20.6138	37.1849	73.7683
	8.99515	56.4478	51.8311	8.72613	58.5376	38.3798
	-12.1455	9.645	40.8788	0.00440293	-19.4364	28.5611
	0.198031	17.8991	30.8945	20.0842	43.0665	35.8149
	20.68	14.7706	-10.7178	-24.4781	-5.73161	24.8462
	-18.2417	-61.8249	-6.68078	-8.57331	-26.5633	25.6824
	23.8894	22.7767	-10.253	-6.85875	26.1238	-24.152
	32.2543	-31.3356	26.8511	20.0448	34.5517	48.8738
	40.6834	-12.7658	-4.23557	13.8294	60.8941	20.9498
	-22.9145	32.0802	1.29002	17.8062	41.7665	49.5406
	-4.85089	99.4018	14.6838	17.1935	-12.6774	-14.1318
	-15.9632	-130.715	24.7145	20.9175	-14.5098	-0.689069
	22.9935	-74.6827	-24.7042	-3.262	-32.0779	-37.3492
	34.3386	43.5833	-17.5171	3.97509	-49.7992	-43.9945
	-13.2092	21.7315	13.5502	-5.66221	5.0335	8.97645
	40.3953	-26.2512	0.467983	-16.6179	-60.0412	-51.7399
	7.19656	13.9712	-10.0553	-5.26544	2.51812	-1.88608
	-50.6973	-32.215	12.5312	9.63184	-31.91	-25.0239
	22.2853	56.0953	9.24061	14.277	-10.7721	1.254
	-38.7895	-35.3545	11.8925	16.2949	12.5846	37.3607
	-1.975	38.2148	-14.8991	14.4811	35.0923	-4.68617
	5.2466	-45.1215	28.2535	12.8534	44.4967	56.9954
	2.30582	29.4012	-19.3402	-4.45965	16.7712	16.691
	-53.2208	35.8106	-4.54475	-23.3011	0.321685	-42.0401
	-71.7646	-43.8979	-12.752	-17.7236	39.4607	-39.0839
	-30.4669	-34.2479	-1.22367	6.90856	-9.16489	-4.65558
	53.7325	-19.9509	17.7676	9.88586	41.4099	-17.3793
	-20.4264	10.4379	7.43773	-28.4763	-22.844	-25.171
	-9.05959	-41.0606	-11.7425	-7.20413	3.95104	-35.3149
	-58.3069	-58.4522	-12.1312	-5.65968	-45.9052	-35.4568
	-49.4376	85.5173	9.17557	1.86776	-8.81525	39.7224
	84.2172	-49.0129	-6.07097	11.4627	41.9501	56.411
	-85.0881	-42.3721	-25.5163	-9.99578	-42.6974	-16.206
	26.5474	-73.0769	-47.3638	-25.5745	-22.9472	-19.7228
	-71.189	-21.7949	-38.8719	-36.4373	-84.7915	-47.4598
	43.4393	-10.7273	-15.275	-24.0501	-41.797	-37.7942
	30.1482	-23.897	-4.59508	-12.7689	-35.4348	5.02678
	111.493	59.6015	12.3433	-2.86622	-0.416713	-11.6945
	86.1198	45.3911	-26.1291	-0.554735	-1.45232	29.1307
	-38.1692	9.72851	29.8225	26.2476	40.5901	37.0168
	30.7163	77.1182	22.0794	27.8615	25.5234	34.141
	18.2441	23.0383	26.3048	27.4751	14.3809	72.009
	-34.9074	88.0506	5.06132	8.79528	5.95306	17.4318
	-25.4454	0.495499	32.3004	36.6002	58.4972	67.5736
	112.451	-28.091	38.9805	-3.61254	14.1476	8.50592
	0.826088	-0.376111	11.0409	-3.52255	-3.43508	-28.3116
	2.04471	-33.8798	28.1879	5.69371	82.9562	31.0479
	-55.2098	49.8212	-4.47249	4.75279	-16.8609	8.47239
	-69.3199	47.2113	1.32148	-8.93055	-38.7624	-10.6758
	20.8417	-18.7057	-31.9603	-0.993187	-68.9266	-50.4253
	-64.7653	2.70632	27.3176	18.0387	-17.2806	-8.36043
	41.8579	-84.5479	22.6297	54.4062	45.6403	30.4387
	-26.0484	20.5102	-3.74853	10.8513	3.92572	23.6291
	-50.9226	-28.3381	-46.5167	-10.8388	-93.397	-58.5954
	-19.6497	25.8935	-12.9651	-38.0191	-28.62	-39.1909
	58.2514	-46.4308	-42.0914	-29.9272	17.818	-33.5047
	49.8898	31.5925	-7.88072	1.20903	3.76111	30.9122
	-6.31792	85.7689	-22.1647	9.96973	48.3829	3.30267
	-45.0122	-25.6153	-19.2264	-5.75458	-16.9007	6.5403
	-39.9518	29.3049	-46.5293	-16.7981	5.8664	-24.4638
	2.90402	0.842284	-7.87572	-17.1736	-47.0043	-9.37394
	23.3091	-41.4529	-45.3731	-6.39906	-1.60163	7.6719
	-6.71691	-84.3102	-22.2711	-12.4361	-54.6652	-100.332
	31.1479	93.0128	-12.632	-9.33266	-51.5981	23.9879
	42.4084	51.3106	-8.92931	-27.8382	-38.6629	-30.5475
	-37.6512	8.63657	-18.9034	-33.4588	14.5473	2.6025
	-34.6241	27.5381	12.563	-20.5016	2.81478	-28.7431
	-13.5681	21.8784	37.8589	-12.1557	7.12555	-35.8921
	-17.6647	11.9326	-18.587	-4.59011	-7.72869	32.8421
	40.7686	-69.5697	30.1114	35.9671	37.9645	64.2075
	-5.69191	-27.4679	38.633	28.2371	78.1315	5.18071
	-12.1363	-18.3667	15.9392	17.537	-7.15925	37.9552
	23.5368	0.597243	17.9754	-5.57322	-14.2187	-15.6533
	-13.1707	-26.1616	1.20848	-20.6544	19.8558	-17.0929
	13.2993	22.9047	14.6481	8.93337	2.98826	0.840817
	8.65295	-69.5267	-3.92404	19.9684	13.9413	-31.6753
	23.6677	-25.087	32.6825	31.1467	68.6724	39.3119
	-15.6238	27.8714	27.9213	28.9578	15.7998	-24.5083
	23.8141	31.2427	11.8102	3.41944	32.8598	3.18325
	46.2051	10.9492	43.9206	11.0779	70.4977	14.0903
	-12.2842	80.6145	22.0263	15.5522	-0.32802	73.3575
	2.10703	-55.0675	16.9626	-1.48907	-7.37503	32.5857
	-5.92995	-50.2007	-16.3676	17.6006	6.35354	56.158
	64.0525	-26.4085	1.81164	-14.4182	-2.05518	-5.79675
	23.4978	-19.6372	2.61075	-19.7725	13.2563	-45.078
	26.8249	43.994	-43.2386	-13.5633	23.5694	-19.2776
	39.376	-23.318	-26.5973	-19.5074	-37.797	1.26831
	74.9964	-32.6581	-8.36425	1.94608	-30.1176	-16.8444
	-39.6922	-7.41728	56.4256	44.8843	11.3945	8.51737
	-0.0943384	40.5157	31.6184	46.3814	-2.32272	47.1411
	-84.2621	-29.968	18.9899	2.10322	-64.1689	-40.0918
	4.38635	-0.919267	-16.2702	-11.9444	13.1966	11.2372
	12.4469	71.8663	-35.2797	-9.46635	21.0967	14.0559
	-62.401	-89.3511	-27.4713	-11.6811	12.5976	12.8906
	79.971	18.1872	-36.3405	-14.1105	34.8028	-27.7177
	12.2176	-3.6782	-37.7367	-33.8331	9.38494	-13.202
	22.2083	20.7927	-39.5637	-28.2978	-35.2313	-71.624
	-39.3798	9.44562	-64.0235	-24.368	-34.4349	-39.3316
	-30.7783	39.5267	-12.0589	-17.8201	-60.8009	11.8973
	-50.5363	-40.2644	-12.4054	-22.883	-41.8457	7.87898
	-22.6189	-18.5691	21.235	-0.216425	-29.2874	-46.5417
	-20.9781	1.20855	35.377	34.7482	-0.0467985	-6.90548
	-32.3322	9.06054	3.36023	9.40723	-21.7875	-17.9392
	-50.0888	1.5382	11.5552	1.71152	-24.501	-26.5076
	-60.3147	21.8138	21.622	-1.8612	-14.8833	30.6415
	36.9943	-32.7748	2.97426	10.0062	52.9189	40.7406
	11.2396	83.4824	11.4332	11.0944	37.1086	42.4341
	-11.49	-39.0132	28.2908	4.6227	54.4225	55.0114
	23.2792	102.626	14.5277	-5.24756	51.0842	24.7939
	40.4732	-0.430236	22.9321	14.9902	56.3076	41.7275
	-27.4398	23.0667	28.2382	19.5373	111.799	81.5238
	-6.82692	31.9148	-9.41635	5.16404	77.736	29.9517
	-0.8299	-28.8112	-21.519	-5.16446	-38.3303	0.641378
	13.4379	0.118055	-15.6622	-21.4224	-67.1014	-24.2631
	-26.554	-76.7251	-6.92664	-31.9451	-39.557	-58.4584
	56.8379	-117.302	3.36624	-11.9548	-21.1295	-10.7239
	-78.6109	-45.584	-29.7124	-7.6043	-56.3695	-57.7448
	17.7935	44.981	18.7767	19.9031	-35.1382	34.3189
	28.7991	33.8497	12.6826	20.3496	22.6934	-54.2666
	59.8697	6.79785	15.5503	8.59041	-50.6347	-38.0107
	-21.3872	-58.7201	-0.782671	4.60148	-40.8666	-48.4975
	90.3866	-10.6925	12.5901	36.5994	24.2212	34.1087
	-53.5014	44.0185	-5.36937	-5.8764	16.6526	16.13
	27.3276	-40.0468	-7.22855	7.03338	35.3261	18.0596
	89.0938	-35.8078	-24.1552	13.975	4.67591	-35.4728
	-43.6893	-44.1504	27.3814	-2.01528	-2.66333	-10.879
	30.6435	121.449	56.6986	23.3035	-8.89329	-1.8724
	30.6859	2.46549	-93.8833	74.8169	62.0656	14.2995
	-111.305	-118.776	-324.79	-319.328	-64.8516	-28.9501
	53.745	244.657	196.836	152.95	0.71885	35.4481
	19.2207	32.132	79.073	53.9751	-17.8657	4.27877
	43.8387	26.5759	35.5683	30.5005	-6.46603	-3.02451
	-11.9264	10.9755	55.7078	29.3558	61.2949	19.8436
	-23.6044	28.6422	59.4868	40.6942	0.678729	16.8508
	-11.9071	-124.048	38.434	10.0965	80.2252	43.9584
	-13.4254	-13.3526	-61.5135	-158.997	-161.814	-134.691
	-74.4224	-42.6268	36.48	110.079	68.5431	82.4932
	40.1654	-16.2436	6.50321	44.211	104.096	135.688
	19.8324	11.4121	31.3622	-3.91749	21.8909	45.7417
	43.9179	2.71674	4.34878	-10.0903	-19.7172	2.31083
	-50.2778	-33.7256	14.7723	-17.1084	30.0626	9.98072
	1.66934	21.2838	-5.99978	-10.5062	72.1847	11.0409
	-54.2376	-25.746	-35.0299	-22.9616	8.04436	-49.9613
	-83.3509	-58.9791	-74.4078	-72.8039	-156.638	-132.432
	-88.082	-67.5242	-64.3632	-62.3313	-156.853	-123.993
	-14.1643	-20.1158	-48.1532	-57.727	-89.471	-70.5922
	5.69224	-17.6155	-0.916923	-13.0975	-19.896	4.682
	40.3816	-17.1154	22.3312	-5.3652	23.6403	19.3801
	-18.4746	-223.515	13.737	21.658	-20.7119	-47.9073
	-25.4311	143.137	-43.3486	-17.6279	12.6271	41.2401
	5.88815	93.8939	-33.5192	-3.79686	-42.8697	4.28616
	48.9952	90.9731	11.2855	8.5838	-5.3695	29.1848
	39.5778	14.0644	15.0402	3.93829	49.8491	46.5072
	31.3101	26.8402	-20.8125	-14.6095	11.4682	34.5579
	37.1571	25.5013	-9.83655	-6.52483	8.19201	-1.90267
	2.48495	29.5847	21.437	18.2484	0.678119	51.9135
	-62.0344	71.7427	44.9909	35.749	55.671	62.6124
	17.336	-51.9448	4.63394	-9.65523	-30.0597	5.7159
	-77.9003	27.0095	-36.3706	-5.50893	-17.1605	11.367
	-24.4311	50.7508	-7.36148	-8.13386	35.2685	2.0264
	-1.95103	97.6736	-11.4626	11.9294	27.4128	28.2995
	33.5374	-147.757	11.3471	5.4269	-44.9988	-50.0502
	-11.2377	-52.4326	13.5643	18.2448	-7.41055	-14.2497
	45.0507	2.84527	21.3673	20.5655	3.78373	-22.589
	17.185	-9.57452	28.9737	-0.516374	-1.37987	-16.3436
	21.3515	-21.1837	-5.55136	-0.390017	19.1105	7.80148
	11.3796	8.2484	6.93957	0.47124	-13.934	-7.23844
	-7.3779	8.48089	-53.7292	-1.97073	18.8597	-55.6319
	83.1164	-61.3599	-20.7661	6.21014	-67.114	-59.9147
	-29.7438	-0.370224	-15.3111	10.1462	-8.42897	-17.2525
	-99.7803	-72.5298	14.8392	21.5115	-18.7042	-46.0491
	-49.8095	3.98493	-23.9454	27.8982	-22.5479	-50.1721
	26.7291	38.1819	-0.425579	17.745	-44.2268	-12.4431
	75.3292	46.4716	-16.9425	17.0546	-21.883	24.6974
	51.0672	-0.632127	-3.45083	13.7545	19.8485	25.5261
	-13.5164	-0.329266	-12.9867	12.9606	66.6222	49.9093
	-79.7212	37.4765	57.2026	24.0663	113.252	55.2686
	36.2059	50.803	31.6648	5.35367	51.6342	37.7544
	42.4747	13.9988	24.7654	-25.1729	-26.5407	-4.02396
	-8.57786	-2.81638	-4.48499	-47.6758	-65.1121	-69.18
	-17.6788	-39.0454	2.72628	-18.2053	-8.36964	-61.3933
	17.2267	20.8901	9.52206	4.24185	15.8775	27.6217
	-4.598	34.0134	16.6729	15.2254	62.7677	52.7517
	-27.5432	121.43	65.7752	63.339	100.534	99.468
	9.9622	54.3989	28.234	18.8613	53.5955	81.8069
	53.1571	-19.6583	13.4192	-12.4621	83.9816	57.7479
	37.5426	-11.258	27.1157	18.7616	20.8028	30.421
	72.068	-94.231	25.2466	20.9309	58.6078	62.6166
	-48.0668	-23.5664	10.7495	-2.64214	3.05632	50.7163
	5.26208	-87.8028	-39.1195	-10.938	-35.3212	42.1649
	-27.7393	-10.3787	-44.8297	-25.9168	-56.7012	-15.4187
	29.7844	-29.185	-54.6733	-16.8995	-106.905	-37.3116
	4.68626	-35.1451	-24.2895	-5.14075	-19.9749	-33.1884
	1.22065	-38.9577	21.2257	11.1913	17.8377	-4.74744
	-37.1285	35.3858	-23.2325	37.7493	-43.3257	46.6851
	52.6081	-152.681	-395.702	-38.1235	-79.9017	22.3165
	6.52452	33.6341	285.086	-6.62156	-25.3321	-37.5858
	-38.4688	25.8539	18.9571	-34.7629	-24.7226	-13.7246
	8.18033	111.569	79.7882	-34.0432	17.8856	-8.83497
	46.2975	42.5502	127.152	-10.7598	-3.85413	45.6909
	-22.9998	55.7174	-339.456	-197.267	71.312	-118.534
	-4.69237	57.7803	35.4695	-1.51846	-158.932	-86.1043
	-72.5063	70.4836	8.41754	69.6603	81.0696	114.848
	48.6543	37.8983	20.8021	39.3649	100.541	61.2683
	-3.82128	-12.8809	15.3467	6.52624	-76.0734	-151.376
	-33.1329	-21.391	23.9229	-1.13737	-59.8011	-64.6503
	-48.674	-94.1746	29.3627	8.63735	23.4348	-11.0787
	-30.972	9.82175	39.4729	21.6088	21.8148	2.98886
	-57.5098	-44.7409	-17.0904	-6.12733	-16.5563	2.82237
	25.2372	28.3492	-49.9128	-14.5877	-99.3763	-65.5342
	-79.3303	-87.5399	16.2113	1.22361	-136.315	-114.337
	-37.4772	-65.9393	-38.5722	-7.42505	-113.899	-129.74
	84.2995	-56.3051	25.2684	58.8613	91.3083	22.6846
	-1.86137	51.673	25.6869	43.2345	78.4443	56.2671
	29.541	39.708	7.97929	-1.8912	39.1068	27.6606
	-32.8276	-102.298	21.1119	-24.4851	-22.9767	-9.61114
	7.19489	-79.6681	-27.7661	-19.5543	-27.7023	-46.5539
	48.2868	-6.56013	-10.393	7.92623	67.6166	44.2992
	22.9428	2.76149	13.5759	-3.32611	39.4701	72.8398
	24.1893	39.5539	38.1033	32.5588	41.4197	65.483
	21.8376	14.5387	55.8469	33.232	65.9716	72.288
	-7.90003	47.5165	32.7262	36.3724	37.7617	12.6406
	50.5516	-15.6038	21.8134	10.9719	29.4116	21.338
	34.7297	-1.95301	17.8417	-27.1404	-6.49095	-43.7005
	-25.5108	-35.862	-17.5443	-45.0791	-6.92415	-23.1875
	12.8668	-40.0277	46.8004	4.6391	-17.7897	41.0754
	81.07	-15.4047	-41.3838	5.89713	139.365	114.443
	-77.9015	-90.9197	4.35054	-19.6084	-12.1256	-31.8176
	58.4619	17.1691	11.65	-19.457	-21.257	7.87622
	-27.0911	12.3604	22.7995	10.6134	55.9927	101.162
	39.6352	62.5339	42.482	38.6608	66.4031	107.964
	-74.0605	29.3807	26.8271	28.9349	74.4573	119.11
	47.2247	67.7245	-15.8475	18.237	22.9617	69.9825
	38.5101	-38.8399	8.53537	-16.4581	-3.41977	36.2678
	110.435	-48.8919	53.9152	9.31662	68.9312	125.371
	-32.1591	-48.5247	-67.3079	-22.4367	139.489	83.8257
	-172.248	-144.61	-466.463	-68.5904	-735.579	-625.889
	-26.649	-20.5788	56.2719	-18.2077	22.2867	-46.0173
	-59.7432	37.8762	30.0239	-6.0323	13.6628	-4.38131
	3.6034	90.0151	43.2389	-17.9654	12.3224	-70.5923
	-11.4111	81.5961	12.0389	-0.425395	48.5631	-10.6673
	56.6039	133.684	40.841	-9.77338	-18.3035	-73.2127
	-0.0858072	-19.2954	15.2428	-8.69365	-28.7453	-22.6907
	13.0775	62.8756	-14.2377	38.1867	47.2245	13.4171
	-53.5024	117.177	40.5435	9.90066	19.9477	-15.3418
	37.3228	31.0201	19.6894	-7.45315	-10.5299	-30.49
	-120.105	-20.1136	-42.6762	-43.405	-76.2377	-49.895
	36.2964	-5.43695	10.2844	-36.2101	-13.0515	-56.3515
	22.513	6.87066	-19.4164	-17.4265	11.3468	-22.9148
	56.7712	-23.7012	12.3858	-13.7032	46.9941	43.4426
	-3.20197	66.8468	45.8482	25.3343	68.1916	42.4969
	-38.1122	28.6354	35.4967	-9.52531	2.11143	45.0921
	-47.6164	-41.4518	-11.4117	-2.57748	-7.5085	-14.579
	-17.8201	31.7434	2.87535	6.92513	-36.3042	-100.608
	-13.5759	-36.9632	-5.12615	-3.62687	-164.535	-146.805
	-34.1741	-127.658	-3.65491	57.2323	46.8231	93.0961
	4.19463	8.35602	23.6044	74.2379	3.83083	31.1735
	53.6201	20.8686	7.4894	28.3082	20.747	69.1334
	-11.5437	-60.3922	-38.0648	-16.1613	27.0418	12.0019
	78.8315	-54.3577	-10.5266	-13.7652	26.6305	8.53996
	-58.6384	-16.3742	-19.5944	0.852158	69.0147	23.7714
	17.3876	-21.8715	-0.783657	-3.39426	4.96584	42.208
	32.1909	-2.88461	-11.3523	-11.2441	30.4125	-27.5131
	7.46721	88.8057	-0.74358	-13.8745	-6.51012	59.6622
	5.18738	9.97765	14.7262	13.0901	34.8996	17.3552
	68.9522	-18.741	6.05868	15.4337	-5.49858	23.402
	27.1184	56.8566	0.241648	5.96602	25.38	16.1481
	-23.7164	-45.4216	-25.448	-19.0843	-27.6682	-1.01021
	-37.2921	-55.337	-28.9365	-29.57	-28.164	-33.6151
	-92.4323	4.15997	-49.7765	-42.0827	-37.1349	-43.0044
	-32.4221	-152.199	12.7603	-5.14397	-6.51313	-45.6798
	122.157	73.2724	95.234	53.014	6.79086	81.2532
	-33.1775	5.36266	-0.191794	14.1841	32.8006	21.6411
	-51.1369	31.5878	3.60962	-4.03233	5.86249	13.6731
	-45.3601	61.516	7.27099	10.3649	31.8431	35.3504
	104.911	-13.314	28.3261	40.3363	107.062	62.9746
	34.0599	52.3087	-4.17186	22.0999	16.8226	30.946
	-43.2865	-39.64	-0.24423	6.31797	10.052	47.675
	-21.9563	-58.9008	-13.2718	-30.9969	-51.4961	-7.3576
	-7.58195	-13.4252	-29.2604	-13.6804	-24.8081	-31.1184
	89.1196	29.4674	45.1166	26.3659	84.0095	32.308
	2.72714	47.1623	43.8792	23.2308	-27.7422	35.6312
	14.6258	-42.7915	13.4202	-9.54045	-34.5296	-10.3643
	-12.2952	-69.5009	-46.1632	-29.6399	-71.6527	-94.2231
	-72.4878	-5.95974	5.79156	0.329322	-27.7555	-38.0206
	8.26104	97.7912	-4.00371	7.38061	12.9894	9.23904
	14.6383	-111.23	2.97924	15.9252	56.6697	72.981
	21.9254	32.3002	-1.20841	-10.8993	-11.4597	25.7896
	58.2981	1.82851	-3.71191	3.07062	37.2448	48.4078
	-73.7554	-72.5612	-53.1795	-10.6137	8.25881	12.2107
	56.1444	-89.3446	23.3965	33.6384	28.2468	47.7085
	-13.9594	101.888	-36.5626	-73.4652	-163.891	-133.933
	-72.7245	38.158	-36.2192	-14.5535	-25.6579	-101.747
	-94.5153	53.2059	-10.8965	-41.7359	-51.8826	1.03147
	40.7799	108.681	1.02729	-4.24747	79.4007	63.2051
	-1.89506	111.87	15.1621	-15.4819	4.78795	-35.4361
	-62.4722	24.673	10.7249	-37.061	13.5874	4.72147
	75.6585	-40.4253	-14.2297	-11.1184	-33.6371	-38.3944
	-9.82162	41.3388	1.42579	-33.6421	-178.398	-140.095
	-46.2706	16.5778	-8.58247	28.7588	35.9383	14.0998
	44.2029	-0.111061	17.4293	31.2445	78.2884	63.2742
	48.4775	53.8097	-9.13545	32.0278	18.1879	-25.7886
	10.6478	-13.6936	22.1536	35.7234	7.20603	26.6277
	-57.2222	11.6701	15.0857	10.6262	41.2868	6.94609
	-73.2065	-86.3021	24.2185	15.7465	-8.75792	8.00367
	44.8703	9.56126	17.4153	15.629	-14.7965	13.7515
	42.0525	-93.2051	-3.0965	8.91947	54.7478	-6.11077
	9.66125	-30.2253	-1.25563	-14.3501	20.5248	17.3566
	-20.6247	-19.4282	-8.06233	-16.4006	31.9664	0.979305
	20.3952	-28.1181	13.5855	-8.09918	56.037	16.1567
	91.2183	43.4515	14.8631	3.82874	72.6829	75.3886
	-86.7314	9.05714	-26.9679	-11.3075	-31.3806	-34.4337
	-23.0482	-113.247	-52.8146	-26.6805	-72.8743	-91.5983
	-111.002	-56.4896	-81.6399	-53.7257	-139.597	-76.8846
	-68.1312	-75.5401	-52.646	-29.6152	-104.037	-73.3104
	65.4179	131.879	77.7352	15.0467	-12.6966	1.34681
	71.9964	84.348	68.7497	64.3125	93.3896	104.45
	65.0718	25.6955	51.4745	78.6167	92.3207	98.9103
	-19.0177	44.293	41.1084	34.4567	-5.30747	48.1968
	44.4575	-46.6609	60.0437	38.305	36.3541	51.2586
	13.5114	0.886848	-18.4743	33.3837	-21.2055	-22.1334
	7.47131	26.3333	-63.7514	-32.7049	-231.969	-221.685
	2.89298	-19.6425	60.5102	19.6242	10.6991	64.5298
	-20.3371	18.5325	15.0656	10.9995	81.7815	38.5806
	12.6938	10.1701	-8.96288	-8.37863	45.6139	-3.23825
	72.0693	-39.3952	-10.0321	-9.93444	-21.2027	-1.74586
	-40.5133	-33.1258	20.5203	-10.0875	34.1949	-15.585
	-36.6265	4.24633	-10.8338	7.37078	10.7903	16.0734
	27.3462	-15.8718	-21.2357	-7.44323	-23.0402	-73.2313
	-1.52701	9.65304	4.45292	-13.8216	65.038	5.21515
	112.572	-1.21912	-26.9256	-7.42351	27.1952	21.2262
	10.2148	56.1758	20.3851	1.10726	24.9637	25.4173
	-30.6572	-45.5788	-29.7172	-15.4366	27.7173	12.3018
	-84.0794	46.4287	-14.8519	-22.0485	31.763	9.98397
	61.3222	-38.5018	-25.8073	-37.7351	6.9615	-9.38539
	-50.0994	-33.8672	-13.1421	-44.0603	-22.241	-36.6674
	41.8683	-19.9003	-5.22263	-10.9293	8.85009	-21.1952
	-74.6766	-53.5351	-7.69225	-11.1484	-26.4855	-33.1935
	51.1751	48.6834	-17.3254	18.387	50.8965	14.0534
	20.201	-24.2662	24.0554	15.4346	40.7912	18.0651
	44.9588	20.2535	-11.0819	36.3891	6.26119	0.427413
	50.6048	-0.697694	0.358448	23.3803	-34.2408	-43.7038
	-10.6678	-76.6006	-9.30175	4.1267	-61.5462	-34.6516
	-1.58159	-49.2624	13.5735	10.0575	-13.23	28.0817
	-108.176	-153.304	-41.6661	-72.1693	-256.473	-382.84
	-27.5297	84.7085	28.9486	-9.44437	-59.7699	73.2871
	55.6403	2.78195	39.061	65.4314	84.765	76.7457
	17.6526	-58.2735	44.0252	56.5542	67.9611	158.068
	-33.4994	88.4764	27.8536	30.7028	113.148	65.7719
	-27.1891	41.4842	18.3951	18.7268	-10.2604	35.6613
	30.6593	89.5483	-10.6954	-6.77931	-0.103287	41.7321
	12.2234	25.5578	-45.5648	-17.159	40.453	68.2287
	79.1725	4.08169	5.90458	16.922	2.46601	46.283
	-77.2535	71.952	-4.76307	5.25285	41.8308	16.9958
	18.8687	10.2444	4.17278	13.3629	48.4611	39.3171
	15.6316	70.5383	25.2347	-2.96798	7.78869	38.5053
	-6.42611	-2.89942	24.3002	-38.0057	-26.5141	-5.89232
	-20.7871	-6.20891	-1.22664	-17.1431	-3.43875	-26.3554
	-65.7843	83.2518	13.8432	8.00311	27.5223	7.78072
	-50.706	132.126	21.3767	33.4483	43.0305	-7.90555
	80.8394	170.625	43.1115	3.80238	-58.3954	-34.9447
	61.4914	-413.199	55.5522	-13.3175	18.406	127.699
	-28.8416	67.446	-136.017	6.31179	-11.041	-117.022

## Sheet: C5
	Fig 2A: Left LGN	Fig 2A: Right LGN	Fig 2B: Right V5	Fig 2B: Left V5	Fig 2A: Right V1	Fig 2A: Left V1
395 data points	70.7673	45.3476	-4.48717	-17.9165	21.6804	-59.9757
790	-8.97286	-10.9445	-12.2288	3.53335	-5.82218	22.7493
13.1667	-29.6637	-13.3936	19.305	6.35557	14.0754	68.9877
395 vols	-9.94164	13.6328	-22.1993	4.7299	12.7327	-41.6929
	20.0046	15.9404	-38.6923	-23.9714	-40.2279	-16.7954
	-33.5978	-67.8421	46.9775	9.16324	-24.5732	-37.3148
	2.40335	2.72404	17.5951	21.598	7.02158	-15.951
	-17.2254	-25.8788	21.3897	26.8437	33.1669	43.3214
	-53.3912	-38.1792	18.6621	-12.9613	42.878	60.5137
	5.11741	88.5553	-14.6287	6.54563	28.8074	-0.820324
	51.6176	0.130565	-54.5049	-37.534	-41.1027	-21.6433
	-29.2673	14.854	-6.79026	-39.9705	-4.17212	-29.9557
	2.53372	14.9308	-18.9873	11.3752	20.3964	16.5006
	29.4792	-46.7277	15.0077	-3.31096	30.239	23.0876
	64.341	-26.9467	9.59128	-13.6095	13.5987	-38.9387
	-16.081	24.3189	-10.3712	-8.72751	-24.0125	-68.2834
	49.6235	5.23785	-30.5404	-12.9559	-52.8227	-72.0419
	7.01003	-4.48395	-10.5972	0.803808	-32.7497	-30.6234
	-29.5027	-71.5726	22.0373	18.8484	-2.1711	41.2739
	-11.9466	3.91344	99.9795	22.1713	47.5376	32.1314
	-4.27963	-1.27332	58.7223	47.3162	93.2474	59.5218
	39.286	-72.6234	14.1085	25.8334	53.6826	67.7785
	-10.8124	93.7163	-68.6146	-9.50375	-21.564	8.33366
	-75.0075	-12.3053	-21.4478	7.53465	-22.7517	-11.387
	-30.4721	49.2402	-23.3501	1.50698	-33.149	-7.79754
	-8.35805	-66.561	7.01279	1.27466	30.9306	-3.39458
	39.1897	-17.5761	27.9609	-18.4948	-6.79652	-2.06512
	27.3467	73.1174	-56.7947	11.4404	-76.4801	-66.6412
	67.4481	-45.6388	-59.3598	-9.91555	-13.6427	-0.467507
	-23.8904	24.7105	-0.491617	-6.98242	-50.261	-1.37525
	8.60376	12.3423	-35.347	-19.2981	-6.10711	-67.5698
	12.8971	-32.9275	-51.226	-19.5292	-82.4832	-63.8058
	3.30525	31.1904	2.31468	-4.59622	-18.1157	38.8651
	-77.8806	19.339	46.1112	15.7438	3.16774	62.6389
	-57.0064	-33.2195	-18.9024	5.63017	11.3264	25.1278
	-65.2358	-24.1807	-36.7505	-19.6643	-59.5689	23.909
	18.3325	-64.5672	-7.55808	-5.37168	-22.1236	13.6995
	36.3971	48.6351	-5.48937	-14.7862	44.2287	43.3438
	-20.8885	12.2648	51.5499	-25.9043	90.9336	120.459
	2.44265	74.9546	40.9627	15.889	138.793	94.6267
	-27.1604	-20.6264	11.0366	14.5092	89.8942	94.9908
	-36.4725	13.3686	6.12007	-29.1367	7.41953	45.7492
	73.6547	-50.8901	-5.59538	9.91048	-15.5229	37.6094
	58.3594	-9.57426	-29.8392	-29.3522	-64.5139	-37.7881
	-41.0263	-74.166	12.3517	-14.4713	-26.495	-73.2907
	-46.6299	10.1504	21.2475	13.2162	-89.6488	-60.4714
	-1.51619	-15.1182	22.7859	3.1944	-14.3155	-26.4472
	53.0201	-14.4503	72.1591	23.6567	37.3274	40.8135
	96.0294	-95.9856	39.7541	36.2689	97.1722	84.8537
	-27.2509	18.3956	-38.4938	4.85028	82.4039	57.4668
	-37.7205	65.5047	-13.6566	-21.1773	50.4225	-3.70058
	124.386	-90.1605	-43.5936	-36.3431	-39.5859	-42.1496
	8.92507	41.0072	-47.2234	-2.77419	-25.8523	-43.6091
	19.7351	62.8475	16.9715	34.946	11.539	-11.2082
	82.647	46.6625	15.9602	-10.4903	58.4123	0.604834
	22.4452	26.0912	0.466286	17.0974	51.9863	9.53812
	-25.3024	14.6716	-1.57656	23.2818	3.82294	-13.3475
	86.4853	69.7108	-61.3913	8.36368	-25.179	-25.8327
	-81.1634	-42.7574	-2.62534	-22.5503	-19.5879	-74.1274
	92.5222	92.8322	6.19702	-5.32713	-45.0792	-32.0988
	22.6874	-63.7622	-8.38563	-13.2078	-17.8907	-13.1299
	-33.7265	-102.531	39.3139	-23.314	30.6341	4.83489
	19.9447	-0.905459	29.9331	11.0269	39.8954	61.3826
	10.2617	-53.5745	-19.7975	-8.24957	-27.3566	-38.1298
	-50.0758	47.283	-1.55854	-18.5462	-11.3829	-16.3203
	-10.4626	79.2119	6.04416	-9.70369	3.85587	-35.4752
	4.21052	-11.4196	0.256608	7.89714	-44.4892	5.79653
	-80.1969	14.0997	2.78738	10.4701	-53.4216	3.64268
	-50.2396	0.141307	-8.26462	15.5491	-11.0246	-22.5045
	16.4944	65.1898	-35.8176	3.61287	-14.4677	10.6245
	-87.4015	-18.2264	-5.00831	-5.40028	-39.1184	-21.7425
	-31.8278	-11.0863	-25.1746	-8.06047	-36.8133	-20.3726
	23.6637	-68.7919	-67.2397	-27.1488	-60.6513	-58.1834
	13.1739	-35.5243	2.81935	-19.6068	5.8721	-14.0339
	34.9726	45.9562	-11.7595	-6.09947	7.71429	2.82806
	-4.85706	1.28	-15.7522	13.4662	-6.24386	-2.46875
	0.366321	49.0727	8.45795	12.6839	-10.2852	-78.8139
	-60.353	0.982127	5.67482	17.4617	-30.2959	5.42725
	-29.617	-24.5895	5.88448	-1.92932	-26.0137	-46.9695
	-38.8074	-47.5339	28.7587	12.0638	-15.2149	-33.2777
	40.3916	38.0738	8.24856	21.3103	-9.13721	35.6446
	-84.888	42.8	18.467	16.8132	3.55239	14.9422
	-18.9612	-29.7023	-26.5421	6.62824	-18.867	-37.7326
	16.6302	-11.2178	2.57605	8.73126	-50.3929	-42.1593
	62.5312	-52.7513	25.3131	12.3534	20.9331	-10.3296
	166.144	89.5515	25.097	39.3363	72.7859	87.489
	28.8135	63.4269	67.3543	24.5703	104.415	78.0111
	-88.0227	-15.5581	26.4143	-28.5945	30.8745	68.2715
	-2.46499	-10.1898	-54.2208	-34.2486	-54.3215	-109.666
	-107.67	14.9335	-49.6182	-38.2959	-68.938	-44.1273
	-3.07448	-35.5256	-29.3333	-21.7041	-83.9196	-65.2813
	-8.27226	-25.0413	1.71097	13.3875	-5.44188	23.3383
	29.3451	14.8742	-16.1202	-0.87402	-49.3605	-1.92925
	31.566	-17.0489	-3.92914	9.91411	-17.4254	-87.3565
	24.2913	-10.0331	25.1417	-3.13472	-8.62973	45.4795
	-35.7397	-1.71539	7.02027	15.2964	64.4729	46.8787
	7.58326	-34.3829	-29.6941	-6.11526	44.9214	21.635
	-72.295	6.37732	18.1309	-14.8663	-3.50217	-21.9188
	-18.4335	-21.0343	-0.653312	-10.0917	7.86619	24.1936
	12.1039	12.6677	-15.2597	1.8782	-21.0018	-37.1418
	14.2717	2.26153	7.0501	33.2032	-5.5829	-28.9825
	56.4582	56.3112	8.17895	-3.35216	54.4879	49.8137
	72.6411	32.3891	-16.3932	12.9521	18.5942	-10.0834
	2.80777	-37.7028	1.20766	-3.33085	46.4798	27.8789
	10.4906	29.5818	26.9232	22.3743	78.0291	85.8397
	-3.28272	-8.56835	20.7629	10.1092	42.7189	53.9554
	75.2211	53.1514	-16.5009	-9.19576	13.3418	-44.2857
	-49.9126	-121.734	8.56366	-20.3992	3.17156	1.23041
	-1.52523	5.99208	29.7468	7.96756	35.6182	-16.947
	43.518	61.239	50.5774	-18.5017	34.6759	57.0808
	0.0317989	-31.2428	64.4733	47.9776	59.0461	125.974
	-13.0513	93.2815	29.0306	17.5169	42.9041	11.7446
	-11.1479	-71.5751	12.6207	14.6989	16.5201	-9.31592
	-49.8649	-36.2345	-70.4439	-23.5309	-44.9305	-90.2125
	-14.6515	95.7346	-79.7914	-10.6208	-92.9656	-120.2
	-18.5972	-29.6185	53.0537	4.96166	45.8329	48.2211
	25.676	-10.6447	51.2825	1.49129	60.2148	9.39627
	-3.02845	-0.652665	7.22042	-0.68011	8.69372	-0.950729
	-40.3652	-43.9115	-1.91463	-20.992	5.36393	0.799238
	66.3012	69.2659	-39.4094	-9.05814	-26.5625	-20.2471
	-51.7764	-52.9421	18.688	-11.8348	-21.8989	-11.388
	46.8929	56.1815	5.0032	5.25207	3.00929	-2.14483
	34.5473	27.6514	-65.3134	-25.2783	-52.4799	-14.5585
	-71.984	13.3123	-4.99171	-1.8854	-92.5523	-102.949
	-102.553	5.57241	14.3983	50.8345	-40.1268	62.9522
	-3.93947	53.1853	34.7511	65.5103	-35.9429	-11.4059
	29.8557	-111.309	-77.2536	-12.125	-66.1123	-45.2486
	-1.97839	1.94163	-4.13473	1.67503	-11.3204	14.4495
	74.4194	-81.7238	59.8621	27.6905	2.75751	88.1092
	-2.92051	-35.1841	-47.1714	-42.5401	14.4304	-51.0705
	-28.2512	-102.373	-30.7006	-46.9357	-33.4733	-56.3858
	35.0634	-8.76619	-41.6457	-35.3352	-58.3044	-72.9473
	88.7654	38.5419	19.2926	-7.21915	20.6247	11.7071
	-50.5444	84.3085	39.7148	16.0455	28.0857	81.2612
	36.0059	84.5487	-9.6767	23.154	53.3947	47.8118
	32.5835	38.3272	-60.0662	-19.9939	-34.9113	32.7864
	-87.2111	-68.1296	-15.2925	3.6699	-39.4677	-66.5284
	-25.9404	38.1282	17.3002	-10.2233	-16.1873	56.7043
	25.8683	20.2113	17.2741	14.6234	81.6022	57.4082
	5.44716	42.8529	-4.96171	-2.46709	24.6527	10.5157
	-31.7055	-13.0239	19.3092	-21.227	47.0751	28.0236
	-17.3262	41.6318	-45.9342	-37.4372	-32.8986	22.269
	31.8522	-73.5751	-27.7092	-10.6294	-50.4754	-104.269
	-15.7955	-23.3492	-0.098446	5.78052	18.6524	16.5947
	59.8406	-71.0417	4.51158	14.1529	-21.7335	-17.4702
	-63.6763	-34.116	39.1336	31.7644	-19.1736	-11.2591
	5.3941	27.248	45.0785	5.46417	28.6388	22.9513
	15.3117	-15.3548	45.4727	26.3295	67.9726	30.3497
	-16.5374	70.6976	68.0722	5.79167	65.611	74.3332
	-7.43348	7.70852	33.3025	-8.49603	60.7572	44.3016
	-8.12531	-16.0679	-5.8436	-10.5786	37.509	-13.6982
	-22.7395	-71.6272	-22.2288	-8.13263	23.3572	-61.1929
	50.4873	-9.73313	-31.6448	0.369968	-49.1234	14.9042
	17.2216	31.9828	16.9631	18.6542	9.81151	-2.21918
	42.3409	-45.7919	-59.8272	-14.1639	-30.9053	-0.438822
	-112.963	16.9855	5.02399	-1.56184	-64.7911	-155.965
	41.4032	58.6535	38.4107	30.4014	-23.9709	43.889
	50.0845	59.6793	61.273	30.0279	54.8742	43.3127
	-95.6228	92.0269	27.4592	30.0236	127.243	136.283
	-1.20456	-3.48046	-4.13355	-0.634118	19.8369	31.6532
	-19.9408	-38.4589	-61.7541	-40.6267	-13.0439	16.7655
	-3.15552	-19.703	-58.6098	-36.8523	-42.8021	-127.673
	-33.4329	-37.0516	-27.9748	-31.7197	-65.5351	-29.5686
	45.0673	87.5797	-33.0806	-22.1666	-23.5076	-29.3796
	17.8332	-77.4401	-43.9144	0.236046	-69.9063	-22.701
	-7.42197	29.8691	-0.235067	-5.31394	3.10703	-29.7248
	36.1464	21.4891	-31.1418	10.5851	-43.1833	-61.7086
	-24.0343	-80.6222	8.69915	-7.28605	-35.5405	17.7093
	-14.7295	-11.8296	-18.2533	10.2439	23.2975	-44.1563
	-3.00024	-80.0805	48.0884	-11.9231	-10.2455	55.3297
	-1.7878	0.476731	-35	-32.8541	-82.3236	18.3983
	41.7987	-31.439	11.609	-23.8711	-38.0549	-72.672
	-21.4825	16.5283	28.8161	27.5314	-24.3917	84.2181
	0.446235	-1.03026	1.36103	4.04621	-3.11455	-0.481308
	-17.6406	9.52674	28.2088	28.6488	50.7623	-69.0073
	71.4678	-90.9235	52.6437	54.1681	77.5444	86.2992
	44.8724	37.1066	2.40984	13.4193	-3.18361	-9.71925
	6.04229	12.4537	7.86356	-10.7457	29.6069	28.7524
	-24.3212	65.0117	14.7165	-29.1951	19.0608	-16.0596
	-19.688	-8.44097	-11.6482	-2.75958	4.77545	9.61839
	-0.00120401	54.1086	29.0457	3.63322	27.3686	-7.65195
	-2.93339	33.3404	24.7192	-5.83025	-2.19455	5.79138
	65.9904	5.24044	-87.303	-29.7175	-27.9811	-23.9828
	-47.1804	-25.0919	-39.2406	3.5971	-31.6269	-30.3995
	26.4626	34.2955	-33.3545	-25.2595	-43.9546	25.203
	-97.6267	-67.136	16.0698	18.2507	-18.9156	-77.1724
	22.1922	28.7291	49.3663	9.34524	53.1504	59.748
	36.2261	47.6231	-14.8668	1.10778	-0.485317	96.4981
	-48.6542	-65.1402	-2.51831	-3.36392	49.9325	56.2307
	-28.2785	-17.3852	-20.5315	28.2172	10.2354	-74.6373
	-15.7236	34.9037	14.8022	26.4131	-7.26835	35.6679
	36.2278	16.9665	30.9367	16.1519	65.9348	51.8201
	-96.3502	41.8972	44.4308	22.443	2.09101	-44.2116
	-69.1746	11.3762	28.7069	4.78568	-22.0755	-61.4712
	-42.2001	-2.29201	15.6521	-0.381653	-11.1117	-22.5865
	50.1739	-43.5554	40.2984	26.2735	37.3769	75.6244
	69.5356	-55.1593	3.18402	51.0168	106.321	72.0347
	0.891927	7.29951	-0.0678604	4.89713	22.9226	12.5355
	1.50666	6.56574	-6.06284	-5.7357	-1.13644	-9.79256
	58.5789	10.8102	-75.0678	-52.9489	-23.1737	-28.2335
	25.1572	-64.7481	-18.545	-36.2699	-55.4112	-125.614
	8.13123	11.1659	27.7141	-14.0841	-9.36245	13.3675
	43.6723	15.9047	62.7702	9.74434	56.1803	101.903
	44.6524	162.755	-25.6944	0.452142	23.4776	-4.95471
	-43.455	19.299	-23.476	-36.7673	-74.7836	-87.8839
	3.53447	12.4278	-7.58133	-34.1102	-34.5466	-18.0114
	5.42977	37.233	-25.7911	-21.6102	-16.6988	0.496548
	-28.7509	50.5843	29.9122	16.3327	41.4102	-29.7959
	39.4374	-29.9651	-14.848	-1.97087	-8.65271	-13.063
	-5.86845	-91.0647	-7.86165	2.52824	-23.5435	-19.3594
	91.0347	-39.8928	-45.961	-5.59461	-21.1594	-41.2533
	18.1635	-6.91252	6.08066	-1.69313	-33.2622	-50.5512
	36.9159	-54.6387	9.31488	-18.2491	56.1623	5.6133
	-65.6358	62.5384	-53.1985	-11.6992	-56.4947	16.7611
	-5.99793	-25.0036	9.19457	-9.32659	-31.5983	-61.4362
	64.8023	21.8489	25.2423	-14.0224	-35.7803	-32.8212
	-31.7801	42.8609	45.383	7.31506	10.0641	44.7899
	-13.0363	-37.9515	29.8793	30.8367	62.1613	27.8569
	-19.1576	-4.60157	35.6829	29.5548	21.935	67.009
	-20.0626	-24.338	-36.4692	14.5677	17.0544	16.0335
	-80.2276	13.3552	-29.5047	7.23565	11.4094	-8.70766
	-27.4646	106.801	19.1748	2.50039	23.9814	29.9362
	-7.85664	-33.163	8.11681	18.7688	14.7921	74.5177
	-2.49765	-0.281418	6.04673	8.7378	4.65544	28.942
	-38.7221	-3.98666	11.2431	32.0876	15.4267	68.6269
	43.9698	24.1538	2.32732	21.8642	45.5224	92.7666
	-9.04951	-56.2113	-4.81216	21.9968	-41.9132	14.3511
	59.9918	10.2249	0.519712	-4.32055	-58.5978	-5.78219
	16.6248	-64.3405	39.886	6.79682	-16.3433	37.6147
	4.26987	58.6078	-9.44409	-31.96	-46.9978	-10.1009
	19.0841	-9.30296	11.5117	8.28373	-18.6059	-126.59
	22.8499	34.5381	52.9	22.3688	32.4841	5.96354
	-26.0135	40.6647	22.9075	6.62463	52.2897	64.2961
	-16.843	53.7635	-43.4119	-26.5572	2.11938	-25.5423
	-40.6526	-48.3007	-14.169	-34.0504	-45.2291	-4.24708
	32.6366	-47.5166	-36.53	-9.45223	-75.1082	-91.1618
	-1.90117	-87.9496	1.17221	9.51689	5.01401	-47.945
	-32.3315	-19.8795	-22.4061	-3.06515	-43.8767	18.9128
	14.1977	0.702842	-24.895	4.49121	-13.8203	-63.4691
	2.08259	-13.708	-7.68635	21.8007	6.94421	-17.64
	-45.9723	-10.1148	36.8666	11.538	20.0811	43.6438
	96.7182	-29.1071	4.65322	2.64456	31.7131	13.4294
	-64.3598	7.54752	-14.6602	-9.88724	-3.73335	-10.9131
	-17.8196	-18.6371	-21.1684	-15.3133	-38.7987	-131.489
	-1.30352	48.4844	-40.9764	-28.9632	-51.4047	-2.24702
	60.9728	-10.9205	-56.0733	-9.75969	-32.3297	-75.2159
	-16.0345	-17.6981	24.0378	-21.8765	-41.2319	-72.0218
	31.447	-22.8953	50.1937	21.7853	-4.99725	8.50328
	66.6943	-9.89263	46.1098	25.6474	61.9516	47.9956
	-60.0997	27.0733	24.6298	27.7257	52.4138	18.249
	-41.8363	-70.3783	9.15082	2.14733	15.5377	25.8396
	-79.2672	23.3843	-21.1133	-20.4617	3.41657	-16.2373
	61.2867	19.8474	19.399	-13.2791	5.06904	32.9117
	-38.8639	39.4	7.44751	-1.0495	100.771	88.6632
	28.1496	-1.21083	0.708875	-1.81934	59.5846	-45.2947
	-6.45104	13.2784	0.371512	-0.351726	60.3102	47.4637
	58.6031	-20.7001	-38.5225	-29.3047	35.7759	53.4844
	17.5682	-59.202	-23.7613	-14.5838	20.9608	-8.95483
	18.1868	50.1463	-15.8403	-11.3858	-6.44069	-59.2656
	-8.76554	55.7978	5.3607	2.73319	-8.669	11.337
	-13.637	-6.43517	18.4738	24.8696	39.1031	35.0122
	-22.8851	50.1676	8.26493	4.8439	-26.2488	-55.4863
	-41.6933	35.3979	32.8728	6.59069	-32.8364	59.8355
	27.0834	35.8255	-34.718	-4.54795	-50.6969	-114.738
	-6.30897	-8.43108	2.65843	-17.0862	-26.9486	6.81871
	35.8463	21.5369	9.90831	-5.77798	39.755	28.2362
	21.4385	-10.2398	-6.99905	11.7649	-47.6732	72.2599
	-76.8134	-22.0654	-34.1527	-4.00738	-4.37627	-26.2445
	-88.1609	-42.4935	-25.3241	-16.971	-84.4651	10.9612
	36.1353	-9.55735	-16.1531	-17.2271	-65.9147	-35.4311
	-16.0837	60.0802	19.8074	6.26729	29.0427	-11.1783
	-5.65798	30.9579	53.6913	34.4266	1.12717	73.8411
	39.0227	-72.2849	14.6233	40.2911	49.5475	73.9923
	-1.3128	1.14442	0.945305	11.4494	11.2479	19.6293
	-19.1997	6.76293	16.7264	29.8645	12.8353	42.411
	-5.50963	25.5784	-28.3631	6.03163	15.5078	129.672
	-17.5508	23.5249	-56.9929	-24.9707	6.71775	-168.475
	42.7729	-21.7351	30.6162	-9.52873	12.5766	24.0568
	56.2596	-20.4725	17.7648	-15.6565	19.4884	89.3354
	18.499	48.0438	-22.6971	7.94197	34.5912	-1.2663
	0.224436	-38.2028	-24.305	-13.8771	-42.8019	-45.1541
	16.6579	-52.1313	37.2917	0.0487429	-47.9285	4.97166
	24.7502	35.7634	-5.83377	30.1794	-32.7998	-46.0113
	-32.5145	1.02291	56.7993	38.1354	76.8819	39.3005
	-18.4179	35.0479	40.0827	34.9747	89.8241	81.6017
	-33.548	-84.5722	-0.56485	-1.57895	33.6485	70.3789
	-33.1796	-22.2593	-51.3883	1.24555	-49.8076	-93.3206
	24.49	62.2081	-39.2897	-24.1034	-14.2895	-67.1001
	60.8422	29.8956	-14.4761	2.32284	-43.0429	29.9698
	-14.0588	-47.333	-45.2217	-0.904838	-9.77262	-99.2091
	23.6738	-44.0886	7.70416	-8.67932	-10.03	-28.1585
	-38.3911	-52.1236	20.4876	-20.5701	15.3482	14.1423
	65.4119	-28.4545	24.4193	-6.0533	19.4274	-100.528
	-14.8233	81.0447	15.8645	17.3045	0.0451958	-10.4831
	14.9489	7.49304	64.1854	13.9873	29.5641	48.2282
	7.41571	-31.8476	2.85034	2.95079	-21.3346	-32.0877
	-38.8243	73.5426	-21.2711	-30.0372	-55.4279	-16.5895
	-72.5753	67.7099	6.23501	-25.0633	-58.7869	-30.6667
	-10.9715	-20.499	-26.8486	-15.2636	-1.67678	18.7187
	24.668	35.7583	15.625	6.97215	4.78653	-3.54828
	-74.3265	6.61977	27.6858	10.0892	13.1763	31.2192
	1.60256	14.122	9.37023	3.43705	12.0937	80.6511
	-19.9217	63.728	-5.77133	9.83871	28.9556	-44.4571
	18.0544	-65.0902	18.4519	-5.48741	-38.8053	-8.84137
	-38.4822	-39.8679	26.4626	7.75982	-10.5525	70.4611
	71.5715	-30.6158	-45.271	-5.31814	-45.9323	-63.2739
	-55.0541	-71.443	9.70112	-26.4461	-23.9212	-33.1816
	99.3266	-30.094	-28.3443	-19.8458	-18.8956	29.7506
	2.40188	61.4139	-75.1162	-12.743	-28.9031	-66.3194
	-15.542	-25.6861	-43.5456	-20.6379	-34.6371	-86.3761
	-10.9704	29.0212	23.9027	-11.8209	29.6023	1.74707
	73.7295	-37.1105	12.607	4.68315	23.1627	57.4941
	54.8479	45.3082	10.9123	35.7367	59.5669	84.7673
	11.4026	-87.3066	36.909	6.87265	-6.61386	5.2354
	-47.2001	-19.3992	42.0017	17.502	83.7864	19.1197
	0.405281	-9.67312	-31.1675	-18.5661	7.36006	-6.81199
	-7.70854	-52.94	0.988177	-3.53665	36.7986	11.2524
	32.3595	-17.7181	-6.57762	8.7157	-26.7724	-39.1986
	2.3852	-54.6904	-38.1667	-2.03448	-7.70659	-77.6033
	10.8567	56.4055	11.6805	-24.2277	-12.1837	5.54151
	61.0602	0.894455	32.5821	-13.9925	24.6431	-39.0253
	42.8426	104.25	15.1645	26.7741	18.2187	13.6294
	-95.8567	19.0896	26.5669	31.3609	49.8449	116.4
	21.5561	0.0387122	-10.8257	23.1256	-13.8001	33.8001
	-18.2775	18.8323	20.1996	17.117	27.6794	21.001
	-68.3237	4.79428	10.9392	-4.58776	-43.717	-51.4196
	7.61119	43.2823	56.0427	16.8754	27.9232	54.5205
	-47.3833	126.295	23.1116	-6.73218	10.5932	73.5071
	-52.8986	44.65	11.5218	9.02759	37.8176	-69.3546
	-31.6389	14.189	18.2526	9.68576	-5.8642	57.5946
	-38.527	-20.1701	-78.5443	-31.4639	-11.7776	-26.4918
	36.0384	-12.8199	-39.2742	20.8687	-8.21295	-108.021
	-0.178699	7.56989	1.22169	6.17524	2.90676	-16.5846
	19.6686	-25.0027	35.0366	22.5442	7.7733	-11.8074
	79.402	-22.7213	14.8874	14.2039	48.2385	33.2301
	38.3332	-76.5656	-1.19719	12.0681	-0.90487	96.74
	-12.9589	-7.00776	-73.6507	-30.0848	-64.6566	-47.1237
	-25.2545	-5.17839	-1.59732	-33.0766	-36.4717	-40.5909
	-10.5111	-57.1219	-43.906	-30.991	-57.3683	-32.2203
	4.16325	55.0453	0.21403	9.78798	4.04449	-25.8871
	68.6496	-22.6867	19.5813	-16.4703	31.0317	69.9743
	111.667	12.4938	-9.78527	-13.3999	26.6938	103.545
	-44.9635	-1.13816	-2.29246	10.774	39.5575	-1.48384
	-33.0186	25.0884	8.11124	22.4335	42.9533	40.5083
	-6.25229	49.606	16.2884	-12.0164	30.7648	39.4045
	-21.1149	59.2226	49.3401	23.622	53.0778	-21.2317
	28.5324	-41.2731	-10.819	2.53774	-36.1753	-29.7425
	76.8116	-15.0697	-3.11419	0.0661043	-31.4531	-3.15719
	-46.3277	9.6631	-27.7839	-6.94255	-49.4718	-32.8458
	65.9943	-35.4014	-51.6372	-38.9585	-41.7596	-45.5441
	26.2038	-18.1669	-1.67441	12.1354	-11.4013	-22.8663
	-18.2498	10.3368	-13.4371	-12.6832	-21.4114	-76.068
	-43.7546	-72.9605	14.5082	1.93308	-23.7176	-12.0984
	-27.82	44.322	-18.7836	-13.386	-9.07477	20.8355
	-110.586	-35.7381	19.6188	1.02489	14.2876	-38.168
	-146.858	32.8538	-6.62401	-34.9009	-18.7269	-33.1365
	-2.45078	-6.43156	-3.34595	-6.05185	-9.03374	-11.3369
	10.4903	25.2657	6.46673	-7.86083	7.57586	31.7061
	31.9805	99.2711	0.575482	6.60561	25.1632	-3.67238
	-4.25914	-7.45211	-0.521549	5.67064	2.94155	18.8171
	69.0176	-57.7293	-9.74939	32.8853	17.5183	84.434
	-9.85406	-24.497	-70.4619	34.1703	-50.3015	18.4056
	-3.98009	-33.321	-1.64454	-14.7157	-43.8896	-93.5752
	-23.4392	31.4713	-18.3201	-21.6905	-31.8754	-50.8111
	32.936	-6.48515	-39.1111	-23.068	-34.6259	-96.6372
	34.4701	-62.6449	47.1199	15.8325	-8.00245	60.6357
	-13.6516	-33.2076	8.12725	5.92835	-7.33208	24.0914
	-54.3353	-1.88301	38.0467	17.4301	31.5396	5.9061
	51.0644	-51.1415	-16.9337	-8.16451	7.31056	32.5117
	47.4249	-32.09	29.0274	-18.026	-22.5029	-60.6962
	20.0832	66.8713	29.5401	39.2576	9.02598	79.037
	-48.0381	-38.0073	15.5301	8.326	26.8059	-13.0993
	-49.9044	-3.74232	7.22259	-6.31394	-10.4739	-54.0803
	4.5863	-1.37977	18.6341	29.8331	20.8003	35.8691
	45.7324	39.9059	29.6164	7.79454	23.1339	157.399
	57.1519	24.8282	66.6657	18.1726	78.2693	109.563
	1.22836	19.779	-11.0556	-26.5608	36.3129	12.5031
	-11.2348	4.80298	-79.4978	-20.4804	-94.4792	-60.8121
	-2.10864	-12.8183	-23.7386	-33.8187	-45.9063	-87.8941
	14.3931	32.0545	43.4262	26.7228	54.9612	19.8995
	30.3348	59.4546	-3.33223	-17.7912	-23.9954	17.253
	-43.4078	-1.9597	0.811738	-27.1771	-23.284	-34.4047
	-35.4515	77.5616	-5.89943	10.3082	-22.6544	8.87505
	-27.6444	-51.994	-38.9507	-14.8378	17.4838	-30.1369
	-41.2171	-37.8051	2.09739	-16.5382	47.2135	-45.0533
	21.9618	-44.8868	30.9087	-1.05122	1.38585	54.6428
	-56.5656	-20.7011	-14.9863	2.5771	-5.62413	34.7919
	-17.6852	-32.2366	19.1049	-8.49387	24.9265	-16.2434
	9.03672	22.4388	-30.8659	28.078	-55.8047	63.294
	-46.3827	-61.8588	-26.4284	8.75666	-45.9144	-9.25871
	-64.2325	2.21623	64.6562	25.0123	0.691271	45.5236
	0.187488	4.37727	2.32624	0.992966	19.4142	51.5485
	31.3944	9.86139	7.43272	-9.86077	2.91992	-68.6424
	-11.6812	-5.48209	-2.37564	-3.53467	-1.84796	-16.0022
	38.1862	20.769	-26.0951	-9.76526	-4.00461	-9.80997

## Sheet: C6
	Fig 2A: Left LGN	Fig 2A: Right LGN	Fig 2B: Right V5	Fig 2B: Left V5	Fig 2A: Right V1	Fig 2A: Left V1
395 data points	-57.7183	-15.2447	-54.12	-26.091	-80.5363	-57.8454
790	32.529	37.8695	48.1682	2.10929	-15.0084	-1.69551
13.1667	-24.3657	-49.0423	11.2539	12.6291	63.1032	-9.20814
395 vols	4.19424	47.4005	-3.98623	-15.0092	-3.33293	20.4652
	4.84995	-26.0752	-12.0641	6.63199	34.6865	6.28956
	9.30102	-19.1921	-18.5721	-11.4074	-18.6844	-13.9136
	10.9305	-25.0168	-7.79819	10.0919	10.6593	25.7165
	46.0908	64.9085	14.976	31.11	65.3589	23.8859
	9.75897	-2.35337	26.9081	11.3785	51.9795	18.1568
	8.03399	3.17646	-3.13227	11.1	12.6291	-24.794
	-76.6468	34.6407	-15.1041	-15.4444	-28.8968	-47.0195
	47.9235	-78.7927	-21.3363	-6.08579	-18.8655	-15.6961
	-33.7493	39.2212	12.9288	16.8807	-4.63915	-27.8394
	15.542	25.5082	8.45974	-19.314	12.2973	30.4639
	19.0344	32.5778	-0.0923514	12.4029	-11.762	-25.3653
	1.03212	37.0394	0.82615	-1.30335	2.8501	-8.50384
	-18.1105	-48.1775	-17.7285	-13.9765	56.8693	34.7642
	-32.8087	-78.6544	-30.0006	-27.4193	-27.3775	-43.7319
	-2.59853	52.4263	-2.11106	-9.74326	-51.6831	-54.2961
	-9.22429	-27.2185	-20.0653	-5.52381	-0.62866	21.796
	-16.0909	8.61822	-1.37496	2.5122	-9.11194	-24.2094
	-3.18267	24.9345	-25.5888	-4.89497	15.0277	18.5972
	-34.8135	-72.6393	6.36316	22.7409	-57.5216	-27.0717
	15.2318	11.2554	16.3935	-17.4529	-49.8941	1.30125
	5.0649	12.4312	9.01619	17.9474	41.3478	45.1037
	-43.7169	3.3674	28.2886	-2.80952	73.9098	23.3034
	43.3233	14.017	-10.8469	-6.71587	-17.1392	-12.4066
	-46.4048	52.9044	37.7805	3.0229	28.546	69.3138
	18.741	22.7814	2.45037	12.0002	39.0435	16.3077
	18.273	-29.2121	-12.4556	-15.3554	-16.3158	-7.33463
	6.61931	22.5435	4.88292	-5.96037	26.414	30.7322
	-53.5135	-18.7009	26.3467	20.5233	-11.6408	-14.3132
	-3.40441	51.9852	25.0065	15.8795	42.3072	27.3965
	28.8215	41.0414	-3.36384	12.8662	-15.7751	3.83865
	-9.2595	-44.7545	-43.5064	3.24103	-31.8089	9.83902
	10.8309	-8.98985	-11.1802	13.9658	-2.28554	-7.19309
	51.0779	-53.4555	-30.8779	-12.0472	-79.9481	-19.7186
	-23.9609	-5.03903	-6.18359	-6.63778	-69.4605	-20.4573
	-27.0928	11.9695	-13.4097	2.55621	-3.86178	7.7293
	34.1279	11.6849	24.732	-1.58973	14.3732	8.94286
	-22.5306	34.2011	11.5002	-19.3207	-18.4804	-14.006
	26.7105	8.76293	18.8564	12.4253	27.5219	5.69587
	24.447	-21.1128	0.522452	10.4034	38.2745	10.8851
	56.6074	0.224238	-7.51736	-20.8863	1.29233	-34.5734
	-5.39621	-70.4499	11.2603	-25.2863	-26.2792	-12.1889
	-6.03148	12.0964	-1.2582	13.0057	2.91624	-17.6758
	17.4278	55.6437	29.4652	31.3522	47.046	36.7898
	-54.561	-71.2944	-9.63618	-5.68902	29.484	-22.2903
	-24.7701	-69.7535	-11.4059	-36.5389	-61.5466	-59.2928
	41.3457	-7.80301	-31.0847	-13.3388	-9.32258	-12.3371
	63.0593	36.9192	-10.3565	4.52893	-6.26244	63.7241
	79.8237	-0.953477	0.677366	18.6439	-18.8805	9.96207
	-39.6116	-29.3632	40.431	-10.4969	-10.3162	-35.8971
	-44.6088	6.24832	-26.5385	-16.0812	-69.0023	-38.1781
	-68.4399	-20.3942	-47.5323	-31.7737	-36.201	-21.6048
	-72.1093	-42.9858	-51.0058	-43.5237	-24.6871	-38.3733
	-20.1683	2.21412	-26.8146	-25.1739	-33.4382	9.35203
	-20.4122	29.1551	-7.86719	-11.9533	-31.6477	-15.8672
	72.6414	-12.7294	3.06248	7.17205	38.1955	21.591
	-17.4415	21.0759	3.57032	10.5203	15.5578	-0.465438
	-13.7053	43.716	36.4983	31.8808	8.8548	1.40749
	78.6526	34.2451	16.9641	20.8478	26.6661	23.7603
	14.9136	22.2116	-5.08274	28.363	45.8569	-6.64911
	-14.6534	105.113	19.9619	13.6595	67.0319	37.1716
	-24.2643	44.7715	28.0738	14.8601	100.322	2.22926
	8.21624	8.66949	39.253	6.6213	7.06382	25.3474
	13.7558	12.7395	-32.2869	2.90169	37.4213	22.5628
	8.26657	8.52675	-22.6574	-1.78581	-5.73655	-22.7395
	15.3172	-26.3014	-6.30336	5.85579	18.0871	62.6365
	-15.7807	48.0251	29.8019	33.6716	53.1966	15.895
	6.59102	49.0007	54.2815	32.8011	49.4048	58.6928
	-37.5179	-49.7911	5.00925	17.8486	-10.7147	27.0919
	-56.5823	-84.6807	-20.9999	-16.5719	-8.88483	-20.9269
	6.25961	39.3037	0.997332	-0.64668	-14.9273	15.7674
	22.1288	14.5593	27.9281	21.7739	5.37315	27.6368
	5.57976	-38.0902	49.8326	56.6864	-0.590115	46.4595
	11.5588	27.1033	59.5509	46.7889	55.814	75.5343
	-7.36311	-33.3894	4.32548	1.0419	7.23261	-4.98575
	8.64522	-20.2242	-11.1815	-25.2613	-121.393	-30.5865
	7.52923	3.37721	-29.91	-20.6269	-60.806	-64.575
	0.614335	2.89991	-31.4717	-22.9984	-63.2237	-7.84898
	11.6057	-2.17312	-30.1494	-44.8765	-72.874	-13.4661
	-4.51075	0.96981	-16.0381	-24.7475	-10.79	-23.2627
	27.8104	-7.68408	29.4708	19.5964	-6.29555	36.0142
	38.2884	-12.6088	-13.6133	14.5124	43.5452	-0.463628
	1.21584	60.4613	15.2624	2.27095	37.5186	7.60781
	14.6669	20.1404	3.93522	11.0731	3.05864	-13.9646
	-60.4316	-24.0051	2.92736	1.06229	8.46517	-35.1351
	26.1467	24.2775	-11.4744	-18.1309	56.1851	10.0593
	-29.5964	-17.4811	-8.5476	9.9541	7.45383	-31.3386
	-46.6618	-25.1784	-31.3676	-0.678615	-4.31293	15.6139
	-5.91869	-34.9744	-22.2894	-33.4247	-47.5319	-40.91
	28.317	-23.2273	-41.063	-22.6444	-26.5349	-0.943882
	-29.7119	-91.0732	-27.3002	-9.95195	7.30551	15.8835
	36.1302	60.7953	34.1409	-27.0099	14.8339	2.56673
	39.4427	58.6793	2.03547	20.2011	5.42702	9.6763
	-29.3985	-19.1534	10.1533	0.599572	21.6676	-14.3686
	-23.2571	39.4601	-25.9632	-16.2607	-20.7465	-23.2524
	-20.5286	-42.9024	-10.9002	-2.03362	0.918882	-39.1185
	-28.9418	19.567	-18.7541	3.38673	3.22865	-28.0268
	7.87941	39.698	-5.92971	-31.0708	-19.7368	-11.4307
	-59.568	-62.0155	-12.5749	-12.3065	-24.5972	-79.6082
	4.15366	37.7756	8.81867	6.58598	-49.1708	7.10618
	-2.54127	-17.2161	-13.0517	-5.74446	35.8631	11.0878
	36.3178	-46.305	43.1993	4.25662	-23.7632	-47.6062
	61.1311	18.0284	20.2661	9.40816	30.5857	45.3148
	22.6157	-49.247	-10.501	-19.6214	1.96971	-8.8323
	-32.737	3.12356	-22.4653	-30.5961	-22.7166	-13.574
	-42.8881	22.3344	-11.4283	-8.56221	-9.73483	6.19492
	-16.6237	57.1619	23.9325	14.8644	82.8193	32.8975
	-29.8728	8.14712	18.9257	48.6172	36.5477	-15.1976
	22.6145	66.7903	40.9292	16.9121	-3.03424	4.36371
	-34.6386	-42.6095	-2.69002	12.8086	16.7258	-0.933134
	10.9122	-33.1016	24.9457	-9.94625	-21.5351	-3.17079
	7.51867	14.1692	44.8556	0.93642	-15.4378	29.7042
	-13.8179	30.4286	31.2014	13.8822	11.5212	8.752
	-5.92389	18.1335	5.28498	-3.61191	-8.97386	9.29191
	25.848	17.2905	-28.6383	-6.34546	-13.7553	22.4434
	-8.76761	-6.53682	-47.7035	-19.2089	-28.2011	-32.6939
	11.7461	-52.7033	-45.1684	-5.75588	-26.6763	12.0896
	2.05014	-75.2984	-34.1512	-17.0836	-10.0976	-12.975
	35.7846	47.117	8.07877	10.2901	12.1523	37.8624
	-15.647	-14.6987	30.9014	45.9293	59.4232	49.7665
	76.3526	38.8948	19.4166	6.0964	-5.80978	-1.89539
	19.8974	-49.0038	4.23952	-2.37871	0.979964	15.6747
	-8.88368	28.4444	-12.7996	-2.30756	-3.21785	-64.6705
	-56.6311	-0.386375	-30.3809	-16.9132	-52.4641	-25.1774
	62.9274	-57.2794	-44.227	-33.2461	-6.29235	-48.6955
	63.5823	37.8556	-15.7512	-32.784	-0.0227266	-15.0666
	11.1295	5.68831	18.3155	15.8224	-4.10525	40.1528
	-33.3693	11.7085	-4.18155	24.7445	6.67734	5.46406
	-21.2231	-24.1449	-11.5131	0.766006	4.48805	39.6947
	-6.98612	-45.3591	15.176	-15.772	-2.99452	-39.4447
	-2.70201	111.813	-5.19983	-13.9273	-39.6093	-18.2501
	8.63002	9.09828	16.12	4.02311	11.6805	-8.35061
	32.5031	-0.153336	23.7896	0.204822	31.1865	15.7154
	4.52729	24.7882	32.1424	10.2995	55.3304	46.9565
	-88.685	13.8219	3.13052	-13.4401	32.0933	9.33453
	-20.9267	19.1053	32.383	26.9143	3.13921	-6.78796
	-10.5174	-58.3398	-2.66898	23.0331	11.143	-15.9358
	-22.9244	-27.8865	-38.488	-18.3537	-83.4097	-16.7557
	14.1428	-56.5417	-32.0849	-28.7965	-20.5349	-51.727
	3.12778	-31.5068	-45.0416	-38.1715	-77.9739	-39.5898
	17.6706	8.10869	6.33312	-8.75626	2.99768	-15.9446
	20.6573	34.0544	45.9085	29.3841	50.1179	65.4649
	42.0133	27.0531	56.1212	47.0606	71.8747	59.7294
	48.1173	28.2734	43.9514	45.1785	36.5215	33.2204
	21.9623	19.9481	34.9135	26.0607	78.0506	74.6628
	-59.0664	26.6346	-16.2585	4.67631	-19.7964	-18.8119
	26.4478	49.5829	-18.7407	-20.1408	-5.89657	-11.1468
	-40.2999	4.68574	-51.0602	-44.6194	-3.80822	-62.9843
	43.5737	-17.3294	-15.1016	-9.34778	-24.6205	4.04486
	-10.6822	-59.1708	17.961	2.38905	-27.126	7.65524
	-8.70517	-26.4421	6.82715	-9.0182	-3.60703	-10.1499
	1.52304	-41.1482	-9.15816	-20.3044	-78.6381	1.48239
	-67.7966	-46.6395	-45.7345	-13.1926	-38.0043	0.485237
	45.6002	1.58912	-1.76045	-14.583	-7.58994	16.9769
	13.433	-65.9342	6.93053	21.3808	-15.7034	5.73495
	3.79715	26.068	-14.6691	23.3081	-16.074	28.5928
	8.12588	10.5957	-6.75516	3.60903	-2.04429	-1.43874
	11.6203	33.34	25.6098	6.48199	10.0933	-23.9777
	-64.4848	-17.7051	-16.9343	22.0357	15.8681	23.075
	11.3485	15.4109	33.4085	16.0813	16.4343	8.03209
	-27.2662	115.596	-2.0658	-0.457149	67.8633	3.96271
	-35.3055	6.66903	-1.88666	-0.294649	-7.19834	-10.0145
	-65.5242	28.6085	-18.1231	-11.1224	-44.0103	-13.1099
	-21.0997	-61.453	-9.42657	-29.7852	-16.2925	-33.3121
	-5.69391	-114.492	-11.5303	-5.3878	29.5189	-22.6704
	27.0359	1.47813	15.3126	3.86775	12.894	32.3877
	-12.5269	-45.2123	35.5015	9.30152	15.861	45.0953
	-1.63541	66.2427	14.9732	23.2339	31.8089	9.76601
	-47.2186	-38.0102	30.0528	32.6785	41.3483	-25.5891
	33.3137	1.71105	-26.4518	-14.153	-18.6936	-5.99779
	30.4316	9.35266	-11.0778	-7.30798	2.89823	15.6635
	1.87682	54.4811	8.65956	2.22081	-33.2329	-30.4454
	-1.87767	46.722	2.81205	1.03068	4.89405	2.51714
	91.6445	73.8826	5.49841	10.4657	20.5765	9.08271
	59.7758	79.021	-10.789	-3.59155	41.1016	24.439
	-12.9262	-54.0961	-15.5285	1.849	-24.7253	-24.4588
	45.9883	-40.5376	-38.3104	-33.4133	-73.4226	-41.0526
	-1.18387	-6.72685	-39.9563	-29.4361	-5.02119	14.1878
	13.3805	42.8663	-6.89953	-5.2649	37.6897	20.8635
	-12.7838	-28.9743	23.6856	11.4833	11.0286	32.2156
	-23.3752	-1.83911	22.1619	21.6274	14.9774	0.924547
	-34.2584	-55.9068	-31.4958	-16.0919	3.99984	-4.26692
	27.0334	-28.4178	-27.1332	-26.5613	-4.17205	21.7887
	15.6983	5.14336	-9.65612	9.8291	-13.7838	-6.73033
	26.7409	71.4791	32.3598	16.1335	-24.3368	24.9527
	3.67221	22.4426	35.2284	49.3056	-12.5875	46.4965
	-76.6026	-16.5691	12.6573	18.8045	19.7005	20.7881
	-13.1636	3.94771	21.6958	21.7035	-25.6845	-18.8263
	4.40626	25.5737	-23.5099	-8.19718	-21.7277	-36.6119
	-4.5446	-12.0314	-36.1123	-32.0853	-19.3897	-41.0483
	-11.6051	9.61795	-21.5204	-33.348	-13.1209	-39.1351
	44.1613	-11.1961	-30.9897	-16.7464	-30.9756	-9.27114
	-25.0413	22.1739	28.8091	29.0243	11.2611	-14.2349
	40.3457	10.3984	47.0219	30.0197	45.8917	54.3659
	56.8554	6.86026	40.3006	17.2192	48.79	-25.7054
	-28.754	-34.9461	-14.4328	-23.9788	-17.144	-37.2111
	32.7243	-67.9203	0.504967	-2.95148	-6.288	-22.3067
	-62.704	-19.9796	-25.3462	-31.5763	-23.4906	-31.312
	1.75932	26.9549	9.09687	-7.0353	17.2014	29.3752
	17.1793	35.5438	15.7149	36.2218	59.1426	51.807
	-5.67181	-31.4796	0.866513	0.395339	63.0818	8.49661
	-26.7446	-46.9388	-21.6295	-4.88082	25.3978	46.15
	-57.129	-59.7634	-45.7966	-25.8039	-44.342	-29.557
	33.8067	-30.3223	-44.6607	-1.12741	-13.6057	8.24376
	-6.04949	-14.4217	-18.3339	-10.1128	-33.7249	-40.3236
	-22.8957	1.70422	52.0703	24.1175	62.3326	39.45
	14.1809	93.0974	35.4375	50.6646	41.1112	44.175
	-0.505438	22.0979	-14.5831	23.9365	-31.2764	-13.2621
	-7.91714	-67.2795	18.5496	-9.57171	5.82039	-40.697
	3.90868	-2.21361	-21.3619	-31.8846	-26.9079	11.3625
	-12.2107	25.5321	-27.3843	-1.71052	-60.7567	-20.7215
	-5.85662	23.9972	25.8745	2.1346	-15.1409	-24.5391
	25.487	13.5938	51.6144	24.8484	15.2249	63.5109
	-26.7012	-17.5939	17.2984	1.54212	-10.0327	8.37132
	-12.3193	29.0183	-32.5881	-23.9485	-62.596	-15.3136
	-48.5594	-29.7957	-62.5235	-36.9413	-78.8094	-43.6854
	98.9521	5.23593	-47.9619	-47.7442	-45.7222	-5.37858
	7.76933	11.0428	14.6789	-9.24566	-34.2851	6.91519
	-8.72171	-23.5168	42.0356	16.8388	87.3399	36.8274
	-9.89624	8.57253	29.711	22.0455	35.9322	-2.95856
	23.8503	59.9364	-1.82888	18.9703	10.5255	55.7787
	-4.03514	-63.0849	-1.61112	-25.4056	0.246205	-37.5504
	26.9779	83.4251	-1.64822	-18.0312	-26.3554	8.61871
	-19.8579	25.3929	6.91554	17.7369	1.98118	-26.0286
	3.01307	60.2586	38.3854	46.7676	-6.27751	83.6788
	11.0931	7.91297	41.214	56.5943	47.0538	21.4316
	-4.76109	26.7665	27.0243	4.81469	27.895	23.208
	-25.3107	-52.8184	6.63069	5.93431	-46.0683	-48.0615
	-85.3964	-35.2233	-17.4901	-19.0589	-11.0939	-17.9308
	0.358412	-19.992	-44.2591	-12.033	2.80942	-3.26718
	55.4593	34.3664	3.03508	0.375986	10.7493	47.5134
	-11.5129	-80.5871	-1.53568	-26.4024	-44.6445	-43.0127
	9.43359	7.66415	-33.7268	-7.89014	0.292048	30.1702
	0.0265296	-17.1939	-44.5418	-18.1369	-0.324044	-7.40928
	12.7434	25.6848	2.16309	-19.6657	4.12407	9.37439
	32.8295	-23.5788	-11.7026	3.48069	11.9187	-12.427
	53.438	34.7343	5.08164	-0.14992	35.5675	3.94066
	11.7984	22.9363	10.8632	17.9028	66.0767	-4.16661
	-45.6017	-51.0662	8.74802	16.7804	40.2568	-0.951148
	25.8034	-20.3302	17.233	3.28726	70.3301	35.2497
	9.7465	-29.5107	-14.1167	-16.5448	9.50735	-40.3271
	-20.3773	80.1723	-15.2882	-22.5995	-34.2759	35.021
	-8.65687	26.7731	-18.7005	4.01492	24.434	15.5999
	76.7447	-12.5729	19.298	6.67686	-7.069	7.67614
	-32.5595	13.3322	-11.4514	1.4891	-34.0061	-36.3024
	-16.8284	43.6729	13.2663	2.31681	17.726	30.1718
	-11.566	54.9422	17.3776	27.5359	30.367	-16.7881
	20.0618	-5.7348	7.13121	11.192	1.49959	-31.4516
	-1.50725	-7.02699	-24.2036	11.5698	-34.4073	6.46623
	-31.5342	-32.0706	13.7721	-13.9987	-8.1573	-60.3282
	-8.69231	55.6753	-15.1677	-40.7491	-8.52706	-3.17967
	-24.3343	-49.3735	-21.1686	-4.71478	-7.11593	-15.9071
	0.427505	42.5543	45.2626	-14.0987	-45.8726	-74.2459
	33.1499	-4.86293	-6.20993	-30.8214	-20.0303	7.51657
	7.549	-59.0631	-2.60247	5.06409	-18.2413	13.0981
	2.01874	0.947028	19.5079	13.5695	15.9617	60.4009
	5.45927	2.97849	18.3342	28.0551	-12.4627	23.1726
	-21.4971	-1.54147	-15.1057	29.5061	46.5733	29.8973
	32.4146	14.2698	22.7458	18.2297	25.9915	23.3129
	-22.6913	-51.8827	15.8156	-11.3545	14.4094	-18.1762
	0.341376	55.2465	-37.4823	-40.0506	-35.2818	-20.5675
	-9.53272	-69.3724	-24.5026	-23.6909	-52.9853	-29.9055
	20.1862	-9.72307	9.83375	-11.2119	10.6992	13.9006
	13.5718	-8.9417	47.98	25.7021	84.0431	17.062
	17.1024	30.4511	36.1619	22.2754	75.5337	9.73275
	0.494207	20.6947	14.1602	-8.15832	91.2939	41.7178
	-54.7901	-57.4142	-12.4095	9.13412	34.0308	-32.9487
	22.4894	11.6944	31.4765	23.0482	38.0924	33.0367
	-65.1479	28.4975	29.2366	25.3874	70.14	10.1672
	57.4534	21.1804	20.8498	-10.2373	9.6584	-21.3632
	-12.9944	-32.7393	-11.8364	-1.09449	-64.4953	-6.85279
	-35.5986	-54.7701	-60.7406	-15.02	-66.5778	-49.8214
	-46.5398	9.89627	-2.68842	-2.21248	-44.3586	14.216
	-60.9432	-28.3356	-21.115	-6.48264	-72.2271	-2.47998
	58.8669	47.6988	8.84145	32.3843	46.2952	5.49403
	38.628	27.2533	16.6206	15.4033	11.3502	15.3594
	-10.4076	48.4428	-6.34558	-13.4969	-37.5034	16.2154
	0.318232	-63.3648	-20.9495	-10.5168	-51.6714	-29.6396
	16.8023	-4.64574	-16.8003	-10.0891	-85.624	-48.1111
	65.6969	36.2167	-21.2153	-26.6001	-20.5132	10.3486
	21.7419	-8.10366	6.0691	20.1229	1.96195	-26.6425
	59.8849	2.72081	-6.48234	-12.2707	-29.2828	-25.8127
	0.233602	2.15023	-4.8588	-8.87742	-12.0095	-27.8705
	-85.6573	25.9153	22.3801	6.76312	23.565	21.8478
	12.1586	-11.2801	5.91656	9.52629	64.9468	27.4831
	33.2763	95.5874	59.2615	24.7384	40.3088	90.6375
	0.581643	-40.5319	2.65376	14.2666	30.2943	12.3229
	9.38774	63.3699	-15.4402	1.89613	-29.9459	1.53118
	0.849231	-10.8929	-13.799	-20.16	-63.5566	-9.9073
	-75.9139	-23.3845	25.9443	15.5722	-36.7317	48.2626
	90.5814	-18.1765	29.4371	27.5817	34.0757	38.5428
	73.4584	24.8789	31.3334	7.93878	-6.07767	33.3732
	-17.8194	1.06383	-11.4735	7.6603	22.3252	-15.6235
	-5.74416	-29.5038	11.3023	-21.8186	-20.48	-16.2333
	-28.5369	-58.884	-50.5092	-30.2989	-57.7878	-4.07917
	-1.90676	47.9885	-21.9686	-17.3956	-8.81146	-10.0126
	-35.9939	38.0933	29.0131	17.3185	63.5204	1.33484
	49.4913	102.051	18.4399	40.7797	57.6023	58.5957
	-9.36504	-23.6041	9.15713	13.3251	48.4584	13.0573
	21.6595	-61.8241	-43.0352	-38.4055	-36.5688	-61.6817
	-51.7665	-65.4001	-57.12	-21.1543	-35.0035	-66.4926
	28.7801	-6.43558	-5.9127	-24.0698	-31.0951	20.5543
	-27.2109	-51.045	29.8334	-16.5883	-12.1477	-47.9542
	-35.0725	8.92064	7.3272	-0.27074	30.127	-12.7733
	-18.1961	-9.91146	-25.3775	9.31701	-12.8455	-18.421
	-51.6645	-23.574	-7.92162	-19.8845	-6.60677	-8.5188
	20.0807	-44.2181	-8.85463	-4.92356	-25.2591	11.2249
	-46.301	81.179	-55.1295	-13.5969	-11.8916	-60.9832
	35.4211	-25.8097	7.8291	-6.34606	22.8218	10.2099
	-4.16258	25.899	19.3129	30.6036	16.998	-12.6289
	0.66331	56.6039	21.2193	14.0333	-37.921	-1.0624
	11.7735	-49.2633	-7.2848	21.4668	-13.5735	-18.5311
	-6.26047	-63.2049	-2.26231	-5.95781	-21.0868	-7.75522
	37.8017	-15.5422	17.0666	-4.13324	4.3696	31.2989
	-16.8698	-6.0793	0.92785	2.89157	-36.9831	-2.1391
	3.12179	-6.5111	22.9134	-4.09805	-33.7245	34.247
	16.8201	4.29824	-9.93103	3.91754	13.2617	7.24576
	15.9995	-0.32582	5.23909	5.31949	-3.93127	28.5203
	10.1384	-0.891389	-11.8476	2.03856	13.8664	8.78553
	-48.0672	15.435	5.5532	9.75595	-38.9939	-21.7639
	28.1014	20.3471	48.2547	8.25593	-1.6611	44.2662
	-1.38479	-0.40177	-30.5594	9.17323	9.82063	2.05469
	68.8708	45.5542	38.1572	18.2846	15.8634	7.88196
	-3.81275	72.8155	21.4359	23.9105	23.6197	22.6502
	1.38081	79.4752	25.4775	8.15824	8.44308	15.0998
	-39.3829	-74.6425	-9.62913	-9.37858	17.4995	-36.8489
	-32.637	-44.7993	-37.2535	-28.5275	22.5867	-22.4062
	9.95278	1.52449	12.8399	-10.3196	-11.144	6.58353
	-28.5905	9.06137	4.98835	-13.5448	-1.1303	-10.135
	23.304	0.303805	8.67971	-20.8826	8.59384	13.5617
	44.0876	-3.48751	-6.18519	-14.9154	-21.5575	38.2075
	17.8427	43.0432	-3.06882	-19.5604	-34.624	-6.14354
	0.601207	-72.1686	-47.8492	-37.9096	-36.8082	-76.0282
	9.23603	-9.00916	-36.3122	-32.076	35.7228	27.2104
	-29.4669	76.1311	19.9534	32.3131	49.5047	1.9109
	-13.2684	-0.635702	31.9978	15.4557	77.7294	25.1019
	-22.0386	-57.191	-10.6197	16.3119	18.0392	6.46491
	-5.26034	16.166	3.56203	24.4039	7.54487	-7.6805
	-4.06523	30.8227	29.2961	1.29831	33.6085	-3.05518
	-41.6276	-33.4696	-8.50181	5.94575	-47.1423	-1.85173
	-24.721	-45.9954	-12.3885	5.45075	-41.7507	0.382564
	29.7408	-53.9808	25.5577	44.3146	35.8127	28.0116
	27.2377	95.5534	24.287	23.5778	90.6123	63.919
	-28.4138	27.3962	-20.2296	5.45867	-17.4582	20.7366
	43.4151	29.2814	-21.6802	-27.4062	-32.8948	-17.5853
	-14.7044	-60.4565	-39.92	-24.714	-21.8507	-8.77373
	-53.4109	32.4936	2.54587	-27.8483	-34.673	-59.593
	50.5168	-43.8742	5.46262	-20.6991	-47.2059	-46.5867
	-28.4779	22.2647	17.305	7.05671	-35.5013	-43.1895
	21	57.3347	21.5087	-3.77424	20.0155	-0.548193
	13.7892	-9.57067	-0.772511	19.6333	-22.6511	-51.781
	-12.5385	-12.4855	-18.5275	-20.236	-27.337	-20.0838
	-19.805	12.6338	-6.42053	-23.9888	-16.2062	-5.85509
	-7.79241	25.8336	-20.8777	-18.4778	-30.4587	-35.9304
	1.4505	0.165845	-3.73424	2.90569	5.22681	15.74
	-35.6284	27.3961	7.95003	26.5617	25.7615	11.7552
	27.7865	-29.7729	22.5972	8.1325	67.5828	6.49726
	-14.1615	-22.708	-36.8275	-37.2812	11.1192	10.1973
	2.26381	-36.1555	-46.5717	-28.5358	-50.0492	-37.0773
	30.2511	14.7133	27.9153	-18.4047	22.4849	18.4033
	-14.0648	9.71048	11.4923	2.37034	7.01602	10.2209
	-21.6689	23.468	-1.24199	13.892	36.875	30.3729
	-28.2002	-2.40483	-1.20444	15.2964	35.0451	11.0377
	-22.2358	4.11218	-2.71346	3.84449	1.87898	10.273
	1.21001	-82.2128	-33.166	-16.9107	-42.3682	-37.9022
	-1.01606	-26.9922	-15.9924	-9.92002	-25.389	-6.83509
	29.5581	29.7628	23.0459	8.25451	6.09929	13.7666
	30.9872	20.0434	27.5642	30.8044	46.251	32.1589
	30.4781	-0.480244	30.95	1.72702	58.4057	9.60402
	30.2997	37.0498	-4.17356	-1.57069	14.0743	31.1959
	60.4759	23.0724	-23.2716	16.8008	-2.97086	-14.6623
	2.64811	38.2107	11.1791	6.13843	-7.59356	17.2143
	40.2464	-20.9786	2.78273	-26.0884	41.6985	58.2645
	-9.99296	4.70604	-8.22272	12.938	34.4091	-27.1556
	-13.4451	-22.2609	22.3301	17.7584	-70.9759	-10.849
	-53.7394	-25.2519	33.9053	1.61945	-12.6301	-40.2925
	36.4755	-30.9535	-40.2367	0.90842	-42.0851	-24.6766
	-19.2162	-47.0036	2.89754	-13.7126	-26.8473	-21.4428
	19.7924	-49.234	-25.1345	-19.144	6.85561	-0.26883
	2.1729	16.0562	5.88888	-3.97407	-14.8804	-23.6685
	-43.9298	-74.0538	6.64387	-6.04973	-19.8034	5.99779
	24.8267	0.0384697	7.01088	26.6645	23.8739	8.14827
	32.2927	-10.0831	37.4583	20.5867	32.8127	79.6763
	9.2975	-29.2048	3.28366	29.1498	-10.4395	-3.44928
	-67.7976	-65.4285	-1.46133	21.3008	-31.0973	20.9598
	-12.8375	-10.2432	10.0632	-7.05219	16.5718	-24.7555
	-21.8304	-28.6755	-14.6122	-34.5536	-48.5276	-3.11528
	-21.9098	7.08533	-31.9387	-10.4336	-28.5902	-32.7764
	-30.3268	38.9606	-3.75041	1.71838	-0.481484	-8.09242
	48.0498	33.9882	22.7059	15.6192	83.9634	29.4627
	-50.048	-30.2438	22.3784	8.73883	25.4231	3.16236
	47.6209	-7.7497	-26.9713	-21.5287	-71.9778	-16.947

## Sheet: C7
	Fig 2A: Left LGN	Fig 2A: Right LGN	Fig 2B: Right V5	Fig 2B: Left V5	Fig 2A: Right V1	Fig 2A: Left V1
395 data points	-9.58741	49.9117	14.0402	3.0534	22.3723	-24.7619
790	8.33527	-49.257	-3.27687	4.23665	-9.56275	7.78409
13.1667	19.9087	-34.9616	-3.57853	-19.8476	-33.2709	10.3644
395 vols	-38.3787	27.334	-17.8578	-15.4233	31.7137	16.9827
	4.40703	-20.7535	-33.4262	-9.29922	-37.0184	-18.0242
	67.6535	-14.7138	29.7299	26.3572	-28.275	-7.34144
	-60.2236	49.8917	23.4019	19.6799	43.032	13.046
	27.3163	28.4599	12.9613	23.8648	17.8884	-1.00767
	54.3103	22.9542	15.6407	9.79713	-28.9165	-11.9295
	-8.78619	20.6775	-41.978	-33.987	31.4787	-3.26962
	-119.813	-43.8117	-28.4569	-25.6898	-39.0411	-13.755
	55.6231	-22.9802	-24.3968	-5.80468	8.91383	19.6162
	-13.3747	27.3311	57.7634	46.3372	56.0982	63.6581
	-15.4284	119.175	84.802	57.0781	70.0887	50.0774
	85.0871	55.853	17.3842	-1.64562	17.069	34.3165
	59.8854	0.434733	-29.7462	0.614607	-19.1436	-10.2379
	-9.02509	-31.3941	-13.2536	-19.8868	56.1963	48.4714
	-81.9863	12.5676	-23.2421	-9.71325	-0.206425	-50.4013
	0.0573714	-32.618	-8.37683	-11.2628	-24.3961	-1.31402
	-12.1556	-96.6406	-5.61112	-3.99804	-47.1198	-41.3604
	19.4386	-4.83401	-11.6788	3.4115	0.0552392	14.7374
	28.4135	-33.4848	16.5756	25.4758	7.26451	-7.52099
	40.2605	18.4724	8.26683	-21.1065	-13.3445	7.97491
	23.6921	98.7591	-15.4576	-4.93556	5.08371	-3.47616
	28.6343	-16.3121	1.8602	10.6302	-0.315572	27.8206
	39.6941	46.9415	4.63054	-8.61617	1.61654	-19.3852
	-41.927	-72.3122	-17.5969	-9.90085	-29.197	1.18877
	-17.6177	36.8788	9.44561	21.9109	22.7833	16.5693
	26.2674	33.6648	21.02	11.3681	30.2721	11.7928
	-3.81083	16.6566	-43.8974	-19.5728	33.7415	22.3607
	-28.9314	-26.7784	2.49495	-18.4853	-26.9671	-4.71992
	58.4697	-13.5603	-22.0202	-17.9055	-15.5757	-28.0274
	-50.725	5.09347	6.2947	15.5764	0.432266	-27.0757
	112.514	-2.2315	30.2208	30.3828	52.1546	58.6492
	17.1741	44.1004	8.72686	25.1217	29.4676	26.466
	32.7364	-42.513	0.828693	3.75714	2.59251	-13.1828
	35.2044	34.8819	59.8148	62.7166	78.5257	65.6266
	-81.1806	120.174	57.8422	26.8859	44.6832	34.6501
	-20.4644	44.5468	8.79508	6.44686	-31.7905	-9.9148
	-3.82976	-118.719	-24.4846	-36.2088	-45.1182	-56.9805
	-18.3304	-81.3436	-7.39379	7.03457	-19.9068	-34.8999
	-3.52324	36.3367	14.6455	-3.52189	-10.1879	13.8112
	51.9109	-20.025	-10.1907	10.2825	3.74732	14.7023
	68.1301	60.6307	15.5611	14.8856	16.582	23.4619
	-9.01051	-25.5212	11.0428	11.2363	-10.8833	35.4654
	-36.8899	44.9992	-12.524	8.70149	-33.5081	-3.4921
	-0.457191	-8.32438	-30.0766	-10.3325	0.0877351	-8.66626
	14.7574	32.5992	3.58929	-22.6666	2.96157	-4.79468
	-81.0892	-38.4718	-33.8466	-23.104	-48.1336	4.25912
	66.6712	-115.561	7.43109	-12.7365	8.97047	30.5487
	7.55722	-2.03188	-2.8898	-0.447063	36.1281	5.70923
	-150.499	78.4449	-5.14338	19.2043	-46.6784	8.4896
	57.296	-41.6925	-5.40426	-23.2215	-77.2588	-57.1873
	-56.2437	-43.6103	-12.9247	-19.8651	-10.632	-46.35
	54.7432	-35.4607	29.6276	-8.25763	-0.120895	6.8003
	-40.2808	28.3882	4.65659	-20.9237	54.661	19.319
	21.9009	-11.7628	-28.2591	-11.5735	-28.4287	3.37671
	-97.4453	-58.0551	7.9745	-14.6612	-53.8606	-54.2982
	-44.4066	20.9896	-12.2202	-39.2746	-9.599	-50.9363
	73.5742	-6.78372	-12.6886	-20.4439	-5.56363	-22.2598
	-88.3592	-45.4467	-13.315	2.71093	41.4525	-0.97457
	16.0018	11.5315	1.30333	13.6898	-18.7531	-25.4607
	39.5427	34.4015	-5.0364	-1.32601	12.9946	8.92461
	-25.2231	115.204	2.93111	35.6675	-1.10673	22.0963
	-34.4148	-43.5188	14.8904	1.49597	-23.3146	-46.9138
	2.83869	13.2284	-25.2433	-37.3749	1.59861	18.1889
	16.8333	-23.0011	-27.8226	13.6089	-7.19476	-13.8426
	70.4307	-45.3924	-13.886	-14.5018	-7.58508	-6.98149
	45.6243	-4.25859	27.1399	-0.580148	20.1124	21.5898
	19.3287	19.0482	-10.28	3.16759	12.7006	22.1504
	-18.5348	-75.4695	6.16034	0.997037	5.50017	-1.90301
	-35.3128	69.3138	-3.21501	0.701365	5.35827	-8.81479
	9.28868	-21.4123	-7.46175	18.5759	24.5257	-19.7088
	30.765	35.1983	24.0465	35.2435	37.5377	55.2714
	58.4927	-26.9286	36.4704	27.1059	30.1242	22.8352
	-14.2042	-44.4298	9.20354	-15.2207	0.815724	8.33942
	17.5447	5.97468	0.538952	-14.822	21.115	8.90724
	24.8862	2.55957	13.2161	30.1283	30.2698	42.511
	-32.3283	112.299	-9.07794	13.4204	-8.14832	27.0015
	-91.5695	-12.1068	-22.1552	-58.3704	-48.3757	-63.6508
	-34.3236	-140.356	-6.4456	-1.59974	-45.8991	-31.9702
	-0.470214	-3.22724	7.11078	-5.66003	29.6088	27.5419
	-30.0506	-11.412	-3.87269	-19.878	23.3557	8.30869
	34.1614	-59.9374	-9.76707	-4.92214	-13.487	-28.0534
	48.8538	3.17916	17.7785	17.2604	8.59222	9.11872
	-17.2045	38.7851	-3.00743	-4.90861	-8.11771	-14.5605
	32.0058	17.6171	-21.8974	-22.0281	12.9879	-17.5391
	-16.6322	-3.53927	-38.8974	-24.5204	-12.9133	-15.5544
	-37.9298	-48.69	9.71107	10.4475	-30.2345	-34.5674
	6.24819	11.7306	-10.0466	14.0666	-26.0625	-19.9798
	-69.1625	121.344	3.04073	-18.7205	-72.3809	-70.5146
	-16.0613	-20.4259	2.47257	-0.113741	-10.6865	21.9796
	-11.5699	-2.93478	-9.13293	19.6583	44.7654	31.574
	50.2469	18.5628	-19.7424	-15.7358	-44.4616	-31.967
	12.6651	67.8233	-12.2613	2.96881	-2.82675	1.39184
	-43.7635	12.3462	-2.63297	51.2918	-14.1778	-21.7859
	36.616	33.1871	44.9681	42.4336	-16.6277	-13.0074
	-23.0087	-57.2838	65.4917	27.3034	25.2175	6.85458
	76.0915	3.11729	-0.916683	-12.6702	44.9264	17.4008
	-30.7767	-2.4492	-18.3819	-16.7929	23.9862	11.9737
	-30.4731	29.0787	-11.4889	-9.65662	26.251	11.1004
	-26.4805	-50.9529	-12.6579	-19.5721	8.05445	3.04431
	-1.56735	147.746	46.1259	33.4181	13.0386	39.1417
	57.3007	-88.1131	36.7065	43.3346	-4.07563	67.0968
	-6.49672	111.474	5.45714	8.4134	27.9882	55.4436
	41.7159	-11.8424	-10.1893	-22.3737	20.6926	-1.30458
	7.65238	-107.888	25.0065	-1.06053	-14.2315	24.973
	60.7968	50.1379	23.0534	31.4879	28.3009	-23.3123
	-82.2771	-42.5815	-26.1908	-40.0558	-74.369	-52.3475
	-68.8059	-51.0784	-8.69407	-14.3983	-20.764	-53.1381
	56.8274	-8.05528	12.0934	32.7468	15.5817	32.0138
	67.7037	-12.0763	46.5041	17.3175	19.5763	13.9229
	28.5976	26.714	-6.56735	-10.9685	0.521841	-33.0273
	-9.47012	-42.684	44.0037	28.7254	26.5321	19.1277
	39.3538	2.97923	-27.786	-17.0384	33.0231	7.04691
	-11.5033	71.7756	-25.6902	-18.5829	15.5872	30.7399
	-129.167	-1.67659	-57.9852	-50.9672	-42.2085	-55.3775
	-85.7212	-2.3906	-38.7177	-57.7055	-105.157	-83.682
	-39.482	-123.846	-47.9697	-22.7208	-33.2229	-13.6408
	-0.570263	23.3572	-1.885	-0.00732424	-7.71925	22.2548
	9.86245	-19.0963	-15.98	-11.5524	-3.63126	-16.4753
	-17.0792	67.9866	-5.13411	4.81605	-29.6709	-47.3022
	29.1953	-32.4042	12.2525	37.7461	-20.7377	-15.8173
	16.2386	-48.5088	17.7294	48.3039	10.0036	5.74042
	3.06089	35.667	32.949	65.2819	72.851	43.1114
	68.4005	77.475	21.8405	32.7558	65.7575	68.5897
	17.4181	19.7619	1.08987	-23.3769	-1.72441	21.4809
	134.686	-31.381	-17.8213	-26.3536	-39.3874	-52.379
	83.2892	10.0638	72.0882	47.1336	104.598	91.4552
	-93.7366	148.246	27.947	20.3399	75.8878	58.5228
	34.0616	-1.25484	-25.1741	-41.8905	-7.25944	63.0631
	-68.5778	14.0624	-35.14	-46.7732	-56.9706	-17.2325
	43.197	-46.3343	-12.6656	-30.1243	0.386612	8.25741
	-15.1023	-59.7564	-24.6998	-41.4643	-17.1643	-66.548
	39.6188	-40.9146	-47.237	-21.1925	-54.1259	-27.091
	-67.4486	38.4158	17.4704	21.2182	-2.23526	-5.63119
	-9.59778	2.30307	20.4014	10.4362	82.912	84.2882
	-12.7572	-16.934	-22.2216	-17.8918	17.9988	9.48288
	-92.0463	100.889	-12.9181	-22.2007	1.46756	-6.24267
	41.0223	-33.9277	4.58403	22.3292	17.0142	-2.32255
	-56.9599	-107.217	-2.74061	6.31466	-38.4625	-51.1825
	33.3835	-17.3979	11.5253	30.8441	-1.76715	-35.3002
	-15.3612	-70.6248	24.849	28.9956	-45.343	1.25181
	-9.42904	55.3051	31.7008	-9.31392	-89.5778	-47.1471
	29.5701	35.6012	11.4888	13.2677	13.3465	12.2626
	82.423	11.0714	20.5578	11.8257	56.7824	55.7641
	16.2897	-66.8454	15.5349	11.0992	83.3517	70.717
	15.8069	57.4078	-4.3412	4.47047	-11.8558	-1.24578
	-10.8528	-8.62399	20.882	-6.27152	-13.8643	6.72759
	-20.0526	-13.2797	-21.1102	7.58063	-31.7133	-37.8626
	-63.3365	112.907	18.2497	-0.128822	-48.8221	-3.32937
	23.2345	5.80613	32.2053	26.8927	-36.7665	4.91933
	10.6545	10.841	7.32424	45.1121	40.2578	2.90489
	65.2455	-55.2349	-0.283783	-3.53484	-31.5713	-62.8375
	71.1107	8.21169	29.5321	5.49311	80.6531	30.4271
	29.884	-74.0697	-11.5823	1.20783	-19.3568	-17.4625
	-70.8953	23.01	-28.5714	-15.5606	1.26391	-19.4064
	-32.3536	-57.1097	-10.9276	1.08328	-31.1898	-63.1506
	-55.5608	19.8471	0.74025	-23.9315	-53.5428	-75.889
	-42.7335	10.2765	-38.2835	-41.7178	-17.2366	-16.0087
	-33.1616	-22.3811	-11.8137	-1.11417	15.7601	-7.17151
	63.6929	26.6561	36.1882	40.2033	75.827	69.0119
	2.46416	4.70891	32.8289	7.95281	69.57	103.081
	23.3542	12.5919	16.872	-7.67685	54.0266	35.637
	-22.1569	14.8191	-2.64704	-12.2292	-3.57684	-23.6922
	4.69228	35.2291	-14.581	-16.0332	-19.9561	-4.03819
	-71.9245	-50.4094	-24.7019	-49.9442	-28.637	-44.405
	3.89845	-67.3367	-14.09	-4.31436	-14.0754	-12.1553
	13.4611	24.0827	-39.475	-20.4997	23.1403	-11.7315
	-36.6243	43.856	-22.7614	-34.9493	-25.4963	-5.78866
	67.1522	47.5715	-16.9141	-3.71524	-22.1921	-24.6581
	-13.7652	34.905	-3.66473	0.355629	-46.3173	-16.0238
	-63.6466	-69.1949	-20.5468	-12.6495	10.0845	-21.9252
	-52.6907	-35.7953	-27.2412	1.18277	-41.5576	-48.8868
	-34.6789	-39.4562	11.946	9.27965	-49.8824	-22.1489
	-7.51119	92.1472	16.7103	49.0986	44.7328	48.9119
	104.884	28.2333	59.693	52.4383	69.4235	64.5295
	83.7756	77.7837	14.8653	22.8154	56.6747	67.209
	-34.8453	88.2661	-18.8191	-30.2017	3.61796	1.78535
	-14.8168	-4.5492	-29.7303	-35.8038	-47.2671	-0.21504
	-68.7311	-22.8682	-26.8599	-37.7765	-38.3337	-76.5095
	43.6581	-68.7334	-1.68773	4.64039	-50.3083	2.708
	-82.8374	-56.6831	55.1871	56.6018	32.9222	57.1725
	-14.1511	-27.2156	28.2958	47.7084	11.9756	21.1327
	48.0276	40.3297	36.9636	44.2509	19.0606	-1.54597
	51.7029	-12.5041	19.3149	13.7102	70.8992	31.7405
	53.5941	11.9453	11.0999	-0.508682	25.8788	45.8499
	-31.7314	-11.0528	-35.431	-11.1573	-1.39459	12.3001
	-24.0781	30.5146	-38.8818	-30.7841	-46.9236	-21.918
	47.1272	-68.3178	-6.85865	-24.2091	-3.86059	-15.024
	20.1452	3.39542	-30.0474	-19.4445	-43.7389	-42.5847
	45.349	-50.2346	-20.6941	-10.7283	-14.3373	-42.9539
	-61.696	72.5055	-15.0328	-21.3044	-26.6224	-22.3835
	91.046	-10.4362	29.4528	5.32335	-7.3056	22.775
	-8.28325	22.7747	-2.7301	-0.698345	6.30997	-14.2015
	86.4829	-10.9558	39.247	33.5759	58.377	57.5261
	-48.3847	-6.32363	67.1266	63.9464	47.1593	32.1922
	-43.4654	28.082	32.3836	26.8259	45.6578	10.1024
	108.526	-36.7914	2.81763	-20.937	8.76224	21.9879
	35.7312	53.9502	-17.776	-14.1648	26.1712	22.8288
	11.926	-108.167	-45.4714	-25.0966	-1.2981	2.29943
	-96.6752	-71.9182	-50.0991	-70.4545	-69.3507	-52.276
	-47.114	-35.1048	-44.257	-68.9825	-77.7978	-51.0239
	-100.484	-5.74582	-58.5568	-56.0482	-29.9679	-61.0916
	-72.267	43.7909	-54.5111	-50.7466	-49.7967	-5.27422
	-29.1697	65.9582	11.8134	6.35558	3.48988	2.34904
	68.2425	-96.8449	6.33323	29.3731	-40.154	1.98326
	-138.293	-12.3143	-18.5454	-21.0756	-50.7711	-69.4611
	-24.6609	-39.7718	13.356	25.2578	-3.26983	-15.394
	77.835	3.71454	30.5475	56.5306	10.1917	14.2748
	9.3565	69.7095	40.1873	46.5303	58.6286	56.9634
	28.0778	52.963	13.7916	26.0543	41.7264	38.5926
	96.4079	16.2326	10.787	5.44672	-2.03324	15.8683
	-56.1058	79.2614	-31.0401	-24.8275	-43.5428	-5.29916
	26.8928	-37.5377	-25.5461	-26.2713	-27.8323	-8.97422
	-56.0969	-30.1354	-25.9859	-19.7034	-17.6595	5.61815
	-71.7408	-39.4863	11.0796	11.0262	-18.1067	4.55562
	24.9005	-4.24438	10.683	-0.0737403	10.0452	-0.922765
	89.9607	23.4446	-16.791	21.4194	24.0914	24.5349
	-82.816	-28.268	9.76848	-16.9347	-6.26188	-11.0873
	-26.0783	-30.7491	37.5837	-3.43844	-15.9032	-23.1906
	6.9279	42.9021	15.0683	13.2625	26.5725	2.18292
	29.9005	56.6147	58.4508	30.9515	32.1406	-6.97329
	85.2375	29.5523	53.2938	75.6975	65.3222	42.6513
	35.1329	-24.7228	48.3989	55.5044	81.4124	16.9782
	38.9205	-25.718	10.3862	18.3998	15.3083	30.1458
	-98.6192	-47.904	-6.36756	-5.03647	11.9047	-31.1898
	-84.4321	-52.5774	11.7677	-10.9355	28.686	1.13972
	87.3038	-6.34728	20.1667	40.8541	29.349	2.87074
	0.810959	-13.7729	40.1623	15.0432	75.3903	8.75889
	94.8209	-53.9056	-3.18808	-8.11486	-35.2652	-14.6849
	10.5374	42.7009	5.91659	-10.6234	-71.5209	-69.9348
	62.9954	53.3241	23.5211	2.01334	30.439	-7.08677
	81.5646	-51.2156	5.96707	12.4455	71.3168	62.415
	-92.7815	40.3952	-12.2848	-37.9162	10.7135	17.3449
	58.1966	-7.84472	-48.5351	-46.6921	-68.9455	-46.9675
	-78.1056	-50.7035	-65.2335	-28.5476	-103.073	-73.0183
	-64.7521	17.0468	-54.7488	-47.3502	-58.3101	-27.8518
	-160.115	72.7048	-16.4361	-13.125	-39.7161	-43.8042
	-68.8603	43.8053	8.06298	-16.981	-70.6775	-41.8694
	99.6738	34.8911	-5.67795	-7.16692	-27.1939	-16.0075
	-83.0264	-7.21466	-5.57894	18.3731	8.35633	35.6691
	120.414	21.683	-10.2775	14.5785	53.8296	51.9013
	11.6732	-17.0343	-38.5032	-38.2297	36.9901	-16.0497
	8.81497	76.9255	-21.9849	-12.441	12.5546	20.3391
	-1.2659	72.2189	17.007	-16.1636	23.6039	24.2715
	-82.2282	-23.3636	-21.6206	-44.6659	-5.94946	1.94763
	55.8103	-79.1725	4.59123	7.03487	2.62659	-3.65276
	43.6974	20.4947	-1.79272	9.56012	34.8993	22.7359
	-22.8525	-19.5502	1.12222	-1.11384	4.86843	45.6038
	99.4511	53.6072	-15.8722	5.62498	2.61306	18.8105
	3.53708	28.8471	4.13449	0.982924	16.5521	-1.02367
	-111.402	10.5009	-8.06033	-27.7304	-58.8114	-38.4803
	77.6216	-33.5815	-25.6337	20.6751	14.3726	-4.81393
	58.3505	66.6169	35.5788	19.7359	41.6198	46.7316
	12.0609	-20.4241	40.7267	38.8028	2.10254	20.3732
	-0.403695	-51.133	-2.35539	0.158985	2.23094	27.1655
	-44.522	-74.3931	-20.536	-19.3139	-64.5338	-75.9994
	11.0073	-52.6341	-19.9882	-19.6188	-13.6879	0.117789
	-63.6204	-46.0512	-0.782509	-22.9339	-23.157	-41.674
	32.7388	-22.151	25.4806	24.2257	-54.3983	-13.6284
	-55.8925	12.9039	-9.63599	34.9114	9.88372	-13.9826
	-11.0432	17.497	48.8271	41.771	54.0766	8.59312
	57.4053	78.5816	8.5512	20.9291	64.7276	30.1906
	8.8695	10.8211	26.3784	17.2242	66.8409	63.2288
	6.23992	25.9421	28.4959	0.420265	39.4027	39.2762
	-1.03942	-153.298	-15.187	-6.87748	-23.6335	-33.3098
	59.7924	19.1451	5.30322	3.07844	11.1292	-10.5586
	-34.7564	-32.8775	13.5276	15.3977	-38.2813	12.4788
	-81.1992	-2.33886	6.78961	34.2855	-10.8858	1.32271
	-4.1858	-69.8248	28.4329	43.1032	-65.0985	-23.1355
	33.8059	-39.3814	26.8591	0.661677	28.5878	0.650456
	-74.4944	37.0184	21.7846	12.077	38.4336	39.3325
	-11.6379	19.6644	-14.2202	0.0218231	20.3285	13.5194
	16.4998	-2.94155	6.62912	-5.93627	-19.1065	-30.0992
	-57.2522	29.2328	-19.0485	-20.2297	9.73069	-2.3936
	3.00754	-40.115	-24.7129	-33.1545	-61.6569	-79.8407
	-67.744	-74.5652	-17.6427	-38.3352	-116.838	-87.5691
	-9.9352	29.4592	5.23443	2.52488	-14.4059	22.1668
	15.0023	58.7897	18.2363	36.5023	77.174	47.2061
	60.8779	89.5538	24.8804	11.7505	44.037	50.973
	18.1194	-36.9787	-32.4538	-6.48948	-18.836	-25.9745
	-106.054	10.7876	-34.6325	-35.555	-49.4419	-26.6503
	-25.6566	-77.6508	-45.2988	-45.656	-39.5198	-9.67011
	-0.924872	-1.41692	-53.2771	-40.945	-6.52753	-21.4912
	51.8231	25.1421	-22.863	-19.8364	-16.5303	-6.29587
	-2.51351	72.9872	-22.358	-19.1485	-1.60866	23.1699
	134.809	62.1785	2.62555	3.48258	1.57731	8.65866
	23.6672	19.9477	-21.8184	17.7438	-9.84411	6.8796
	-93.5066	-69.1888	-23.5199	-21.8226	-18.5649	-4.0878
	-3.10104	43.972	2.58039	3.12647	-32.6905	-21.9132
	-4.28843	-29.2478	4.52357	5.0977	26.822	-1.67296
	96.4801	53.5196	44.5163	40.9154	40.7667	22.6766
	-49.4617	-19.4892	41.122	26.8518	39.667	36.0583
	68.7348	-10.3787	13.2086	19.704	50.1605	36.1785
	-2.58592	-8.8901	4.55372	6.23525	-9.21947	-3.72796
	107.079	17.9552	22.4683	23.7101	30.3789	30.162
	13.3355	-20.9783	10.1225	19.7966	-1.13719	0.160304
	-4.85394	-36.9344	-2.72445	-6.44123	32.7273	50.0776
	28.3179	36.9311	-35.517	-16.3064	-38.1108	-17.1896
	-29.2469	1.78541	-22.777	-29.7914	-7.80755	1.06785
	33.8984	43.8953	-5.4429	2.62726	-24.3259	-35.1369
	-104.674	-58.2814	29.082	7.87841	5.59666	4.36491
	-106.291	51.9321	55.2144	28.2098	29.4315	13.2984
	75.4787	-31.7992	28.5032	32.098	19.6848	24.6657
	-38.7893	30.4904	-3.89248	0.170579	-2.26939	-3.71521
	22.6129	19.5605	26.3137	13.5345	10.102	21.4049
	-57.9699	21.3616	36.7408	41.3165	14.9076	11.8982
	75.6047	1.0933	1.5733	-6.7569	59.7034	8.42862
	27.6893	-42.7285	6.4377	-25.9916	-11.466	11.3728
	-32.0298	23.5373	-33.0656	-29.8835	-35.71	-24.1879
	41.2189	-75.2717	-10.8027	4.47471	-29.1105	-45.3816
	2.40546	-31.065	-4.13356	2.09601	-8.07448	-47.8057
	26.244	-67.8287	-6.66429	17.9512	7.82998	-5.72378
	-19.8291	37.1934	6.17545	5.25707	-24.9141	-14.9305
	-15.2623	-40.2486	6.17321	-6.53255	35.4008	8.66646
	7.05119	-81.3644	12.9916	-29.0982	-2.89771	5.02679
	-44.303	80.8899	-35.7279	-32.8697	-25.0243	-16.2978
	18.214	85.426	-13.141	-8.41808	19.2367	-20.5177
	-42.8013	-5.72377	-3.02657	19.7149	-27.4669	12.2998
	0.88979	26.9524	10.2504	26.7308	-25.6811	34.6761
	8.0607	53.6643	12.7404	-8.93358	-21.8884	-27.0945
	-66.0177	-18.8489	-31.4765	-55.8267	-63.2619	-94.1149
	-14.9648	-15.7652	-21.6228	-1.34621	8.06593	-25.2318
	-47.9392	-44.9756	37.7249	21.5786	45.1811	12.3829
	59.453	-13.8949	-1.22529	3.18772	30.7738	41.9499
	-5.36121	77.2314	-11.4472	8.19908	35.1761	10.0274
	40.062	18.6616	12.7506	9.43435	0.0207037	-11.9642
	-44.2145	5.68788	-17.6161	-20.3666	-3.50754	-17.3845
	54.147	-74.644	-18.7465	-38.6231	-36.5242	29.0719
	45.1747	-15.0615	3.57192	20.0058	-0.542394	-19.4376
	4.49528	83.1534	27.807	27.9952	18.1768	57.4559
	41.3978	49.8221	44.5734	15.4317	48.0001	22.5464
	-101.847	-22.0167	-17.5008	-7.30258	20.9626	16.2153
	6.29221	-66.0969	-13.5953	-7.50074	-0.785472	-40.3707
	-69.6722	-49.7613	-23.2297	-17.8598	6.34649	-7.81482
	36.7262	10.607	-14.6536	-38.7075	38.8135	2.93798
	-19.0544	-59.3099	-57.036	-24.7543	-29.0165	-48.4595
	-13.5013	-0.257219	-13.2539	-13.0656	-30.1865	-35.926
	17.7431	1.56499	-24.3812	4.42014	-18.1625	29.6316
	51.2022	44.2101	11.8188	1.98432	30.0963	34.7432
	36.1002	-21.848	-21.9776	-1.24039	-30.5447	-15.3177
	-51.8233	-54.3541	6.81213	-24.3456	-36.8384	-45.8824
	46.4554	24.9203	3.28706	-8.63134	-36.3743	49.6799
	-48.0014	12.0976	4.38753	-11.2717	-33.9239	-13.7057
	30.0312	-13.734	-6.5795	-21.2527	4.00565	24.1926
	-12.3284	68.2992	-3.5887	-13.0807	-15.5682	-23.2886
	96.0546	47.4791	26.0886	44.4497	8.85203	47.1842
	87.6257	9.92434	10.0676	36.8861	41.4547	38.0219
	13.4864	26.7337	21.891	19.7897	58.9749	67.9119
	57.9318	-6.60572	10.6433	10.7567	-4.40245	2.6209
	-13.6094	-84.3827	16.9551	-13.9936	-21.2079	-17.8366
	4.48693	-31.4537	-6.33393	8.25962	50.2109	-13.4595
	79.0767	-1.68196	14.6494	37.4543	42.7311	-8.37283
	-64.5081	36.6117	30.0027	39.1427	0.503757	14.8131
	-6.14377	55.1693	52.7844	49.3854	81.1047	49.0676
	-33.858	51.9392	34.4105	30.8355	50.1872	76.2567
	-42.8345	10.9253	0.0113621	-18.1396	-43.597	-19.1604
	9.6332	43.1735	17.6986	20.0158	-5.41319	-18.7629
	-17.6335	-64.8457	5.98416	-9.44396	1.84702	5.58752
	-32.4644	-70.5306	-0.251769	-13.1289	-81.9672	-74.5524
	-47.8212	19.9117	-0.802563	27.1633	0.872081	4.41141
	38.1876	-74.6535	-23.071	-3.42036	26.6768	3.70891
	-86.5523	37.0847	-1.86322	-32.1686	41.1584	23.5039
	-36.9035	1.11256	-16.5317	2.58615	4.18765	25.3524
	-33.053	-1.99928	-18.3232	-16.2906	-28.7655	10.427
	33.6107	-22.0295	-18.6045	-12.0408	-26.2334	-17.4193
	4.44243	-4.77074	-15.1255	-27.3321	-5.52395	-37.1497
	23.5277	5.28705	0.232117	-17.2813	-44.8412	-39.3408
	-80.5098	7.21176	29.6552	-5.64784	4.30164	-4.26725
	22.4613	49.0266	-13.6384	2.22595	4.07752	4.61614
	58.4668	62.2589	-42.5834	-14.4656	-80.2184	-89.9899
	-43.2481	-31.1048	-24.1805	-0.164206	-66.9781	-26.4679
	95.9218	-14.9938	-4.01167	27.0285	-17.8568	-2.72365
	-107.146	-7.3145	27.1753	-2.09597	16.9099	17.3162
	-15.477	-60.7559	6.79478	17.9503	31.9415	17.6531
	15.4139	-46.6856	-26.7206	-25.7114	-31.1603	-66.1107
	12.144	-51.3023	-34.5915	-24.7459	-70.1733	-12.7952
	-85.5067	40.5344	19.5877	-15.1721	15.7002	4.37059
	-31.0181	-6.95441	22.4005	20.6081	43.4651	35.8356
	110.749	120.276	34.0524	26.7876	66.2153	72.1028
	44.4716	-12.9908	-0.693239	3.09828	24.7225	20.4704
	-39.1239	-28.8292	-2.81847	-16.7789	6.66795	13.0861
	69.3223	-42.0012	-39.6201	-15.5447	-37.2859	-54.3674
	-18.9186	71.3483	-32.9324	-19.4527	31.5409	15.3069
	-66.5037	4.91712	-24.768	-16.9965	30.491	27.6917
	-39.0983	-100.37	-27.1949	-40.9647	-26.6045	-17.3454
	-92.9206	-33.1889	-13.0435	-47.6206	-93.6276	-62.7003
	56.536	-45.8551	-20.8508	-1.39162	-19.2949	-11.1125
	-12.2333	-9.54421	-16.8348	-6.02159	-31.137	-56.0567
	2.17028	172.351	37.1382	40.9788	70.5891	52.2828
	80.6673	-10.7442	54.4842	47.3853	46.4663	38.7327
	-27.3444	-17.8936	-5.18478	-26.5034	-18.0374	-20.4389
	5.54936	-58.7936	-26.1333	-8.02545	-63.5505	-21.6653
	-5.25654	21.9805	-13.8193	-9.76744	46.1252	40.9869

## Sheet: C8
	Fig 2A: Left LGN	Fig 2A: Right LGN	Fig 2B: Right V5	Fig 2B: Left V5	Fig 2A: Right V1	Fig 2A: Left V1
395 data points	-29.6507	33.4837	18.6153	1.09356	-52.5546	-13.9638
790	47.2696	7.44219	68.865	21.9803	54.8414	10.3901
13.1667	-12.9543	32.6256	103.734	61.4832	-22.5798	-8.09997
395 vols	-95.9808	-125.797	-392.855	-179.58	3.46474	31.7328
	44.3554	-6.07579	155.803	-22.8639	-13.5918	-32.4427
	-5.77426	17.42	13.1444	84.1685	4.9938	30.4464
	66.6541	49.5128	-0.748199	31.2743	-38.4358	-47.045
	25.1949	-55.2939	15.4291	36.7885	5.97815	5.28341
	78.8965	12.3877	20.1153	8.5961	-44.1701	-5.72154
	-33.0807	5.76505	0.205128	19.4565	55.1208	91.0712
	17.0715	-38.8944	24.9852	10.7321	47.0576	47.3519
	-37.4339	-11.809	13.2109	1.29346	-18.044	48.6214
	-11.6794	-39.52	7.59472	10.0166	-0.326914	-7.32578
	-60.0661	23.8655	10.9945	-0.661021	-7.86993	-32.8991
	-27.7727	49.3958	21.411	12.8303	-1.94476	10.6666
	-11.4846	5.09448	-21.3904	-4.80545	7.84808	-11.0076
	55.0255	-49.7272	-27.4437	-26.7215	-62.0425	-59.213
	-29.4676	-23.211	-8.39477	3.84195	0.263135	-1.45039
	25.9104	84.752	4.75924	4.21728	-15.4388	24.1688
	46.5767	-8.70583	9.33062	18.2351	26.5464	-12.1853
	25.2529	-27.7323	-19.309	-8.0745	-32.0635	-42.2061
	11.5738	6.61959	-31.4337	-14.7332	-26.0265	-15.9886
	-57.4376	-34.3779	-1.31484	13.8203	-24.8778	-17.4118
	0.592111	-28.5267	-5.84437	-4.65777	-54.1673	-22.3229
	-20.1713	80.2368	2.14261	12.4354	41.6288	26.0324
	84.4788	8.94148	32.7091	28.0636	39.4816	22.0253
	55.6632	6.02443	15.5729	14.6918	-10.7296	14.1991
	56.8236	-0.871136	-15.8193	-5.35557	-0.135578	33.7823
	1.67744	-9.77691	-36.7569	-27.3956	-19.5693	-51.0064
	-82.6471	-45.945	-66.7214	-32.688	-124.827	-126.509
	-68.6956	-0.207205	-31.4304	-30.59	-9.82932	4.8415
	17.8768	-33.724	13.0595	-7.39693	15.5669	-24.9659
	40.8096	-74.1137	21.3465	27.7486	-53.3778	-41.3165
	-22.8186	-42.4229	23.6867	15.5569	-16.9289	-41.8089
	4.30921	-2.07996	31.5074	20.7851	55.0909	84.4373
	-14.8258	-33.4683	23.311	19.6885	-41.7456	-34.3917
	-24.4872	19.3677	-0.195008	0.197495	-36.5614	0.0392237
	32.212	9.75687	1.33782	-20.355	35.828	-0.791975
	28.7623	105.354	-24.2214	-9.80145	52.7402	52.5234
	-25.9888	20.8308	5.8965	12.4245	41.2962	89.4714
	21.7071	-7.35793	33.1112	5.08754	56.1568	16.2504
	39.1947	-40.1095	20.4673	1.1959	43.494	28.8271
	18.9525	-8.90549	7.14857	10.1114	61.0319	61.7609
	17.3458	-2.1437	18.7651	15.7118	-46.0414	10.6344
	1.94355	13.2471	25.2882	25.008	7.14248	3.23624
	3.99276	9.90833	15.1945	33.8361	9.90958	-15.6624
	47.8191	23.2891	20.8075	3.08386	-1.19056	23.8115
	-41.8558	70.4249	-27.4511	4.06804	3.72695	-20.4587
	30.4609	22.6465	-25.9583	-17.4429	-26.3909	-19.2019
	-6.95393	-13.4879	-10.6531	-23.6209	9.70857	-30.7467
	5.7793	1.02082	-25.266	-17.5267	3.29569	60.8482
	13.0101	-63.0708	18.4677	0.534718	-50.214	-15.046
	-46.5633	-6.02155	28.8784	13.9456	-26.9278	-30.274
	-10.8445	-20.6351	20.1932	21.4208	13.0076	-28.9458
	-12.2558	-8.89023	44.1713	30.1408	21.4801	69.7139
	-62.712	-21.2454	8.19273	-4.79888	-2.66438	-30.625
	12.6692	-56.2909	9.178	-4.13411	-19.7668	-23.9872
	27.7452	-76.4457	-22.2717	-2.01887	18.335	-0.531827
	29.551	23.5977	-4.52276	-27.7584	22.5296	-4.37111
	-10.0692	57.6276	5.43488	-16.0409	0.301178	-6.12542
	24.48	33.0328	-7.47965	14.3435	2.38246	28.9247
	-82.3148	-24.597	-1.23878	26.0649	-16.0368	-52.0181
	31.1651	1.94096	-55.066	-40.7902	26.8059	-10.5022
	-29.9172	-4.94948	-46.3927	-24.8659	-24.5087	-6.90053
	-23.4438	28.8494	1.00362	-29.7584	8.51889	5.83506
	-15.2399	54.5853	11.2933	0.393354	58.4719	33.6191
	-31.4369	-1.1283	-16.8607	-7.03851	19.5856	-5.39404
	25.1544	-48.2133	6.42712	-12.1659	21.8503	42.298
	8.60053	12.3094	-8.15559	-4.59496	-3.11666	3.54982
	-31.4048	37.0562	0.665088	4.6168	-12.5678	-13.5748
	-2.27959	17.7347	7.6149	-14.4218	-13.0285	-25.3912
	26.9666	-57.5713	-19.3889	-17.6029	0.111528	-6.22698
	32.5311	43.5985	-8.54771	10.0039	-57.2275	-47.9299
	-72.7379	-7.51376	-10.5171	-21.7389	-73.5697	-64.9859
	-13.3431	-11.3674	-30.922	-14.0341	-1.43454	-64.556
	0.851736	-49.7469	-15.5971	-8.67217	7.86877	8.19483
	44.7172	8.30247	-10.5385	-8.05258	-23.3704	-38.2178
	-54.8398	55.7373	17.1697	8.87911	3.238	37.5615
	65.2525	-5.53763	44.4826	12.5545	78.0625	72.749
	46.6677	42.8207	37.5616	40.9766	41.8981	56.7644
	4.98482	-26.1222	13.1107	28.3248	14.7015	4.82346
	26.3352	-2.96075	9.05814	-0.628484	-41.338	-42.2498
	16.3647	31.473	9.95247	28.9836	-15.2056	0.500291
	43.8328	-21.1215	9.66628	19.6861	35.6302	-6.38372
	86.925	47.1302	28.9165	26.7714	-22.1143	-12.9498
	-62.8496	-55.5684	-13.2759	-3.84418	-3.08615	-16.6414
	-1.67186	-6.46828	-25.2417	-1.98814	-30.9199	-19.7085
	-4.44355	1.39202	14.1431	15.8523	33.0977	33.419
	-31.9363	10.8697	51.1114	64.8298	48.4608	34.8033
	13.6108	-47.5993	49.2572	22.9013	22.9835	46.521
	-3.47813	48.9412	-21.5723	-16.6804	28.757	59.8358
	-16.0608	-12.139	16.5649	-8.24323	-2.05775	-37.3168
	42.6557	7.41923	-9.4058	-9.00819	-23.2458	-2.35795
	31.2683	45.0032	-4.49668	-26.9404	-47.9549	-16.7209
	33.7338	13.5076	-41.5647	-55.8989	-17.4343	12.1268
	-41.5084	2.35938	-39.7638	-19.7653	19.4738	11.4682
	-96.7836	-83.7387	20.2861	12.9558	-24.9247	-3.87067
	-71.8097	-51.9213	-17.3951	13.9642	24.6638	5.60879
	10.7609	5.25867	-33.2154	-18.8102	38.1659	19.4374
	3.18288	21.4878	-4.27175	-11.3155	-8.0903	10.6219
	22.6159	7.72968	9.43814	12.161	-12.6995	2.26709
	13.3523	7.79752	16.0992	-4.21024	-45.7224	-59.9866
	-20.1165	20.7692	4.47102	12.8144	-1.92446	2.67723
	-14.2741	38.0296	-28.3518	-18.8935	-14.638	-24.5448
	-17.961	-63.9309	-27.7506	-37.2518	-5.2972	-31.6074
	48.7091	-46.2248	-29.6657	-14.4696	8.10391	-1.25506
	-36.8395	26.039	-11.4789	3.00707	-21.2291	18.4543
	52.4118	-7.51133	9.59283	31.6053	38.4077	59.9905
	-44.755	24.4981	50.2701	4.99436	-9.17304	-71.7877
	-3.26625	-7.20901	1.09238	6.08378	-37.6195	-31.3988
	-8.74616	-10.8768	-24.1286	-5.02905	-8.01009	-29.6109
	-13.8292	16.7966	3.51375	-6.86217	-38.2136	-39.1204
	-15.7916	38.6546	-13.0164	-9.56788	-3.14438	-23.1156
	22.3132	-16.4056	15.3227	2.52718	18.0878	25.1282
	60.836	54.9391	23.8315	12.2171	5.93903	28.9015
	0.828906	43.0716	9.15927	0.663938	32.7773	24.2268
	5.72296	-4.04725	-5.77328	-1.29402	47.3381	17.0266
	-37.6517	-19.6087	-7.00704	7.30746	30.1299	14.189
	40.6004	-35.5382	-4.53129	12.2247	26.4587	-1.31455
	56.236	-2.18167	11.0863	2.4513	-28.8435	-20.3988
	43.325	5.89793	3.30899	-7.23212	-19.0885	-4.24872
	-23.87	-43.1233	-14.3412	-11.9439	-44.149	-31.4504
	-42.3162	-28.3628	-13.2798	5.21601	-32.0539	-19.3941
	0.459881	8.59235	5.29741	6.88694	45.2879	22.2222
	4.18944	-22.6431	14.4931	6.02237	-3.59673	-4.2498
	124.498	17.496	-33.6796	-23.2827	-65.1969	-34.8448
	31.4985	5.53914	-10.4987	-20.34	-33.6543	-18.2329
	11.0689	54.7668	-1.29014	10.1451	24.6036	31.229
	-30.2781	-30.7116	-1.45708	-4.33587	47.658	16.0819
	-16.7274	31.9393	18.2832	22.1202	-53.3518	-3.03282
	-52.5839	30.4748	-14.0729	1.37365	23.7424	-44.2356
	-36.9569	-8.12576	10.1754	-1.7571	40.2961	73.6707
	-15.3578	-50.3379	-20.7913	-18.7853	9.91318	-29.9235
	-62.2085	-87.1461	-7.62734	-0.359385	-48.8644	-53.9504
	-47.1096	-5.00381	8.80777	3.35323	0.555161	-14.4754
	-6.57944	-10.5329	21.9267	14.8886	14.1804	67.3217
	14.7196	-13.0066	-10.602	-17.6186	76.936	65.8545
	3.75986	-8.40137	-10.3973	1.10646	75.1123	18.2838
	51.5783	-69.494	5.37773	14.917	10.1571	41.1298
	2.12069	12.1776	-6.45396	3.36091	-5.61373	12.5293
	55.9499	55.0627	-32.8443	-20.3834	4.82274	37.6512
	-37.7028	21.8071	-17.2847	-21.426	2.86519	-6.21398
	-89.427	24.512	8.67197	-7.83987	-66.1995	-37.6315
	-32.3567	-1.12216	45.3484	28.2523	-8.88318	-48.6479
	-15.7232	63.0651	35.4284	17.2939	18.1931	29.3184
	-25.9529	48.4474	9.2242	7.08458	-12.52	-24.88
	43.7872	-45.5192	-1.5011	-8.76225	-6.77266	6.90342
	25.6733	-13.5633	5.51572	-1.38444	-13.0005	-36.2605
	77.3476	26.6817	12.6655	-6.22041	34.0424	36.0784
	24.8788	-8.21087	22.9331	7.51758	-38.9654	-10.2894
	-10.4734	-29.6935	-7.74995	-12.192	-83.505	-92.9913
	-17.6511	14.1682	-49.5018	-22.4353	26.9278	-45.8403
	-1.6641	29.4876	-3.71493	-20.9947	-6.05322	-22.1192
	-3.49329	-28.2066	17.4623	0.119971	7.03258	23.2679
	8.53505	40.4277	35.5989	30.0302	56.5664	56.2432
	25.5613	26.6022	25.1677	6.45515	16.5705	48.1988
	-56.6513	-41.518	-3.68454	11.2986	-18.335	-41.1464
	-9.32167	-29.5295	9.20924	19.124	-1.24436	20.6864
	0.4611	43.8166	53.6215	28.8874	25.4854	27.7757
	-7.05755	17.5819	-20.7315	-20.1724	-2.28615	-39.9871
	7.90413	-11.7012	-37.4068	-23.7119	-54.1085	-67.2057
	-98.8583	-17.872	-10.8751	-12.911	-31.5712	-19.8409
	13.0812	13.905	33.0877	9.99665	48.7297	3.65222
	-26.2248	-24.5599	33.9694	-0.224702	31.5046	19.3632
	-32.2549	-32.9466	5.19219	22.0469	102.076	94.3517
	35.053	-39.4702	-17.1709	18.3751	37.8256	80.5668
	-8.49655	-7.58631	-3.53801	-16.5061	-8.32017	-45.205
	-74.9532	79.8126	-46.9554	-26.7679	-55.7254	-24.8954
	44.6302	84.4949	-60.1087	-45.9238	-3.24528	-46.4288
	19.3489	47.9584	-18.5155	-9.11109	-7.60165	8.88806
	45.0477	-63.8732	1.49409	14.2713	-29.1448	-44.4008
	6.74123	-77.5789	1.08613	8.57539	-34.9081	-37.8124
	30.5988	-46.3178	-15.9023	-5.96932	-31.3177	12.0431
	-13.5956	7.46753	1.78226	3.22076	-14.8539	-1.83023
	10.8481	31.4372	24.6346	8.34866	36.6775	15.5333
	-19.1551	36.1319	49.3141	30.4445	40.2901	105.457
	67.1895	124.944	0.996172	15.9688	25.1442	56.392
	6.70547	-31.9901	-23.329	-8.29553	-40.8718	-52.9111
	-38.1689	-25.375	-25.9423	-28.7211	-39.0713	-25.6803
	-39.5087	-94.1991	-39.9021	-27.5187	7.97881	9.33234
	-45.185	-47.0316	-39.2013	-33.4913	3.05151	-19.933
	-25.7326	6.22417	-24.2686	-6.70614	-112.631	-90.9077
	14.078	22.0514	46.7258	20.5204	-21.686	4.77215
	58.7839	36.2892	10.4811	13.0158	21.3086	25.8831
	20.7451	-77.4236	-11.9309	7.5952	-19.9354	-43.6674
	53.9703	-28.0893	-6.3464	-32.398	45.3452	-5.67392
	60.6224	41.7977	-1.42456	11.9566	-3.41069	26.5842
	28.6452	25.4148	8.3746	19.1663	-36.4645	-14.8823
	16.0914	-9.71667	-1.73453	-5.64663	57.9884	49.7376
	-38.1483	-16.0706	1.3652	11.8277	20.342	15.8118
	6.33175	-61.565	17.3594	22.79	28.9927	9.51297
	-42.5769	-74.721	0.939927	1.40232	9.24514	37.3656
	24.3677	51.4815	24.2047	6.94053	52.5126	36.5601
	20.9378	52.8012	-0.915873	9.7815	-19.2481	5.84123
	3.71922	58.1567	-2.87776	-5.86532	-77.083	-79.4992
	49.6308	69.5184	-13.778	-10.9513	-72.061	-50.452
	-25.6403	-58.8557	11.239	-5.80243	-18.0054	-22.0246
	-13.2593	-35.9438	14.8977	2.36743	-20.7437	-27.5258
	-17.8454	3.12122	3.79678	-0.238498	-12.6769	-10.6799
	-26.6999	43.6742	3.85544	18.6531	-8.21536	-27.7973
	-52.8923	9.98937	18.8132	3.61322	-34.106	-22.1792
	-14.1644	2.89383	30.0703	16.7068	44.4339	66.9146
	26.6793	32.11	17.6597	-4.84815	55.5968	56.481
	-67.2563	54.1858	12.2889	-7.5965	2.54825	-11.4041
	68.322	-7.11153	-0.578732	-8.27709	68.8855	32.7486
	-30.9029	19.4193	10.4087	-0.849373	-23.5158	16.8618
	-28.9071	-55.7311	-6.64547	-9.98779	58.3515	15.1623
	-19.7365	13.5591	-20.8543	-26.9218	-40.3654	-48.1834
	26.2137	-29.5983	-47.7151	-27.0934	-40.4488	-51.9945
	48.8923	-29.2134	1.06048	26.59	43.1562	61.7467
	-73.2022	-18.692	7.16768	-1.0863	-16.0424	-32.6681
	-35.3305	-15.6159	-26.6305	-43.2644	34.7864	7.13207
	-45.4447	-2.60504	-8.15415	-6.45044	-10.5744	28.9843
	-0.704052	30.1855	-9.48996	-6.49401	-10.5202	-36.015
	16.1888	65.6325	39.7777	2.30355	-25.86	22.6955
	-8.95803	55.5965	31.1732	31.2543	-16.0944	-38.0597
	-15.8189	19.7583	0.372115	8.195	-2.63785	-38.6372
	51.5048	-65.1167	-25.2027	-14.4831	-26.0895	-13.3979
	-10.1626	-28.7194	-10.5208	-28.4314	-66.5098	-66.6963
	54.6115	-54.6167	-7.19833	10.1851	-13.778	35.1124
	-7.48316	1.55532	9.5371	6.49284	40.7801	23.2411
	29.4227	-40.2281	-1.88671	-7.92887	50.6782	28.5191
	-52.2244	28.6874	-11.9598	-9.74906	-40.5499	-30.475
	-28.1038	-6.41318	-2.20558	-6.95503	-10.106	-1.4307
	-17.2996	22.2053	-18.2873	5.73211	26.1121	60.061
	16.3538	-10.2686	10.628	7.8279	11.5914	14.3346
	-1.27253	-32.7887	34.9395	24.4451	60.6446	10.6583
	18.3429	-18.3454	5.2613	3.63609	3.63742	-13.0455
	-34.8599	-9.50616	-21.3891	-8.85811	39.8616	29.7552
	-14.4537	-18.5347	25.9454	17.2764	4.24457	-10.6678
	-15.1204	0.160045	21.5161	0.782827	-33.396	7.56562
	-7.54796	-9.83382	8.09205	19.8355	-4.83401	-38.0546
	61.8853	-33.762	8.35267	24.9612	39.643	48.0754
	-23.4997	53.5433	2.35551	-2.06369	-26.1666	-62.708
	26.3966	-25.5085	-30.6681	-17.1394	-24.0081	-43.2635
	39.6153	39.8485	-12.3766	-6.67923	-2.21155	-0.308047
	-29.8286	22.4549	-14.4225	-14.8446	42.8296	42.7649
	16.8614	28.4885	-2.61999	4.38048	34.101	22.8987
	-2.00045	27.5699	-17.4583	-7.26867	16.4695	-27.209
	-102.368	-17.0464	11.9249	14.9906	3.78763	23.7221
	43.5211	6.15953	57.3296	9.43248	45.643	82.3825
	50.6971	53.424	12.5853	-10.0331	55.1653	59.2369
	2.16331	7.66273	-6.91385	-14.8208	-4.13746	-3.77857
	-4.52552	56.4643	-1.55899	8.87588	-35.8279	-57.6165
	-15.6321	0.509644	-29.5235	-10.6767	-37.6838	-43.5371
	37.9449	-74.8017	-14.3207	-23.7798	-38.621	-70.956
	-38.9818	-20.6331	-12.3876	-7.89864	-22.3813	-53.6088
	41.1203	-20.53	-11.0179	4.09279	66.6241	60.1174
	-49.1905	-25.4064	23.6059	18.838	-18.7618	-41.2167
	-44.1358	-22.5483	22.5905	2.14256	-31.4473	-48.1287
	-42.0605	-97.3899	-14.3319	-23.6581	-50.7436	-27.1521
	-11.8963	-16.4887	6.08444	3.04612	-14.2957	16.0802
	46.2698	40.1529	36.1527	15.9268	36.878	68.5058
	-12.499	13.6062	33.4987	5.75202	-18.2346	2.99429
	55.4253	34.8865	-3.08967	9.00304	25.7532	20.1925
	39.6021	84.534	5.85804	15.6837	44.1957	39.5122
	-65.9453	-0.982682	-15.965	-3.7237	-0.868313	7.15832
	-13.0668	-9.2515	-30.1027	-12.6734	-23.6471	-6.76325
	18.5283	-23.2806	1.49108	-7.87683	36.1208	2.51144
	19.278	-15.7844	-17.4901	-7.56923	-31.3643	-6.47112
	-5.96955	-3.55755	-0.70026	6.43479	12.6788	17.8045
	69.9262	28.182	-31.5773	1.12954	0.929603	-3.04068
	-7.76922	13.1762	0.567208	24.4664	-12.9403	-36.8647
	-60.2714	29.782	-18.9051	-12.4442	-61.4621	-49.0819
	-34.9146	-25.4825	0.0890064	-22.6147	39.2444	50.3929
	12.5885	-75.8811	12.463	-3.9089	-13.5928	-13.7826
	-11.9485	-18.2921	-3.09361	-11.9708	37.9619	52.2528
	80.2024	-2.42161	-4.13075	-8.87298	49.963	42.3274
	31.8045	70.8251	-26.2263	-12.2593	-59.072	-46.6094
	-42.4547	-35.7308	-42.3384	-15.738	-71.94	-73.5162
	-33.0003	-2.7608	-31.095	-21.9732	-45.1927	-56.0036
	-43.4334	63.6347	-18.8213	-14.397	-0.109904	20.5062
	9.73744	4.47693	10.1303	2.80874	5.40734	13.7625
	26.6843	32.4378	26.4371	41.3709	52.6482	67.5727
	26.4165	16.1624	43.903	32.8394	-3.49148	18.8581
	-14.6775	-10.2627	27.4872	3.68209	-4.21574	-33.976
	49.5237	-44.3364	1.05786	20.4025	11.9996	4.96096
	12.4306	70.7374	-0.0789649	22.9471	42.1866	31.4358
	47.2453	89.6254	16.2099	-9.5203	10.6479	0.879938
	10.0198	-25.2714	-4.90938	-23.0339	17.9064	15.374
	47.9203	38.9534	-28.6653	-5.26712	-71.1554	-55.293
	-43.2964	-57.7396	-14.0965	8.84843	21.891	4.20369
	32.0666	22.9613	-14.7959	-0.810578	36.6094	51.4955
	-1.59809	-26.0509	-19.6653	13.7837	-28.684	-51.9891
	-53.741	7.12238	-2.60513	-25.1203	-20.2415	-22.8313
	-65.6766	-75.2946	11.9525	-6.56372	-65.0706	-53.6178
	3.34177	-47.1855	27.5633	2.89289	-69.5785	-49.2087
	6.56462	-5.62628	38.7979	23.5707	1.06606	-2.01199
	37.0193	13.3825	63.2912	23.137	-22.5169	17.3031
	15.6106	83.6546	-12.3993	0.0689799	8.61994	41.6336
	7.55144	49.2095	-7.78715	-12.2848	89.4792	62.5273
	33.1134	24.312	-11.3753	-0.636354	47.4359	71.5124
	-59.9286	-76.3763	-6.8473	-11.6765	-41.7305	-46.3646
	-20.5788	16.6605	-3.74415	2.33286	6.09917	-7.07031
	-38.0091	18.365	32.0394	5.31746	46.5903	67.2594
	-20.9637	-49.5034	25.3544	19.0275	44.0538	10.676
	44.2102	-9.6439	31.5392	16.7419	7.84806	8.14086
	-67.2258	-22.913	3.04233	-0.652664	-25.7983	10.3816
	-23.7733	-65.635	-17.2065	0.176523	-25.7746	-22.5737
	41.0173	39.01	5.72763	-1.4422	55.6763	30.637
	30.3301	57.1336	27.4223	9.5885	-39.4149	-62.5279
	-51.9696	37.9254	-28.4874	-14.907	-50.5969	-26.9102
	44.7719	24.0916	-78.8317	-46.6282	-26.3374	-23.2934
	63.1214	-34.5489	-27.1709	-11.0302	62.1455	16.9497
	-17.0776	-14.6902	18.5403	19.758	-6.6348	-0.744066
	-49.4075	-23.9035	-19.3781	2.7389	-24.3064	-43.6324
	-41.0892	-9.99159	-9.31156	-9.89071	6.07365	2.85435
	-23.5676	-21.334	-22.1953	-8.70575	6.85212	-16.0832
	-40.4311	-36.5803	-0.914675	-10.631	15.4908	13.15
	7.3829	-26.9852	0.987215	-3.10032	-9.63898	2.06605
	18.3877	-7.26983	1.20698	14.7833	-80.2211	-80.4391
	19.6751	11.6996	17.6642	14.2408	-21.99	-22.0052
	12.6601	-35.083	-23.5968	-15.5257	23.4359	31.7229
	-33.8996	18.3796	7.51347	9.00004	30.7661	59.8325
	-22.9114	10.5396	6.26763	14.4968	51.3087	40.6624
	-37.0362	-45.5347	10.6731	-11.5797	-0.620497	-52.2035
	38.3692	18.5836	-29.0152	-28.7092	-52.9468	-25.019
	-7.20575	-16.024	-13.6813	-11.2507	-14.9751	-29.5063
	-2.52364	100.565	-13.0276	-15.1792	-3.81895	1.11499
	20.4538	-27.9072	19.287	-7.26563	36.6766	18.8366
	-57.0038	-42.9591	-27.1575	-6.02115	-5.28003	-12.1008
	-26.4591	-47.846	-6.4057	-11.7556	-15.6975	-38.0429
	22.9898	-16.6035	6.31012	-15.5724	2.49982	2.83544
	18.336	27.9097	17.5685	-4.47049	44.2171	70.1409
	29.5009	-22.5244	9.25873	22.5834	64.9426	69.2238
	-16.7416	47.7532	9.52356	4.52384	58.5381	18.1365
	39.0641	53.6158	29.8264	19.0967	0.871774	19.0247
	20.6998	51.4166	-4.70093	9.47996	-26.2769	-14.212
	29.1079	-13.9695	-31.2856	-4.52586	-26.1428	-59.1812
	46.2443	5.55133	-7.52132	-6.82377	17.4777	-20.2152
	20.8757	-21.1579	6.27629	6.03118	-12.2218	53.9949
	9.4526	-16.5209	37.3214	-1.36163	54.8322	-19.5801
	8.94166	-13.323	10.3272	16.3315	4.12378	-19.3229
	22.3689	11.1291	28.8124	40.9989	6.39872	45.4162
	-22.5508	-15.9602	-7.55544	-0.476616	-36.8088	-55.2892
	-17.5153	14.5226	-14.2823	-30.577	-37.5213	-46.8619
	6.2455	-12.361	-4.4675	-22.7679	5.93606	-20.5804
	18.066	-36.9162	7.73161	-1.48991	67.1011	51.6039
	58.0263	12.6565	15.0304	20.1921	-22.2114	23.7332
	-59.7569	-21.0442	-11.8139	10.6559	-9.50896	-61.8423
	-53.9838	106.276	-3.38018	-8.27405	29.8451	71.1841
	59.4679	-7.36416	-7.69337	-0.529944	-7.44229	47.8433
	-25.6673	50.3388	22.0542	4.25449	40.0992	-8.94237
	-54.8651	-8.53731	7.47301	14.4272	-27.571	-42.7213
	-61.4339	1.24391	16.7026	21.466	-56.541	-3.92441
	40.7034	15.0829	-11.3737	-16.7577	-31.8923	-26.8086
	21.138	-75.1633	-67.3619	-26.7464	-50.4825	-30.1166
	16.1116	27.5295	-1.8203	-5.77978	-56.6278	-39.4753
	-5.70945	-24.2739	12.1889	-1.37415	-4.96564	-44.4505
	-32.1586	-48.0554	42.4469	24.1857	-30.5921	-51.849
	4.16309	-48.9875	20.189	12.4992	25.8502	10.677
	-22.7621	11.8127	19.3002	11.3719	-31.1283	-6.21561
	-27.4376	-13.216	-9.91579	-2.51383	-47.8495	-34.8797
	-23.6229	-47.3866	-31.7824	-9.64718	-46.0943	-34.7757
	31.496	-14.598	-40.2476	-36.1493	5.53711	-34.9158
	-28.3568	50.0872	10.3094	-3.7878	-27.6409	36.3436
	-49.68	21.8973	-6.34166	14.8424	-13.8562	-35.7233
	-42.2416	57.6423	45.9676	22.5519	-3.13422	70.2963
	64.0309	-0.136827	45.9004	16.7028	47.8235	3.44048
	5.39658	-13.8694	7.92196	-6.51161	44.2489	33.253
	71.3354	0.362068	-1.72476	12.6006	8.14928	30.8793
	-56.154	17.8863	-6.90884	-8.33842	25.9361	12.6322
	-18.2823	-35.4029	-22.7061	-23.7178	-17.2379	-32.9779
	15.4364	-20.7453	-22.2671	-10.9073	-7.94063	0.330325
	-54.3239	5.77921	-16.953	-5.44729	44.2719	41.5953
	14.7427	59.9366	14.5871	30.5547	72.361	96.1896
	33.1138	-18.4479	40.7199	18.7808	103.079	95.155
	-35.3621	0.843502	16.1814	3.58727	10.458	-1.06412
	-12.1557	85.7984	-17.6703	-21.2755	2.0986	27.8572
	20.1178	-21.3842	-24.3004	9.77548	13.141	-12.902
	40.7848	31.7264	-4.97194	-23.5509	-8.21088	-1.1871
	56.355	-34.1209	-29.3583	-23.2436	36.7029	39.538
	28.271	-24.9087	-16.0882	-4.50477	-20.003	1.38373
	-96.8797	59.8463	8.27407	-9.73694	-36.782	-48.9064
	2.0969	53.3037	-5.99023	-5.03981	-26.8812	-42.2606
	14.6645	-17.8258	-2.48991	-25.3641	-34.3978	-49.3048
	40.6243	-26.3358	-43.904	-23.3212	-10.1265	-20.5944
	-56.8636	-59.7476	-17.2179	-6.90562	-0.508529	17.2332
	79.0874	-27.0294	3.0429	22.5436	50.5899	53.354
	31.2872	25.4034	-0.907759	10.6853	57.4286	40.791
	-8.54519	24.2273	-9.95996	-12.0847	-21.7524	-1.9369
	-3.07354	-13.7108	1.14787	-0.381863	2.13464	14.2755
	-14.6914	27.5558	-24.8649	-6.66281	14.7457	-14.8324
	1.44612	-28.3424	36.0249	14.2177	36.8083	56.196
	-9.40569	104.115	31.2008	36.6971	44.2065	78.1467
	17.1281	-24.9254	17.1661	31.9703	-19.2916	11.6988
	63.3166	12.4378	0.572666	2.05689	22.0171	32.9152
	-9.84203	-5.79775	-8.83723	-4.62803	-27.6601	-39.3034
	-39.3241	17.0869	-13.1357	-26.3477	-37.9411	-31.6019
	14.9286	-21.822	-28.3127	-41.5029	41.8255	25.3014
	-6.8529	-68.8482	-12.6806	5.23596	-13.6998	-16.7074
	32.2783	10.8676	16.1367	6.57533	-11.8961	28.9357
	-45.6126	65.5273	31.0198	6.16671	-34.0556	-19.1225
	22.057	38.6764	3.52552	25.8507	13.8556	21.7049
	-7.37245	-49.3856	-16.4773	-9.85883	31.9598	10.5926

## Sheet: P1
Blind RHF	Fig 2A: Right LGN	Fig 2B: Right V5	Fig 2B: Left V5	Fig 2A: Right V1
525 data points	15.0632	-286.407	-42.4833	17.6304
1050	-40.0977	-118.613	-46.8386	-167.77
17.5	-103.52	155.849	4.47419	8.27201
525 vols	76.1052	222.467	81.685	84.1499
	57.4299	90.7096	50.4613	71.012
	0.371726	51.5232	69.7208	62.8671
	72.628	128.553	80.8392	41.206
	47.9299	124.584	54.9805	20.6979
	-39.518	53.7715	-12.0287	-38.6215
	-119.138	-14.6466	32.8275	42.1657
	-113.67	-45.8279	33.2052	-21.6015
	1.40858	232.498	43.6782	200.784
	44.4235	137.804	32.5458	123.363
	29.8913	107.272	53.9531	76.7823
	121.087	52.0483	52.7472	66.892
	34.2947	32.2783	84.3453	78.3753
	-7.50582	80.8758	20.8017	6.7725
	-41.9355	-22.5894	-78.7429	-59.9182
	-21.8222	-42.2494	-80.8067	-86.2937
	6.50341	-72.5461	-90.7805	-55.2377
	-23.7873	-54.007	-76.7102	-121.098
	-68.0429	-144.553	-216.556	-288.07
	-134.951	67.8297	-20.468	100.18
	33.9794	-49.5612	36.0596	38.4437
	-247.909	-302.49	-222.233	6.19758
	32.5132	134.07	30.7478	39.9187
	16.1466	17.7485	96.621	51.1585
	11.352	26.2943	37.0315	28.2816
	-46.6572	-172.848	-92.7276	-52.808
	-6.7282	30.2032	15.935	-58.0026
	49.8726	53.0846	-21.4689	-22.452
	-19.9753	-14.3533	38.0985	1.95165
	30.0541	-368.684	-258.64	-376.996
	73.993	158.832	173.527	30.985
	60.893	-27.9167	29.5714	33.7746
	-46.4237	123.274	155.557	85.2743
	149.581	58.3475	131.332	125.359
	77.0001	128.917	83.1674	66.4331
	67.0369	147.983	106.366	147.639
	116.207	31.8668	66.4139	110.795
	38.4905	102.58	45.1392	90.2959
	-31.6879	23.4003	-21.3323	59.2614
	67.6948	45.5917	24.3063	74.9441
	13.7316	7.65536	41.5364	59.8833
	101.124	47.2591	18.4954	91.7082
	28.4136	102.666	24.1836	62.0228
	104.89	77.4475	-11.5243	71.6137
	-32.3276	-268.193	-55.28	-162.439
	-157.44	67.8576	66.1918	-32.1058
	47.7652	76.8861	-17.6395	-25.9309
	-31.5293	-43.9091	-64.6901	-98.267
	-48.4325	-99.5692	-30.3229	-19.2144
	-237.461	-110.428	-51.8846	13.8212
	7.58856	-15.7129	-73.4972	-24.689
	22.8654	0.612422	-5.49976	-31.829
	-74.0358	-108.315	-41.6389	-74.0939
	-68.6525	5.71256	42.4698	-44.6908
	55.7282	128.065	84.7293	49.2722
	53.592	96.0383	14.6694	-19.7487
	-20.9881	51.1229	80.0846	29.5957
	-59.3492	-191.167	-101.772	-249.087
	-84.1818	31.8358	-50.367	-110.429
	81.9187	148.19	85.015	89.3138
	-39.0302	-23.1393	-6.531	0.0779553
	73.5545	82.7868	74.5668	88.5795
	-49.0484	106.808	46.6868	96.6289
	56.0308	166.956	35.8863	104.418
	-50.4171	1.166	44.4093	58.6413
	7.62532	-0.840479	13.2501	-38.9143
	-43.0353	-319.761	-150.1	-125.578
	15.9605	-122.443	-160.839	-46.2919
	118.156	22.9491	-2.56561	5.35581
	-96.0592	-87.6692	-37.9275	-89.6937
	55.4039	-58.8206	-9.16571	-77.1975
	85.9358	-75.9925	-22.2449	-115.549
	92.6392	-13.8315	21.4264	-33.551
	-39.5884	-261.461	-172.25	-288.432
	-5.09325	-1.73534	140.277	-41.1164
	51.8871	64.5887	-23.1013	99.2617
	-151.612	115.88	-55.3428	-22.643
	72.5798	25.9415	-174.528	4.83288
	99.5848	197.667	78.2302	217.821
	46.196	25.2915	-6.17794	-4.42782
	-99.9402	-80.0065	-12.6191	-30.4042
	-34.0133	-80.1167	16.6115	5.27311
	67.7887	-33.3245	10.3205	-23.5473
	-72.356	-52.4438	-34.5434	-23.457
	-90.9122	-125.678	-31.7346	-110.705
	-18.8282	-38.0078	15.4012	2.48115
	69.8928	38.034	33.0362	56.0451
	-111.879	55.5362	-53.9566	48.1721
	61.9891	-3.5021	-43.5012	-38.971
	-9.75855	23.4393	34.0574	23.4547
	-15.2985	49.0196	85.6898	179.492
	22.9049	2.16189	155.19	84.7098
	35.4137	-71.6197	123.768	34.9317
	79.98	28.3841	181.936	178.759
	56.3358	12.8653	75.4749	134.036
	31.6299	-20.6457	54.6287	31.039
	61.3901	35.7873	79.8904	-3.44777
	-86.8871	-590.044	-692.739	-1041.04
	-7.31911	451.917	351.496	480.883
	-9.07132	25.734	-123.508	-28.7577
	-14.5798	124.072	-32.3424	93.4597
	-38.8933	94.9218	55.4474	53.7361
	112.971	66.1456	-23.3164	117.936
	22.2371	20.2717	74.3045	56.844
	-3.09056	-9.8288	1.83982	76.1046
	63.0466	-19.0306	58.2921	69.2076
	-82.9811	-45.5713	0.268357	73.5815
	-73.9177	-9.89037	9.65469	80.69
	-23.8148	29.8386	-17.6696	105.883
	-10.2072	31.1979	83.2214	91.8494
	-25.7305	-102.851	-4.40096	100.196
	60.1127	-220.599	-241.347	-188.202
	-34.9467	283.705	111.586	312.984
	46.6239	117.674	57.9307	122.953
	-60.9589	-72.1982	9.80047	-42.4298
	3.15003	-306.587	-322.181	-574.4
	99.5634	213.709	35.1484	17.3237
	119.847	106.323	69.4305	-1.72545
	-113.209	-25.2632	15.5864	-80.7972
	35.8246	142.043	27.4388	-18.883
	152.763	267.561	88.6659	170.658
	-47.1051	19.7036	3.6039	-46.0805
	10.5222	-71.0371	8.68758	86.6194
	26.3999	12.5044	15.7478	64.6694
	-256.949	-268.446	-298.623	-100.247
	18.0833	-43.9102	-44.7836	-24.6627
	-10.628	-112.383	25.4215	19.8642
	24.7254	-19.892	52.3312	-34.0134
	12.9883	17.0206	82.9079	26.9374
	24.7316	-40.1534	60.3434	-15.8389
	2.17183	-76.4762	55.597	-24.3331
	-4.49641	-222.574	-96.1298	-168.407
	-390.904	-69.44	-36.4005	-377.649
	103.998	-57.3921	-221.963	-55.4222
	57.9619	103.084	24.7511	227.558
	31.8985	29.8242	-9.50116	116.735
	110.476	12.03	-57.8251	-31.4076
	89.2297	115.26	54.1302	95.1679
	-149.977	-95.2647	8.41337	-16.967
	34.3012	55.2096	4.97375	-35.7335
	29.3827	46.6665	51.256	32.2778
	-153.179	-71.0739	51.7487	-20.6705
	27.6228	-2.84072	53.9814	-36.2128
	31.272	124.129	101.451	20.8981
	49.5382	127.089	137.28	26.6904
	-191.976	-73.5305	83.9992	-15.1224
	48.6294	34.3524	71.7394	21.3257
	157.707	76.2767	50.5145	88.2592
	81.188	76.523	29.9217	67.4295
	-7.33991	-140.532	-42.4701	-129.37
	-121.569	42.6178	8.00674	-48.9315
	43.5085	-90.9044	-43.1212	164.152
	109.116	87.1194	112.527	200.122
	30.4894	54.26	51.2645	80.1231
	-195.877	-86.518	-81.8998	-30.7243
	-22.0199	34.3672	155.972	52.7308
	38.6016	12.1854	21.523	14.4234
	21.0785	64.2222	33.5592	11.9915
	20.3377	235.2	6.66879	63.4033
	29.3801	39.8594	4.65	-30.6654
	-38.3047	-273.011	-273.289	-336.28
	-220.547	-527.607	-631.368	-946.553
	39.9992	280.689	110.7	538.116
	306.971	103.743	-107.653	15.0938
	102.623	27.6771	-16.067	25.0233
	-188.896	-220.914	-100.583	-72.2405
	-25.7993	-130.537	-60.7606	-152.98
	7.64773	182.875	219.154	19.5113
	101.614	159.354	172.212	38.0915
	-203.553	71.1933	61.2243	-15.4562
	17.6267	35.8495	91.2491	13.5978
	-7.01958	85.2275	60.8008	55.6508
	0.00720631	18.359	59.9638	73.0977
	105.432	64.2583	75.2153	28.2581
	-259.136	70.2928	102.426	-85.3685
	-105.852	-170.77	-345.535	-517.518
	177.167	16.7235	-27.7047	461.508
	7.39546	69.6537	84.174	228.671
	37.029	103.968	108.951	156.221
	-23.8385	109.486	85.7651	191.559
	4.84895	-59.0894	6.87536	92.0628
	8.22901	-537.446	-101.624	-106.681
	-112.295	174.426	80.2581	178.513
	61.9923	28.0486	51.6141	55.4586
	55.3355	-435.595	-289.379	-174.045
	59.6189	195.208	-28.7718	8.01569
	22.5133	-22.8523	41.1671	92.2992
	64.1719	4.75611	60.1395	3.0917
	84.7949	116.482	32.8105	118.338
	-79.4547	-111.546	33.4694	-57.6365
	18.2721	7.32599	82.3254	-124.049
	179.086	107.241	127.376	72.9293
	120.366	88.0938	76.6722	52.671
	-69.561	-6.1549	-274.374	-169.255
	-102.517	-533.862	-274.541	-595.38
	-243.432	-501.099	-639.358	-1003.55
	-135.081	235.329	242.556	579.382
	56.5405	68.9683	38.9465	61.952
	-121.212	-86.3529	-52.1661	-53.3123
	120.577	150.763	120.146	20.8631
	15.6888	51.457	33.7881	-80.6678
	-80.5659	-36.2848	178.461	-65.708
	20.8379	-41.347	95.7203	41.5949
	-139.002	25.4577	110.547	42.6875
	78.8472	86.2892	89.9522	26.6336
	7.4756	80.782	-13.7137	-82.0298
	14.5541	70.4169	-2.83216	-51.6662
	92.8197	91.8741	15.751	95.8063
	26.0302	-1.30488	20.1595	48.4156
	15.688	-14.0091	-2.12835	84.3393
	148.391	4.33803	-10.9744	-40.667
	-127.379	-25.0665	-35.9401	62.7543
	28.1079	29.6229	16.8415	195.388
	75.3916	-49.8902	-53.1105	100.796
	-5.39312	26.6048	122.263	112.794
	43.1964	22.9629	21.8089	29.5774
	31.9272	45.373	70.6813	6.53271
	-50.4054	79.8573	72.3862	118.289
	97.1509	23.1007	10.1864	24.8182
	2.74884	-54.4404	-0.330565	0.90072
	-94.1546	-82.6163	14.9817	0.212654
	-48.457	-15.6707	-85.67	51.075
	48.1176	66.9015	203.328	138.613
	-110.786	-105.873	-45.0926	-9.66622
	97.2758	172.199	-167.656	-172.984
	-152.274	-43.5727	-92.8302	-42.3569
	92.8578	156.341	-120.444	65.5365
	76.4456	-5.24162	-80.4673	-11.0226
	-0.0465525	3.28245	-41.0734	57.4885
	29.7512	14.8694	-29.6932	-53.6229
	22.0139	0.354802	13.4318	-85.4117
	-78.4657	-84.3839	-28.2123	-131.071
	35.0211	21.8703	18.8058	-44.7628
	109.084	48.779	88.2073	63.0883
	20.0662	-21.513	72.1921	-4.69628
	51.9351	-49.2143	61.3521	-128.89
	88.6093	-26.2511	-83.5375	-8.79601
	-123.885	105.9	47.55	62.584
	107.885	-1.58853	142.272	182.301
	36.2043	77.9241	82.6063	144.581
	21.4132	21.6349	38.0368	8.34335
	-108.993	72.5619	42.357	53.2372
	-105.315	-64.6462	-87.799	-19.0959
	-0.654393	-110.214	9.59404	-58.902
	63.5407	23.724	72.0034	-13.3237
	-21.7144	-76.8647	32.8434	-184.098
	31.1692	193.791	80.8627	225.86
	112.2	182.463	121.524	155.111
	2.37989	-26.9423	104.371	21.7624
	-32.9174	152.207	221.617	177.803
	-238.955	130.067	145.141	128.049
	61.3463	-467.186	-411.036	-568.874
	103.315	-616.916	-1436.28	-616.212
	-529.109	-505.918	-277.836	-148.6
	-7.80777	6.38317	514.873	6.20554
	66.7314	109.43	92.6024	220.431
	-89.7979	15.5274	12.7445	-74.2517
	103.516	184.583	154.507	193.976
	65.2717	95.5453	185.446	131.098
	-246.862	165.757	-23.8879	-148.483
	44.6966	51.2491	182.638	266.658
	134.754	162.542	154.48	235.352
	27.5063	176.82	31.816	59.2546
	-16.43	-17.8011	-24.3165	-120.201
	52.9835	-47.4688	29.0515	-88.8892
	87.8411	-81.1055	-58.7461	-22.4428
	-12.5114	114.658	172.751	80.0963
	-53.939	33.6787	-157.536	-187.442
	-28.2397	20.8671	118.508	42.0326
	6.33767	117.049	203.118	127.423
	-33.4379	-120.936	-104.331	-70.1465
	-4.71483	-35.5604	46.1547	-38.045
	-8.15097	-183.033	-68.4179	94.8621
	-22.0209	129.167	-265.864	93.8052
	119.438	97.7806	2.49311	332.232
	14.7734	-57.4821	-29.491	20.8096
	52.994	53.0751	94.568	105.317
	48.495	11.3028	30.9233	-27.0288
	-37.35	-111.69	75.2701	67.6789
	39.8552	-281.298	-1056.95	-814.469
	110.519	37.282	224.146	99.1617
	102.679	59.9315	205.384	90.8759
	10.8796	49.8516	-29.889	35.3793
	38.0175	125.938	184.398	141.362
	64.6033	172.76	126.534	126.168
	107.654	153.544	134.759	63.6137
	45.0481	141.097	59.9649	41.6026
	-7.04533	-453.414	-249.881	-360.212
	-119.612	-553.926	-281.765	-404.366
	-119.863	353.964	376.351	546.433
	-4.11693	55.5782	19.9258	-36.3872
	106.64	85.5195	39.1087	149.318
	7.44394	108.068	111.602	109.417
	46.7768	-161.575	102.376	36.0602
	-18.2268	-158.779	-66.0349	-6.48695
	-35.0786	-162.832	-430.497	-774.028
	-331.605	-507.754	-577.003	-298.543
	41.1	463.079	560.797	180.147
	61.8995	107.861	156.654	11.2919
	7.97909	103.814	84.2839	-1.01027
	5.13019	152.939	123.654	37.6614
	59.6849	87.4639	-1.62456	-45.8231
	-41.1508	-270.937	-183.062	-191.54
	-83.38	-27.5977	36.3685	-55.5943
	20.8227	166.081	21.2082	197.743
	-79.8187	-30.1071	45.9356	80.1301
	6.62944	-4.98207	-54.8057	0.486973
	-0.945638	56.9436	66.9113	4.37657
	-18.9895	143.565	205.211	211.391
	45.5848	-109.669	-473.012	-66.8508
	20.9143	-28.6786	38.2978	-140.284
	47.1792	-1.86729	108.992	88.8543
	-82.4844	4.29204	83.1663	123.062
	-14.6443	-21.7558	-1.77336	57.4175
	-218.542	49.7246	38.6538	17.8284
	7.78875	-72.8405	-22.3687	-25.0723
	37.6488	105.582	121.194	188.859
	39.8789	-344.662	-41.285	-345.643
	-10.7067	317.218	220.682	175.934
	-10.8083	-12.654	-29.6768	-99.4106
	47.9111	65.9262	154.401	90.6505
	40.0476	61.2913	147.165	-5.40596
	71.5568	133.656	176.311	122.699
	64.6398	-74.499	-271.921	-48.1058
	-66.2522	-30.8031	-205.696	346.493
	10.4376	405.87	-1.92445	471.917
	-101.904	177.977	38.5251	336.521
	-136.896	-197.231	-81.0213	-63.265
	-9.2271	-231.369	-358.82	-323.462
	79.5086	-571.132	-329.594	-438.173
	184.757	-7.08587	-14.9289	-159.229
	109.959	77.3517	92.062	-70.4621
	9.4267	71.1181	86.3763	-178.005
	74.9543	49.6248	44.8163	-51.4389
	30.6246	-232.648	-241.122	-260.054
	-192.42	72.4248	-67.6274	134.898
	-4.37364	48.3371	-44.5893	-35.2567
	-101.949	40.0367	-3.75787	20.379
	-44.8976	44.3978	98.7096	53.3101
	-11.2696	-7.89949	126.173	85.8118
	116.316	246.531	254.665	255.505
	-56.2058	-172.259	57.1146	29.0792
	48.0689	-44.1252	2.65499	-94.9679
	71.8015	39.5318	139.923	24.7433
	100.012	54.1289	-24.0038	-195.247
	-156.275	131.319	189.536	209.769
	-18.8885	97.736	56.1439	73.6176
	-77.5059	-6.66559	4.57353	21.5721
	104.893	207.429	100.541	123.775
	189.795	70.1456	102.435	152.007
	109.286	164.798	109.4	153.598
	109.407	62.5507	41.4927	1.39605
	123.239	-40.9667	53.2093	-134.03
	95.9119	87.18	163.326	1.24504
	-71.3847	-427.8	-537.44	-423.637
	14.8286	491.484	306.844	535.701
	85.4108	323.512	98.7901	228.471
	-232.441	-912.389	-815.959	-647.984
	-113.543	499.617	429.593	346.013
	57.5901	362.964	218.716	268.201
	-34.0713	196.206	161.981	196.919
	-137.995	-1062.26	-823.794	-844.817
	-60.126	199.123	311.445	229.017
	-348.805	-1505.95	-726.709	-532.998
	-56.7076	169.911	-79.4574	-411.752
	75.1463	334.388	153.792	369.386
	-65.2006	-81.8631	-11.3793	-139.765
	22.86	15.9646	114.718	16.8493
	151.903	14.1839	85.2386	61.4631
	-61.0318	26.3705	39.9395	54.5553
	-168.413	-124.237	-198.384	-265.44
	88.5009	201.97	163.432	238.78
	79.6563	117.378	99.7329	96.8446
	25.8239	-92.4352	76.4464	-103.03
	153.505	191.262	160.797	116.172
	119.028	115.046	174.479	172.472
	221.219	42.254	118.212	111.679
	239.317	92.2841	32.9505	-54.2145
	106.618	319.733	306.968	200.992
	-19.145	159.248	164.148	188.74
	222.995	198.5	53.659	-102.324
	-27.263	107.681	139.908	138.665
	177.738	317.013	47.9986	162.388
	-113.639	-16.407	224.093	163.375
	-255.715	-181.63	-129.087	-89.515
	-5.19818	102.487	16.5835	42.7611
	-78.1249	-34.9857	-142.373	-82.1557
	214.387	-18.1447	-41.8278	-108.27
	-121.228	-523.179	-400.355	-329.993
	-36.5614	101.56	24.4417	29.7178
	-23.6411	-36.6773	-184.85	-350.77
	-121.437	-31.6719	-66.5014	25.2357
	-31.8099	-14.04	-52.2843	-39.6268
	-38.36	-29.1578	11.9153	24.2088
	-29.6931	6.70679	38.9214	38.8536
	-44.6432	46.3087	64.768	95.4443
	-67.8059	-112.57	-79.0159	-32.6699
	-125.699	-293.559	-568.255	-434.313
	0.237294	-20.9836	169.482	160.116
	-20.5631	-144.347	12.5834	-19.3384
	-97.8669	-109.814	-24.1528	-23.2473
	-14.4737	-63.7411	-56.9198	-30.5633
	-271.785	-70.3688	-256.284	-186.021
	35.1425	-96.9306	53.5617	89.8965
	-70.1371	-216.932	-105.342	-120.671
	72.539	57.8794	55.0609	120.957
	37.447	89.0566	75.2882	183.403
	33.8277	-22.0972	137.653	105.479
	-111.284	-36.88	-472.671	-167.095
	99.8492	191.177	231.312	224.207
	-65.1386	165.082	227.776	146.865
	56.7995	97.7011	182.643	64.6037
	49.0373	122.892	183.7	60.1213
	16.8384	99.6208	150.648	64.2684
	-10.5193	70.6421	-52.3966	-15.9867
	71.6589	-11.2398	5.9953	74.2937
	-110.948	-553.975	-425.806	-397.201
	62.0105	342.596	202.703	248.373
	-320.346	27.4273	-26.5136	160.679
	-9.12801	-118.711	-121.471	-66.0496
	14.4345	-29.8202	-134.203	-11.4745
	18.8244	94.0417	45.2241	75.2793
	99.0492	-10.8621	-388.755	-407.679
	53.2299	67.2139	166.733	36.0947
	-16.918	-51.3272	55.4258	-74.7592
	4.16499	82.535	30.0877	-34.2456
	-43.5139	39.3667	85.6156	-6.61605
	-33.7562	97.402	135.716	95.0734
	1.30849	127.241	207.494	202.791
	-44.514	41.2618	161.148	62.4767
	78.6124	-111.826	57.5259	-24.3376
	-60.8398	-24.7327	-204.415	-304.647
	48.4486	51.6948	93.4832	71.3718
	48.593	9.16333	95.9412	102.302
	9.99023	-174.456	58.2007	37.5881
	-89.5645	-556.376	-785.642	-512.344
	65.6369	372.261	272.784	227.008
	43.5845	132.932	91.6373	154.729
	91.8644	72.2709	101.138	132.147
	57.7236	-334.089	-288.838	-153.005
	133.948	192.182	224.948	106.113
	127.727	-251.717	-249.483	-70.5269
	-254.731	-293.755	-471.798	-710.03
	-22.3277	211.023	121.603	216.897
	11.7751	33.5613	34.9754	16.7651
	-47.5183	78.1909	66.3597	38.1287
	-20.8078	102.76	144.811	140.612
	118.717	54.9363	137.952	134.008
	134.586	72.1405	241.936	75.7571
	9.7637	45.0022	180.788	149.38
	64.3484	187.401	204.953	257.154
	-100.339	126.986	229.353	182.594
	18.2531	-63.8506	34.9881	-132.8
	163.394	62.3848	28.5556	63.718
	102.702	61.8961	-29.9184	29.6591
	-10.8891	-76.1566	-40.924	-32.6667
	10.1357	-88.4256	-35.7452	-148.175
	94.509	-28.0251	-161.888	-142.479
	9.03414	59.1142	213.033	140.652
	137.263	206.354	96.3417	252.276
	159.026	170.355	122.151	248.135
	163.47	183.543	154.505	154.673
	-284.626	-1003.06	-308.188	-457.522
	-218.682	127.925	-123.035	121.538
	-48.7362	127.407	67.0104	-35.3065
	-35.0251	122.926	-6.39745	84.3313
	-84.1213	5.28248	-296.303	-236.226
	-155.085	-144.573	-220.505	-429.872
	-114.952	229.819	130.123	211.081
	-41.5885	106.169	124.901	198.536
	59.3519	-52.5439	21.2708	3.14151
	12.1328	70.7306	106.322	85.2902
	77.2538	-396.454	-241.946	-499.508
	-14.2672	259.498	276.165	321.347
	-18.6024	-145.085	-236.52	-120.124
	-60.1553	-10.2709	182.989	94.601
	-70.212	20.3419	12.4263	99.8789
	-27.5274	31.1679	23.7259	91.0015
	-2.79038	-84.0067	29.8847	-65.1234
	-54.4086	20.0157	59.9592	-37.0848
	78.0835	-429.759	-725.41	-364.432
	86.7496	-258.527	-179.764	58.2767
	73.8572	100.396	100.964	26.0568
	-64.5133	-67.9957	-39.1618	-185.643
	16.3238	85.217	3.09719	-6.67265
	-222.251	-115.702	-50.9027	-59.865
	14.1874	116.953	30.8242	100.186
	64.1749	81.9574	82.4438	64.4603
	20.3547	-88.5569	69.3662	-59.2463
	83.3759	-3.29033	63.6323	-42.7661
	36.671	-132.397	-26.3629	-186.054
	-87.0797	-48.0272	-51.9318	-65.4623
	-162.948	-235.605	-418.236	-505.206
	11.6645	263.592	330.898	360.546
	132.291	100.32	100.621	81.271
	39.0946	-50.052	-42.7419	-124.464
	-11.73	47.9298	186.968	32.6433
	12.9427	59.7944	-190.829	-270.557
	-53.0132	193.598	110.609	501.905
	96.9637	248.133	139.789	275.363
	-215.989	-141.448	-220.4	-108.282
	-44.5561	111.046	41.759	128.313
	25.0545	-77.7906	45.4997	76.854
	8.56795	160.768	51.3845	88.0556
	69.9326	73.9419	34.2482	48.163
	-23.6894	-120.216	-85.7843	16.3745
	235.129	218.889	-58.3532	151.831
	-288.029	-388.895	-344.368	-388.136
	61.4377	-23.7855	-77.9669	-32.4651
	-83.627	44.5745	-34.1554	49.0216
	102.72	42.6988	113.639	10.4653
	63.9132	123.028	-9.15968	-136.669
	-25.0798	-29.6307	51.4121	15.9068
	-34.2097	-114.595	35.8792	-68.3865
	0.37496	32.2551	48.055	39.4482
	-47.6783	44.5889	135.614	11.2138
	49.7123	-310.962	-596.394	-355.812
	-13.9273	151.069	335.018	224.874
	7.52905	25.2639	15.0131	123.083
	-27.6673	-7.80305	50.5882	109.111
	13.5319	-24.6416	26.6197	-187.729
	4.72949	54.5807	-82.2436	37.5516

## Sheet: P2
Blind RHF	Fig 2A: Right LGN	Fig 2B: Right V5	Fig 2B: Left V5	Fig 2A: Right V1
525 data points	52.7311	47.9905	31.2573	17.6826
1050	9.97047	-1.00967	-5.76514	-12.1734
17.5	-29.3406	-39.3427	-18.6993	-1.10153
525 vols	42.0005	36.4064	30.9816	-13.5841
	-73.2555	-78.7146	-50.6975	-52.5281
	-28.4102	2.34378	-4.1203	54.7004
	36.2002	66.6556	75.0806	27.9687
	-64.9011	-26.0264	-28.4048	12.0396
	34.0028	-40.5507	-0.892539	-7.59125
	12.8759	-25.9561	-0.845887	-46.7086
	65.2433	-40.8878	-58.3899	-12.1854
	11.8853	-28.2545	20.6404	24.3896
	-33.301	-37.8064	-4.43129	-17.5869
	-7.42288	52.0119	68.8973	10.101
	28.0307	18.9514	-13.1416	3.20931
	-10.3732	-37.894	-18.0523	-39.8558
	-73.6705	5.88518	8.91033	-36.2109
	-56.2333	-4.17517	-20.8118	16.0326
	33.7652	37.8586	60.3756	73.5355
	-14.6505	-9.30367	-51.9762	-47.3116
	-99.22	-158.95	-107.835	-82.5593
	-18.8454	35.6668	48.4271	37.6744
	91.997	45.4842	-23.1355	-12.0794
	-32.0336	41.7733	-4.94533	28.7547
	24.0034	11.1952	39.7379	-21.7028
	-35.3952	76.4957	-2.78021	1.44737
	59.5084	46.8089	61.2961	90.2732
	-0.826142	34.5923	24.675	40.2966
	37.4115	44.8466	65.0292	34.0921
	83.8343	78.3374	32.5066	16.8215
	83.7322	23.7304	28.388	89.8156
	10.1326	-27.6626	11.6339	10.1821
	13.0701	-43.7449	-49.4824	-34.1067
	10.3164	-0.381986	0.973154	-28.5251
	40.8201	-86.5276	-78.3424	-37.9634
	-46.442	-56.0648	-8.71161	-13.9635
	57.6894	56.8083	15.9834	-25.3946
	-46.1988	31.5359	44.3272	-29.712
	21.1501	-8.10869	16.1947	22.063
	-152.541	-64.0799	-112.143	-35.4658
	33.0714	8.66891	-20.1627	9.99044
	14.3162	-20.7493	30.0909	7.78527
	69.1167	16.1678	-46.818	-22.3653
	6.62672	-18.4096	-3.8406	-33.4321
	24.4208	-59.7037	-60.6352	-54.2689
	-69.7194	82.3742	62.5172	43.4268
	-17.6337	-15.1951	11.7993	20.5616
	-61.32	-30.6429	-46.531	6.66605
	18.2806	-58.2149	-37.1956	-15.2582
	43.666	72.9402	-1.51287	43.9026
	3.99754	41.2483	51.1461	28.5259
	28.8088	24.423	53.9184	47.2099
	74.9332	62.0949	36.9866	31.7397
	13.9871	-23.5888	-6.36434	-4.67177
	-28.0024	-25.9598	9.78124	40.208
	-12.1859	-88.1473	-19.543	-37.0752
	28.2375	40.4715	37.7871	22.1136
	66.3858	31.8091	50.4724	38.512
	9.70568	-27.3574	22.5866	4.72519
	-96.6365	38.6333	32.8273	-4.19421
	-20.9103	-12.8788	-27.711	-44.6192
	-40.8843	-75.7905	-66.0714	-53.4507
	59.1711	-37.963	-15.7818	-52.3231
	27.3421	69.0999	20.509	49.6818
	33.8656	-5.02318	20.5166	27.8089
	-19.4414	-5.81464	-10.0767	11.9383
	2.04476	36.338	8.75808	-31.1263
	-56.2282	-60.7636	-73.6241	-29.5909
	28.0376	66.4296	40.1218	78.2
	-52.9574	12.494	-3.58918	21.1358
	104.672	90.169	38.6136	70.8582
	23.5326	-47.4876	-9.95479	-30.5897
	-0.445883	4.12612	28.3228	-18.0223
	-40.3861	26.9316	-43.4409	-27.1565
	-29.4184	0.396457	-18.9019	-30.1925
	54.9772	4.54095	41.0553	-18.2312
	-5.67642	-36.6238	-30.2027	-18.2314
	-75.7427	51.7263	-37.1151	-52.9199
	-48.2181	-3.84057	53.4833	27.5681
	-38.2221	-12.4388	-16.4301	33.5343
	-13.2128	25.8405	77.0856	64.8176
	42.4274	15.1178	-62.7957	6.42922
	-33.2843	-32.1589	-15.7084	-17.7148
	46.1696	8.08785	-41.5764	-10.7711
	-17.0293	17.2662	73.1328	20.5
	-53.527	14.6475	5.67818	-40.5461
	44.2979	-27.0413	6.19939	11.8477
	-60.5343	-68.9995	-24.7016	-28.2865
	-80.5055	21.709	-18.0936	-23.4618
	1.91613	-22.5733	26.7542	14.7538
	-6.62124	7.79107	23.874	4.89545
	56.7276	-41.6705	-8.43847	-40.3791
	26.404	-21.8644	27.5653	28.5092
	78.0068	33.8129	16.7375	59.1519
	24.4222	-41.9297	-17.6926	-5.04558
	-46.4898	-62.1676	-52.4296	-59.9503
	113.424	12.9924	-11.0005	-20.2928
	23.3565	-19.6805	-23.6244	-42.8959
	-18.0948	-38.2712	-17.8364	-4.57336
	50.3787	-14.1216	1.39501	-18.7981
	-3.84044	-19.1281	-55.8181	-43.4622
	-50.8345	-23.506	-91.0788	31.6069
	-0.144648	3.22578	-4.35792	3.89355
	-71.8974	87.538	32.7702	19.2231
	79.9376	30.8971	44.097	-3.50976
	-16.0182	50.5377	21.9576	27.3328
	32.3609	-6.60326	-3.12844	-31.2359
	-58.2584	17.8522	-0.427103	-31.2493
	-0.842261	2.18224	4.59394	3.41528
	28.1303	59.1782	149.711	102.068
	-52.9985	-169.551	-172.261	-111.576
	-33.6257	38.8184	104.279	82.2417
	72.6939	65.6378	0.526666	96.3181
	-72.5623	68.1337	93.322	41.708
	58.1568	-39.858	-24.6655	-30.0949
	7.39033	-57.1469	-78.1315	-17.4571
	54.6951	-41.0763	-7.54646	-33.195
	66.0478	62.0374	50.3704	37.7591
	-31.5567	6.97418	-7.75175	7.19475
	-26.9181	-23.7172	-47.7143	4.64906
	-28.4801	7.36737	21.709	0.252033
	-42.8335	43.3181	4.58384	13.8786
	-58.9392	-69.3103	-45.2105	-58.3341
	-67.255	8.00869	-1.33913	-6.80412
	-32.5517	-12.096	-9.34474	2.81347
	-5.04044	-2.5726	19.9496	1.84093
	-28.4519	47.5855	41.8565	1.46045
	19.1678	14.2776	-10.2722	-26.9349
	-43.7802	64.8602	-7.41085	65.7469
	-58.9903	-30.4391	-12.5584	8.77137
	-39.7493	34.7687	1.15701	17.2854
	-13.5817	-19.2359	-3.85964	-19.9253
	-35.4955	-21.458	-1.49503	16.2847
	199.556	93.4126	88.842	21.3651
	-7.98938	-6.1177	20.14	-0.785177
	-19.7298	-79.0925	-82.0912	-40.6638
	43.7649	-29.2896	-18.0883	-26.666
	25.4652	35.4796	3.31677	6.88141
	-6.32968	-29.2558	-32.5732	-21.5404
	4.54829	-35.1941	-30.9334	-28.5742
	82.5577	-0.468809	-36.0047	-9.56042
	70.2463	34.8868	4.20245	4.27263
	-28.5163	44.4766	26.3064	117.201
	-154.122	34.6672	-6.59571	-4.53736
	-134.927	-72.2972	-23.0737	3.41776
	25.78	32.5178	2.38595	-18.3283
	49.1389	9.03336	-5.09367	6.25452
	-114.199	-21.6145	-23.1642	9.4255
	144.257	69.6918	46.2009	-1.96781
	4.24127	12.0405	6.37976	-55.4963
	-13.038	-0.534898	-4.61031	-3.01382
	-120.478	-20.2414	0.70294	3.00885
	2.84429	43.4298	-81.7676	37.0582
	8.66013	1.63771	-1.86902	8.4867
	197.235	19.1007	77.4782	29.0416
	22.4178	6.02478	61.4804	44.1521
	-83.1362	-18.148	21.4278	-25.9268
	-129.226	-33.8777	-13.6576	-19.0052
	-9.85866	-41.9763	13.0343	-69.8342
	35.193	-6.20834	-23.8721	-18.5957
	52.0561	-12.1633	-15.4345	1.78997
	39.7305	-13.1872	28.0491	-4.54109
	37.3703	3.50551	-18.32	-34.6363
	29.734	-18.1516	-19.5189	35.5538
	61.7835	-40.741	3.47824	-18.885
	7.65719	-39.1303	-56.5967	-21.7009
	8.38316	-32.4539	-3.02349	-3.10685
	21.9731	-33.2985	-9.43023	-8.73794
	7.71841	12.8905	21.6302	21.8396
	35.754	-9.76133	-33.77	-22.7968
	-26.1753	32.094	11.9674	5.00621
	45.5154	15.0797	38.3218	-35.0544
	3.5787	3.86216	9.90662	-0.355598
	-11.184	74.0419	133.995	136.68
	-57.5863	-80.5462	-160.38	-65.0468
	-53.0814	-23.6967	47.924	-53.7897
	47.8334	81.2822	26.9548	-20.8633
	-23.0504	73.2317	50.826	-7.53978
	-65.3126	2.76649	20.6649	-5.47246
	12.1317	30.4933	25.1606	44.5107
	-66.0375	-66.7789	-130.186	-104.688
	24.8105	14.7874	15.2228	53.8499
	8.18622	-41.4597	-28.3559	-22.3946
	-27.1118	19.3835	87.6616	28.7253
	78.208	33.5427	-15.868	-15.7931
	28.4497	17.0835	57.7594	2.5942
	-34.2167	-8.94182	22.5101	-47.5674
	4.98313	-20.6297	47.7114	56.4278
	-91.2963	-75.5332	-117.989	-115.999
	10.7354	-74.5148	-19.6588	8.44345
	-28.9689	-7.85651	19.8571	24.9336
	25.6191	-26.2241	-70.1135	-43.9811
	25.9163	60.4238	101.837	44.4328
	53.728	7.20111	12.2169	69.6034
	-79.2496	-93.4501	-49.0814	-65.8159
	-4.0044	-7.25058	-2.063	4.32738
	-1.6494	-0.647181	7.99148	13.6929
	-36.2804	-0.998187	16.0489	55.4448
	84.2955	45.0585	0.499813	66.3573
	23.5259	-1.30471	1.74951	27.3739
	42.4665	36.8686	3.7025	25.0202
	-96.2302	-27.0727	-104.768	-43.6585
	17.3848	1.97297	-42.443	16.1738
	-0.293327	7.44718	-3.0873	0.876321
	21.3149	90.0398	44.5154	17.4557
	38.0456	26.7897	27.8272	-7.87573
	26.2505	-55.3664	-25.2952	-67.431
	-35.8393	78.2288	46.9543	57.2371
	-71.3752	91.8728	61.8907	48.4003
	54.996	-6.15614	23.4156	-4.79127
	-37.4473	-5.87812	-18.9868	-39.2468
	-65.4423	-45.2705	-48.7758	-77.4695
	47.476	60.8495	49.303	66.5088
	-3.36148	-1.68816	-3.65223	-6.71095
	-74.1888	-70.7334	-49.1021	-87.7249
	17.8378	-97.3728	-25.0664	38.4827
	-9.34348	-7.10991	0.86741	5.83045
	-205.574	-41.376	-58.0069	-22.8649
	42.1181	115.977	44.818	88.0877
	89.7969	51.218	73.8306	66.5494
	35.2508	113.839	55.3026	62.0762
	35.8397	11.1328	30.9813	-17.438
	39.3623	-73.7165	-21.7837	-19.2385
	87.235	-26.5227	-5.25036	-45.1548
	-17.7543	-50.7343	-69.3241	-48.236
	-14.8747	-56.4575	-57.4465	-48.653
	4.46198	-22.5433	-0.344355	-3.64543
	-91.1078	-76.0465	-74.0843	-70.1449
	-18.8295	3.71163	-8.69067	17.9427
	-15.5137	-8.09966	6.80452	4.74711
	17.2862	97.2085	68.0941	48.5117
	-71.7422	70.8473	71.5321	48.5493
	-7.87107	-5.20515	6.42839	24.3372
	16.7347	89.2555	96.8499	57.7906
	13.4217	-5.09481	-52.448	-54.4641
	-22.1442	31.6875	18.8869	61.0752
	54.815	-12.3173	18.6447	-57.8827
	-6.89623	-4.36671	-5.74698	-14.8976
	-69.4228	-39.5056	-29.6349	-25.0182
	20.283	-41.1404	-61.5143	-71.7916
	-19.3955	-39.8236	-35.4254	-42.2592
	-8.58555	-4.04454	-6.58417	6.81526
	3.73326	53.7935	62.3616	88.6861
	51.9305	28.9461	71.8071	59.8564
	-5.73278	-6.52306	-1.04411	8.81775
	-7.27537	-115.339	-60.2625	-20.9623
	54.785	46.5824	48.5008	0.959842
	-181.502	-8.69485	-63.2584	-35.9389
	15.8589	3.42125	-12.6328	-10.4809
	49.6442	-96.2308	-93.2098	-84.6944
	-6.85819	-14.2213	-13.5956	-9.00235
	-171.51	-166.666	-168.401	-123.803
	41.1383	116.288	136.217	160.094
	77.833	90.2022	28.6121	97.3133
	104.669	31.2029	34.2849	43.2479
	86.8689	-11.219	12.5286	-15.1076
	36.666	45.5757	55.1692	28.2049
	-82.6207	0.997471	-21.7816	-38.6413
	59.7292	-53.0483	-34.2625	-12.936
	23.6698	-9.48647	2.8895	-0.785507
	-32.1111	20.6837	17.1934	-12.4612
	-6.65463	30.178	50.7561	48.7431
	14.28	2.34803	3.94082	5.86432
	11.0403	-0.770767	0.508805	-0.154844
	6.01277	-62.8202	-59.9948	-90.1922
	-16.9409	-38.9052	-36.0858	26.4447
	49.8712	-18.819	-12.4366	6.67766
	11.3385	13.3661	5.91543	6.93694
	6.02315	86.373	28.378	22.1208
	56.8784	36.6488	33.543	-31.2015
	1.17847	61.7394	45.5883	68.5541
	24.0915	14.7712	-4.28802	-12.9886
	-12.9336	-61.2057	-35.4367	-10.0399
	1.84322	0.892794	2.4904	9.98249
	10.3648	8.46182	11.5902	17.9216
	124.052	25.5977	36.9456	100.043
	4.05535	12.3355	7.69148	19.0622
	21.4325	63.1432	39.4464	44.9871
	29.4714	18.7395	82.1594	24.3328
	-97.7765	14.5227	-59.5443	-20.0978
	-14.9336	2.358	6.59985	-7.70889
	12.3909	-68.3124	-23.6374	-31.5901
	-14.1188	2.98751	8.4009	-23.0399
	-191.103	-71.3744	-39.6313	-78
	-6.60634	-34.777	-23.7491	-11.9041
	-0.100479	7.88408	32.4333	17.4385
	41.2596	13.4731	-5.48706	13.0345
	-1.46425	19.9099	24.7732	40.6743
	3.87215	-14.4021	21.2484	15.3353
	-41.5007	30.4691	-8.82526	-2.8293
	-72.8482	-21.1457	-13.9533	-2.44055
	-26.6322	-60.4318	-25.0945	-21.3031
	-22.2667	47.4522	55.0697	28.0821
	-143.852	25.2218	30.3619	66.0069
	-93.6822	-93.8961	-8.77089	-4.9871
	-4.26717	-12.3976	-4.56348	-11.4256
	48.9098	-68.7014	-86.2015	-101
	-14.4322	2.48659	-42.8763	-28.5507
	112.624	-65.4782	-72.3667	-64.7569
	-29.2495	6.96874	-44.2388	-36.8187
	19.4367	82.3772	12.5029	1.9194
	36.1826	55.1771	28.4503	-15.4064
	40.7336	34.9665	55.4622	5.6324
	30.0592	35.9967	-23.9856	-47.5711
	-50.6801	3.56485	9.89722	-34.3959
	-8.99042	59.6022	80.2523	81.32
	48.3246	-35.7397	-4.70646	11.7324
	80.2627	-43.4951	21.428	10.4302
	110.723	80.9581	70.9984	64.6329
	-33.516	19.5302	13.9155	29.2634
	63.7857	-67.4135	-38.2875	-25.2157
	-16.7988	49.144	25.8558	34.2196
	0.67897	-23.1179	-43.3406	-51.146
	1.42535	-30.3907	-16.468	-24.7907
	11.9646	16.7469	24.595	2.74923
	-78.0835	-46.1389	-48.2788	-55.5909
	4.86758	-32.9797	-44.8769	-36.8703
	-50.4154	6.24607	-15.5338	15.7294
	-95.8411	-3.62858	-61.8013	-33.7008
	45.9292	-15.1836	6.21145	-2.41331
	58.5584	120.665	59.2109	52.1564
	32.1045	7.48875	5.82505	4.0575
	-24.7335	-51.9249	-26.6089	-1.93757
	-23.6008	16.5048	-60.9037	-11.1744
	-7.95859	5.39985	9.57953	-17.9416
	29.578	92.1358	85.6263	22.7569
	-58.7315	-21.5884	-66.7614	-18.0088
	-59.4485	-55.6196	-68.7113	-9.71568
	-5.50386	22.0858	8.30161	24.7073
	-44.7952	23.348	3.94567	-27.0265
	19.4252	36.1228	18.1272	33.8224
	1.51731	-11.5916	-6.67514	-2.20744
	42.1792	-153.783	-185.898	-33.9911
	20.5823	-72.2719	60.1653	-20.0321
	10.8824	-12.3494	78.8749	-20.5844
	19.3134	28.4174	-4.60768	-15.2799
	25.9569	70.2286	42.6914	63.3984
	-19.9963	-19.8406	-7.48789	-31.3718
	-21.5495	2.8589	-18.4331	-34.3679
	55.8559	-36.4253	-32.9091	-1.64897
	-42.463	-65.4921	-26.5664	-16.5896
	-9.85388	24.687	113.378	45.3621
	-87.8457	18.4747	71.8145	23.1978
	-8.2969	-75.7367	-12.7753	-32.3681
	53.9787	32.4009	-16.0833	50.6437
	-53.9979	15.692	1.55735	29.5398
	42.0265	31.6006	22.3291	30.4088
	92.367	106.293	54.1334	60.6289
	-21.4201	18.6554	-9.54249	-10.2499
	-51.5001	9.28209	-38.1562	-18.4482
	30.3762	-14.2192	30.6716	-4.66843
	-73.844	-37.6169	-109.899	-42.2433
	34.2508	56.4087	105.821	137.835
	-41.8013	-102.854	-75.7524	11.4095
	79.2054	70.0033	71.0768	42.5949
	41.5051	30.308	36.9881	2.74403
	89.5848	33.626	5.58702	22.4966
	29.2638	-27.047	-5.03096	-29.0766
	-10.7925	22.0913	21.5278	-17.4632
	-69.3476	25.1717	2.70148	-45.0662
	-18.7258	-37.4961	-28.0826	-8.97444
	33.9093	-3.99184	-0.0961713	-15.2319
	-38.7635	-16.8919	-20.412	9.17711
	47.992	-42.9443	-21.158	-16.8324
	0.949016	-15.681	-34.7908	-41.299
	4.3407	19.5713	13.9081	-18.6629
	31.9987	-4.60133	3.58486	8.32986
	41.7853	43.0733	0.423766	3.2022
	-58.4258	-3.79343	-47.6986	-16.6382
	-77.2293	60.9843	27.1945	45.9974
	-98.291	-61.7861	-21.299	-24.806
	18.2247	-7.58695	-22.8327	-23.6973
	-117.528	-60.0253	-103.64	-85.9657
	-40.5985	-20.5223	31.1082	25.2287
	90.2073	145.172	144.701	153.234
	-57.568	23.7468	6.32428	-2.69512
	-20.2219	-59.6058	0.938482	-1.34054
	84.4831	96.217	118.132	58.19
	44.0693	-8.80165	-2.48812	-14.3709
	29.2352	9.54304	2.71423	39.2706
	-107.724	-108.096	-43.7893	-54.9484
	44.8699	-10.9282	-9.29696	2.7553
	-31.6964	-26.4079	-12.1294	-38.7763
	75.599	-25.9469	-14.8844	13.2627
	-10.7564	-0.110234	4.88617	10.9172
	-82.3671	13.1928	-24.7904	-37.2379
	14.2329	34.0281	22.3355	6.5862
	46.3295	-6.96648	-2.98629	15.0795
	-2.5479	-28.9368	-19.4083	-48.3548
	32.8625	-92.6738	-43.2067	-19.5584
	31.2536	20.3254	40.232	-10.2304
	-4.26742	-13.8091	-58.5593	-36.1001
	26.194	36.5615	15.0225	-2.09862
	-23.3127	-1.8873	-8.67658	0.798096
	46.6324	85.2144	73.957	4.73897
	-47.691	-6.62273	25.8655	-25.8975
	18.1248	28.7981	-26.5149	37.309
	-53.2275	22.8917	41.8126	36.2984
	71.8171	38.915	18.3614	-20.49
	-19.2244	-0.269825	-8.81396	3.4473
	-38.3618	-52.3995	-20.1401	-75.102
	36.2989	-49.6472	-90.962	-21.7668
	103.595	-23.198	42.274	46.3774
	-4.80682	90.7666	69.9511	-0.850196
	-164.677	-154.132	-159.034	-151.773
	65.5633	-40.982	23.7506	102.167
	-93.1751	-216.555	-153.579	-130.064
	69.7725	190.168	154.979	131.992
	54.9609	140.986	85.9125	103.857
	-3.2465	4.14061	29.7913	22.5732
	13.9366	-8.26053	-18.5223	-46.1831
	-160.293	-51.0534	-76.8413	-55.479
	57.6137	6.88725	-26.2536	7.13198
	27.2225	-6.42027	-23.4551	-22.481
	-4.71695	20.5962	-65.6153	-57.2381
	-35.0617	10.7347	11.5196	27.1374
	-78.0888	7.38258	32.7169	94.8104
	45.3619	37.9279	-6.69061	49.2361
	-2.07394	-69.3574	-102.238	16.3217
	-47.1761	89.8462	92.3221	76.0804
	81.7584	102.721	59.861	65.0927
	14.891	63.4352	119.052	71.1895
	5.74632	28.9633	28.2618	18.3644
	21.0776	-27.3705	-10.3264	-39.2892
	-28.0207	-68.3089	15.5474	-13.074
	78.2003	14.8675	15.5571	-22.2956
	-17.4663	2.71378	-5.18664	-4.62754
	54.0983	-24.8521	1.14311	20.063
	78.1065	24.2525	-7.86355	-34.1569
	-69.8908	-39.399	4.09962	-11.3181
	41.0361	-92.0116	-86.9182	-114.057
	-18.933	-79.093	-90.7226	-33.617
	-79.9401	-26.3051	-3.84288	-55.1939
	46.6941	-9.46025	32.6712	11.6802
	19.2508	12.4427	20.8457	30.2809
	26.4808	-49.7841	-48.0607	-92.3139
	-31.2147	-55.0908	-33.3172	-14.2442
	-27.2387	17.6898	-22.0835	-10.3997
	68.8321	29.9019	-2.79317	7.86482
	-15.1793	51.387	32.7773	57.4039
	-20.418	40.4847	50.814	37.2466
	-23.9425	-19.745	2.74744	-0.528301
	-8.56894	5.98989	30.4682	26.9461
	-80.9401	21.6724	-0.241953	13.1983
	-134.994	-240.462	-249.98	-150.656
	36.662	28.4074	66.6892	-14.9903
	5.38687	6.24879	-94.2541	-41.3041
	13.9863	158.72	45.1747	80.1368
	-9.94659	117.059	122.076	86.459
	135.512	125.421	112.094	53.2531
	-1.43071	25.2223	15.5661	-43.7542
	-51.0972	-57.2063	-12.8071	-3.07233
	-45.5635	-10.6578	13.2831	-44.0522
	-35.1293	-14.3191	12.5261	-10.8548
	32.9878	-2.25888	12.0347	58.2136
	25.0232	8.59741	9.18502	9.81595
	-13.7469	-46.659	-33.6224	-11.1066
	-112.464	-59.6963	-68.6222	-62.0944
	-47.8944	-42.3853	-6.50993	-15.5784
	25.0004	-45.4503	-1.32112	28.9211
	-31.1849	-7.16373	-29.3668	10.2619
	-5.25851	-12.7271	-15.249	23.637
	29.9124	89.307	85.6217	72.0679
	-20.0677	10.8091	-41.9635	12.7087
	27.8732	22.9116	27.6171	-15.0626
	76.4942	27.2003	21.7437	2.07673
	-32.3757	12.3121	61.3773	23.2388
	26.1083	47.3072	-3.30386	1.78182
	-62.4756	-57.3177	-29.1785	-58.955
	45.5306	-19.8659	2.01372	2.41277
	74.5251	-30.0645	-26.1484	-24.8717
	44.1332	4.53012	17.0429	18.6883
	-59.1767	-4.45645	8.77098	8.40514
	14.0134	10.5986	10.8616	30.1017
	-35.722	-32.6516	-14.1732	-33.8443
	0.290544	3.45096	8.06103	8.71535
	-14.57	-7.67376	42.2151	58.1373
	-33.6616	-17.4036	17.8499	39.2347
	29.6264	49.6664	20.6063	10.8435
	-25.7958	60.9234	-28.9529	-17.1859
	-41.8772	-10.4398	-17.973	-8.94353
	32.0819	5.2485	23.9854	20.7043
	82.065	36.4808	-13.2727	-33.9406
	4.027	70.2153	67.122	33.301
	-9.43657	-6.55397	28.9184	-1.12023
	2.35374	27.4898	21.3492	-13.4231
	5.19136	-14.4671	-41.5661	-43.9842
	26.0387	15.7052	-19.9187	-43.5912
	-49.773	-21.7419	-6.10666	30.5897
	-37.6379	-76.4765	-24.8908	19.4795
	-51.7486	-107.501	-62.7722	-64.0986
	-4.71202	-67.2315	-1.77255	28.0405
	59.7384	92.6159	23.4401	32.0779
	23.8775	64.4861	45.3585	4.15932
	33.1262	22.1013	4.60525	47.2332
	8.51406	86.6181	104.877	26.0668
	21.4225	55.6731	48.1724	22.5179
	-43.3279	6.00503	-25.1725	-16.3105
	62.6405	-80.5076	-20.6022	-36.4536
	10.3158	13.431	-5.9632	20.455
	49.49	-1.17205	-13.6267	-42.4335
	13.2833	-48.0573	-13.3329	-35.0807
	-54.5987	-52.0481	-42.618	-44.2002
	-30.8913	-34.9731	-46.5903	4.83616
	18.5886	-52.5404	-30.9077	-60.2981
	-20.7329	-68.6827	-86.7843	-65.8387
	-11.3292	8.39788	15.0954	47.266
	20.0495	-49.2504	-15.8962	-25.3367
	-22.9145	76.2812	1.42245	49.4025
	55.8918	23.2551	-83.8556	-28.4721
	9.33123	-0.321117	-6.00909	-1.31038
	5.39761	5.10129	-1.80594	-1.70053
	-36.6707	74.3176	23.8693	14.319
	82.2479	-32.4989	1.59388	13.8681
	43.5646	74.5486	100.682	42.0657
	-22.7551	3.96586	23.2476	-19.0782
	-5.84674	-13.4282	-13.2898	-19.3686
	16.1407	-73.572	-20.606	-20.2039
	56.7719	-3.39799	0.192646	-17.6805
	-69.3117	-42.328	-24.2112	-43.2
	9.32278	-71.1474	-56.3908	-54.8702
	17.8438	-31.6461	-62.6955	-38.9155
	26.1594	49.7897	50.1445	11.7519
	15.4997	40.9778	50.4682	81.1083
	-38.3248	3.65679	-16.1038	-2.95116

[truncated: 12 more sheets: P3, P4, P5, P6, P7, P8, P9, P10, P11, P12, P13, P14]
